# Supplementary material for: Measurement Report: Elevated excess-NH 3 can promote the redox reaction to produce HONO: Insights from the COVID-19 pandemic
Source: Copernicus journal article supplement (doi:10.5194/egusphere-2023-2913), 2024-02-12
Supplement: Supplementary file 1 [file egusphere-2023-2913-supplement.pdf]

---

1 *Supplement of*

2 **Measurement Report: Elevated excess-NH<sub>3</sub> can promote the redox**  
3 **reaction to produce HONO: Insights from the COVID-19 pandemic**

4

5 **Xinyuan Zhang et al.**

6

7 *Correspondence to:* Shenbo Wang (shbwang@zzu.edu.cn) and Ruiqin Zhang  
8 (rqzhang@zzu.edu.cn).

9

---

10      **Text S1 Detailed description of the aerosol and gas monitor.**

11            The atmospheric sample passes through a PM<sub>2.5</sub> cut-off head, and both particles  
12 and gases enter a wet rotating dissolution device for diffusion. Subsequently, the  
13 particles in the sample undergo hygroscopic growth and condensation in an aerosol  
14 supersaturated vapor generator, followed by collection and ion chromatographic  
15 analysis. The gases in the sample are oxidized by H<sub>2</sub>O<sub>2</sub> in the dissolution device,  
16 absorbed into a liquid solvent, and then entered the gas sample collection chamber for  
17 ion chromatographic quantification. During this process, the sample is extracted  
18 through a liquid diffusion filter, where interfering acidic and alkaline gases are  
19 removed. To achieve high collection efficiency, the airflow containing loaded ions  
20 then enters an aerosol supersaturated collector until the particles can be injected into  
21 the ion chromatograph. The ion chromatography system utilizes either suppressor or  
22 non-suppressor conductivity detection methods for ion analysis. Before running the  
23 samples, the ion chromatograph system needs to be calibrated using standard  
24 solutions. By comparing the data obtained from the sample with the data obtained  
25 from known standard solutions, the identification and quantification of sample ions  
26 can be performed. The data acquisition system generates chromatograms, and the  
27 chromatography software further converts each peak in the chromatogram into sample  
28 concentrations and outputs the results.

29  
30            **QA/QC**

31            The instrument undergoes daily checks and maintenance, which typically involve  
32 ensuring the stability of internal standard response and maintaining a relative error  
33 within ±10% between the measured and theoretical concentrations of the internal  
34 standard. The system's data acquisition and transmission are carefully examined,  
35 along with monitoring the instrument's status information and collected data. This  
36 includes checking parameters such as sampling flow rate, chromatographic column

---

37 pressure, column temperature, conductivity, target compound peak retention time, and  
38 peak width to ensure their normal functioning. Regular replacement of consumables  
39 used by the instrument is carried out at predetermined intervals and frequencies.  
40 Additionally, standard curve measurements and calibration are performed in each  
41 season to guarantee the accuracy of the instrument's data. Calibration curve  
42 verification should be performed at least once per quarter. A standard series  
43 containing at least 6 calibration points, including zero concentration, should be  
44 prepared using standard solutions. The concentration range of the calibration curve  
45 should be set according to the actual environmental concentration levels and  
46 determined by manual injection. The obtained calibration curve should have a linear  
47 correlation coefficient (r) of  $\geq 0.995$ . If this requirement is not met, the rationality of  
48 the internal standard solution concentration settings should be checked. When key  
49 components such as the quantitative loop, chromatographic column, or suppressor are  
50 replaced, a new calibration curve should be promptly established. After establishing  
51 the new calibration curve, the sample sequence in the analysis software should be  
52 updated. The minimum detection limit is also determined as follows:  $0.002 \mu\text{g}/\text{m}^3$   
53 ( $\text{Cl}^-$ ),  $0.081 \mu\text{g}/\text{m}^3$  ( $\text{NH}_4^+$ ),  $0.02 \mu\text{g}/\text{m}^3$  ( $\text{NO}_3^-$ ),  $0.06 \mu\text{g}/\text{m}^3$  ( $\text{SO}_4^{2-}$ ),  $0.002 \mu\text{g}/\text{m}^3$  ( $\text{Na}^+$ ),  
54  $0.08 \mu\text{g}/\text{m}^3$  ( $\text{K}^+$ ),  $0.06 \mu\text{g}/\text{m}^3$  ( $\text{Ca}^{2+}$ ) and  $0.007 \mu\text{g}/\text{m}^3$  ( $\text{Mg}^{2+}$ ).

55 According to the research about the uncertainties in MARGA measurements,  
56 such as Song et al. used a 20% uncertainty for MARGA measurements(Song et al.,  
57 2018), while Rumsey et al. found an error of 10% for detecting  $\text{SO}_4^{2-}$ ,  $\text{NO}_3^-$ , and  
58  $\text{HNO}_3$ , and 15% for  $\text{NH}_3$  and  $\text{NH}_4^+$  (Rumsey et al., 2014), uncertainties of 20% are  
59 assumed for the detection of  $\text{NH}_3$  and  $\text{NH}_4^+$ , while uncertainties of 10% are assumed  
60 for other components. Due to the complex conditions encountered during the actual  
61 sampling process, including variations in calibration slopes, sampling volumes,  
62 solvent concentrations, temperature, atmospheric pressure, and sampling flow rates at  
63 different sampling points, it is important to note that the assumed values mentioned  
64 above may not accurately reflect the actual situation.

---

65 **Text S2 Detailed description of the NO<sub>2</sub>、 SO<sub>2</sub> and carbon analyzer.**

66 The NO<sub>2</sub> analyzer utilized the chemiluminescence technique to measure the  
67 concentration of NO<sub>2</sub> in the air. This involved converting NO<sub>2</sub> to NO using a  
68 molybdenum converter, and then quantifying the NO concentration. The principle  
69 behind the SO<sub>2</sub> analyzer involved measuring the amount of ultraviolet light emitted  
70 during the decay of high-energy state SO<sub>2</sub>. This emitted light was used to calculate the  
71 concentration of SO<sub>2</sub>.

72 The carbon analyzer principle is primarily based on the NIOSH-5040 method,  
73 which involves analyzing the thermal optical transmittance of quartz filter samples. It  
74 employs a calibrated non-dispersive infrared sensor to detect the evolving carbon.  
75 Under controlled conditions with inert helium gas, carbon formed during a gradually  
76 increasing temperature gradient is referred to as OC, while carbon evolved under a  
77 mixture of 90% helium.

78 **Text S3 The uncertainty analysis of HONO**

79 The HONO monitoring method adopted in this study is the wet-flow diffusion  
80 tube method (WEDD) (cylindrical or parallel plate(C. Zellweger, 1999; Takeuchi M,  
81 2013)) in the diffusion tube method (Denuder), which is a common method for  
82 measuring HONO in wet chemistry and has high absorption efficiency. The device  
83 adopts a vertical setting, through the diffusion tube, the air in the atmosphere is pulled  
84 upward from the bottom, and the absorbent liquid is transported to the top of the  
85 diffusion tube through the air pump. When flowing under the action of gravity, a thin  
86 absorbent liquid film will be generated on the inner surface of the tube by the tension.  
87 The absorbent liquid film will absorb HONO, and the solution at the bottom of the  
88 diffusion tube will be sucked out through the air pump. Then it is sent to the ion  
89 chromatography for analysis. The integration time of the sample mainly depends on

---

90 the running time of the ion chromatography, which is about 5-30 min(Takeuchi M,  
91 2013; C. Zellweger, 1999). Based on the original, some scholars developed the flow  
92 injection-chemiluminescence method and used it together with WEDD for the  
93 measurement of HONO. Its principle is mainly based on the fact that nitrite collected  
94 in solution is oxidized by hydrogen peroxide to peroxy-nitrite under acidic conditions,  
95 light radiation occurs during the reaction process, and its chemiluminescence intensity  
96 is detected. The detection limit is about  $0.03 \mu\text{g}/\text{m}^3$ , and the temporal resolution is  
97 reduced to 70s(Mikuska et al., 2008; Zhao, 2010). Wang et al.(Wang et al., 2023)  
98 showed that the system detection limits of HONO,  $\text{HNO}_3$ , and  $\text{NO}_3^-$  were 65 ppt, 65  
99 ppt, and  $45 \text{ ng}/\text{m}^3$ , respectively. Previous work has shown that HONO observations  
100 measured with this AIM-IC system agree well with HONO observations measured  
101 with the stripped coil-UV/Weiss absorption photometer (SC-AP) system(VandenBoer  
102 et al., 2014).

#### 103 **Text S4 Calculation and analysis of HONO sources**

104 Considering that there is NO photolysis at night, the  $P_{\text{OH}+\text{ON}}$  values at U-ZK and  
105 R-PY points were calculated based on the model simulation by Wang et al.(Wang et  
106 al., 2022), assuming that the concentration of OH in the gas phase reaction between  
107 NO and  $\cdot\text{OH}$  was  $0.8 \times 10^6 \text{ cm}^{-3}$ . The heterogeneity of  $\text{NO}_2$  on ground and aerosol  
108 surfaces should be shown to be a secondary source of HONO at night. The formula  
109 for calculating  $P_{\text{ground}}$  and  $P_{\text{aerosol}}$  is as follows equation 7-10. During the epidemic  
110 period,  $P_{\text{ground}}$  decreases due to the decrease of  $\text{NO}_2$  concentration, while  $P_{\text{aerosol}}$   
111 decreases slightly. That is, the decrease of  $P_{\text{ground}}$  dominated the decrease in the  
112 heterogeneous production of HONO.

$$P_{\text{ground}} = \frac{1}{8} \times C_{\text{NO}_2} \times \frac{1}{H} \times \gamma_{\text{NO}_2 \rightarrow \text{ground}}$$

113 (1)

$$P_{\text{aerosol}} = \frac{1}{4} \times C_{\text{NO}_2} \times \frac{S_a}{V} \times \gamma_{\text{NO}_2 \rightarrow \text{aerosol}} \quad (2)$$

$$C_{\text{NO}_2} = \sqrt{\frac{8RT}{\pi M}} \quad (3)$$

$$\frac{S_{\text{fg}}}{V} = \frac{2.2}{H} \quad (4)$$

Where  $C_{\text{NO}_2}$  is the average molecular velocity of  $\text{NO}_2$  molecule ( $\text{m s}^{-1}$ );  $R$  is the ideal gas constant;  $T$  is the temperature (K);  $M$  is the molecular weight of  $\text{NO}_2$  ( $\text{kg mol}^{-1}$ );  $\gamma_{\text{NO}_2 \rightarrow \text{ground}}$  and  $\gamma_{\text{NO}_2 \rightarrow \text{aerosol}}$  is the absorption coefficient of  $\text{NO}_2$  on the ground and aerosol surface, respectively.

Direct emission refers to the HONO that can be released directly into the atmosphere through combustion (such as vehicle and biomass combustion). Here we use the HONO/ $\text{NO}_x$  ratio to estimate HONO concentration, which is generally considered to be the vehicle emission factor (Kramer et al., 2020; Hao et al., 2020; Yu et al., 2022) for HONO. The calculation formula is as follows:

$$[\text{HONO}_{\text{emi}}] = 0.65\% \times [\text{NO}_x] \quad (5)$$

Where  $[\text{HONO}_{\text{emi}}]$  and  $[\text{NO}_x]$  represent the HONO concentration emitted by vehicles and the observed  $\text{NO}_x$  concentration, respectively. For the emission coefficient, we chose 0.65% to calculate (Kramer et al., 2020; Hao et al., 2020; Huang et al., 2017).

During the epidemic period, the direct emission of HONO at U-ZK and R-PY points decreased compared with that before the epidemic period, which was also related to the decrease of motor vehicle activities during the epidemic period.

The photosensitive polyphase reaction of  $\text{NO}_2$  on the surface of the ground ( $P_{\text{ground} + \text{hv}}$ ) and the surface of the aerosol ( $P_{\text{aerosol} + \text{hv}}$ ), according to the research of Zhang et al. (Zhang et al., 2020a), the formula calculated in this paper is as follows:

$$P_{\text{ground} + \text{hv}} = \frac{1}{8} \times C_{\text{NO}_2} \times \frac{1}{H} \times \gamma_{\text{NO}_2 \rightarrow \text{ground}} \times \frac{\text{light intensity}}{400} \quad (6)$$

$$P_{\text{aerosol+hv}} = \frac{1}{4} \times C_{\text{NO}_2} \times \frac{S_a}{V} \times \gamma_{\text{NO}_2 \rightarrow \text{aerosol}} \times \frac{\text{light intensity}}{400} \quad (7)$$

where light intensity was simulated by its relationship with  $J_{\text{NO}_2}$ . (HOFZUMAHAUS, 1992; Trebs et al., 2009)

The calculation of  $P_{\text{nitrate}}$  based on nitrate concentration ( $\text{NO}_3^-$ ) and nitrate photolysis rate ( $J_{\text{nitrate} \rightarrow \text{HONO}}$ ) measured at  $\text{PM}_{2.5}$ :

$$P_{\text{nitrate}} = J_{\text{nitrate} \rightarrow \text{HONO}} \times [\text{NO}_3^-] \quad (8)$$

In this formula,  $J_{\text{nitrate} \rightarrow \text{HONO}}$  needs to be simulated by normalized UV value. Bao et. al<sup>(Bao et al., 2018)</sup> found when the apex Angle is  $0^\circ$ ,  $J_{\text{nitrate} \rightarrow \text{HONO}}$  varies in the range of  $1.22 \times 10^{-5}$  to  $4.84 \times 10^{-4} \text{s}^{-1}$ , with an average of  $8.24 \times 10^{-5} \text{s}^{-1}$ .

The emission rate of HONO ( $E_{\text{HONO}}$ ,  $\text{ppbv h}^{-1}$ ) from soil was calculated based on the emission flux ( $F_{\text{HONO}}$ ,  $\text{gm}^{-2} \text{s}^{-1}$ ) and the PBL height (H, m) according to Liu et. al(Liu et al., 2020a; Liu et al., 2020b) and by using the following equation:

$$E_{\text{HONO}} = \frac{\alpha \cdot F_{\text{HONO}}}{H} \quad (9)$$

$$F_{\text{HONO}} = \frac{EI_{\text{HONO}}}{A} \quad (10)$$

where,  $\alpha$  is the conversion factor ( $\alpha = \frac{1 \times 10^9 \cdot 3600 \cdot R \cdot T}{M \cdot P} = \frac{2.99 \times 10^{13} \cdot T}{M \cdot P}$ ); M is the molecular weight ( $\text{g mol}^{-1}$ ); T is the temperature (K) and P is the atmospheric pressure (Pa);  $EI_{\text{HONO}}$  is the emission inventory of HONO ( $\text{g s}^{-1}$ ); A is the core area of the observation site ( $\text{m}^2$ ).

The convergence of HONO at night includes homopolar memorization of HONO and OH ( $L_{\text{HONO+OH}}$ ) and dry deposition ( $L_{\text{dep}}$ ), which can be calculated by the following formula:

$$L_{\text{HONO+OH}} = k_{\text{HONO+OH}} \times [\text{OH}] \times [\text{HONO}] \quad (11)$$

$$L_{\text{dep}} = \frac{v_d \times [\text{HONO}]}{H} \quad (12)$$

where  $k_{\text{HONO+OH}}$  is the second-order reaction rate constant of HONO and OH

---

162  $(5.0 \times 10^{-12} \text{ cm}^{-3} \text{ s}^{-1})$ ;  $v_d$  is the dry deposition speed of HONO second-order reaction,  
163 with the empirical value of  $0.02 \text{ m s}^{-1}$ ; and  $H$  is the effective mixing height of HONO,  
164 which is assumed to be 1000 m during daytime budget analysis(Gu et al., 2020; Xuan  
165 et al., 2023).

166  $L_{\text{photo}}$  is calculated by the following formula:

$$167 \quad L_{\text{photo}} = J_{\text{HONO}} \times [\text{HONO}] \quad (13)$$

168 Where  $J_{\text{HONO}}$  is the photolysis rate of HONO in this equation.

169



---

170 **Text S5 Estimation of HONO formation rate**

171 The redox reaction of NO<sub>2</sub> with SO<sub>2</sub> (R<sub>1</sub>) is considered a crucial potential source  
172 of high concentrations of HONO in Northern China (Wang et al., 2016b; Cheng,  
173 2016):

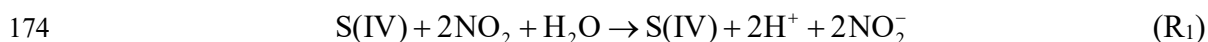

175 The rate expression for the reaction was estimated to:

$$176 \quad d[\text{S(VI)}] / dt = k_1[\text{NO}_2][\text{S(VI)}], \quad (14)$$

177 where the  $k_1 = (1.4 \times 10^5 + 1.24 \times 10^7) / 2 \text{ M}^{-1}\text{s}^{-1}$  for the pH range  $< 5$ ;

178  $k_1 = (23.25 \times (\text{pH} - 5) + 1.4 + 124) / 2 \times 10^5 \text{ M}^{-1}\text{s}^{-1}$  for the pH range  $5 < \text{pH} < 5.3$ ;

179  $k_1 = (23.25 \times (\text{pH} - 5) + 1.4 + 12.6 \times (\text{pH} - 5.3) + 124) / 2 \times 10^5 \text{ M}^{-1}\text{s}^{-1}$  for the pH range  $5.3 <$   
180  $\text{pH} < 5.8$ ;

181  $k_1 = (12.6 \times (\text{pH} - 5.3) + 124 + 20) / 2 \times 10^5 \text{ M}^{-1}\text{s}^{-1}$  for the pH range  $5.8 < \text{pH} < 8.7$ ;

182 and  $k_1 = (2 \times 10^6 + 1.67 \times 10^7) / 2 \text{ M}^{-1}\text{s}^{-1}$  for the pH range  $\text{pH} > 8.7$ . (Seinfeld et al., 1998)

183 In the above calculation formulas, the concentration of gas in the liquid is  
184 determined by Henry's constant (H<sup>\*</sup>). The calculation formula is in Table S2. SO<sub>2</sub> has  
185 a dissociation equilibrium in the solution, producing HSO<sub>3</sub><sup>-</sup> and SO<sub>3</sub><sup>2-</sup>. The ionization  
186 constants (K) are shown in the following Table S3. The H<sup>\*</sup> and K are  
187 temperature-dependent. The values are given in Table S2 and S3 under the condition  
188 of 298K, converted to the value under the actual temperature using the following  
189 calculation formula:

$$190 \quad H(\text{T}) \text{ or } K(\text{T}) = H(\text{T}_{298\text{K}}) \text{ or } K(\text{T}_{298\text{K}}) \exp \left[ -\frac{\Delta H_{298\text{K}}}{R} \left( \frac{1}{T} - \frac{1}{298\text{K}} \right) \right] \quad (15)$$

191 Where H(T)、K(T)、H(T<sub>298K</sub>), and K(T<sub>298K</sub>) represent the H<sup>\*</sup> and K at actual  
192 temperature and 298 K, respectively.

193 Influences of ionic strength on R<sub>1</sub> were not considered because of the high values  
194 predicted by the ISORROPIA-II model during the sampling periods (Cheng et al.,

---

195 2016). To evaluate the effects of mass transport, the formulation of a standard  
196 resistance model was adopted:

$$197 \quad \frac{1}{R_{\text{H, aq}}} = \frac{1}{R_{\text{aq}}} + \frac{1}{J_{\text{aq, lim}}} \quad (16)$$

198 Where  $R_{\text{H, aq}}$  is the sulfate production rate,  $R_{\text{aq}}$  is the aqueous-phase reaction rate,  
199 and  $J_{\text{aq, lim}}$  is the limiting mass transfer rate. which could be calculated by the formulas  
200 as follows:

$$201 \quad J_{\text{aq, lim}} = \min\{J_{\text{aq}}(\text{SO}_2), J_{\text{aq}}(\text{X})\} \quad (17)$$

$$202 \quad J_{\text{aq}}(\text{X}) = k_{\text{MT}}(\text{X}) \cdot [\text{X}] \quad (18)$$

203 Where  $[\text{X}]$  refers to the aqueous-phase concentrations of  $\text{SO}_2$  or the oxidants  $\text{O}_{\text{xi}}$   
204 calculated by the equation in Table S2. The mass transfer rate coefficient  $k_{\text{MT}}(\text{X})$  ( $\text{s}^{-1}$ )  
205 can be calculated by:

$$206 \quad k_{\text{MT}} = \left[ \frac{R_{\text{p}}^2}{3D_{\text{g}}} + \frac{4R_{\text{p}}}{3\alpha v} \right]^{-1} \quad (19)$$

207 Where  $R_{\text{p}}$  is the aerosol radius,  $D_{\text{g}}$  is the gas-phase molecular diffusion  
208 coefficient ( $0.2 \text{ cm}^2 \text{ s}^{-1}$  at 293K),  $v$  is the mean molecular speed of X ( $3 \times 10^4 \text{ cm s}^{-1}$ ),  
209 and  $a$  is the mass accommodation of X on the droplet surface, and we adopted values  
210 of 0.11 and  $2\text{E}^{-4}$  for  $\text{SO}_2$  and  $\text{NO}_2$ , respectively referring to Cheng et al. (Cheng,  
211 2016).

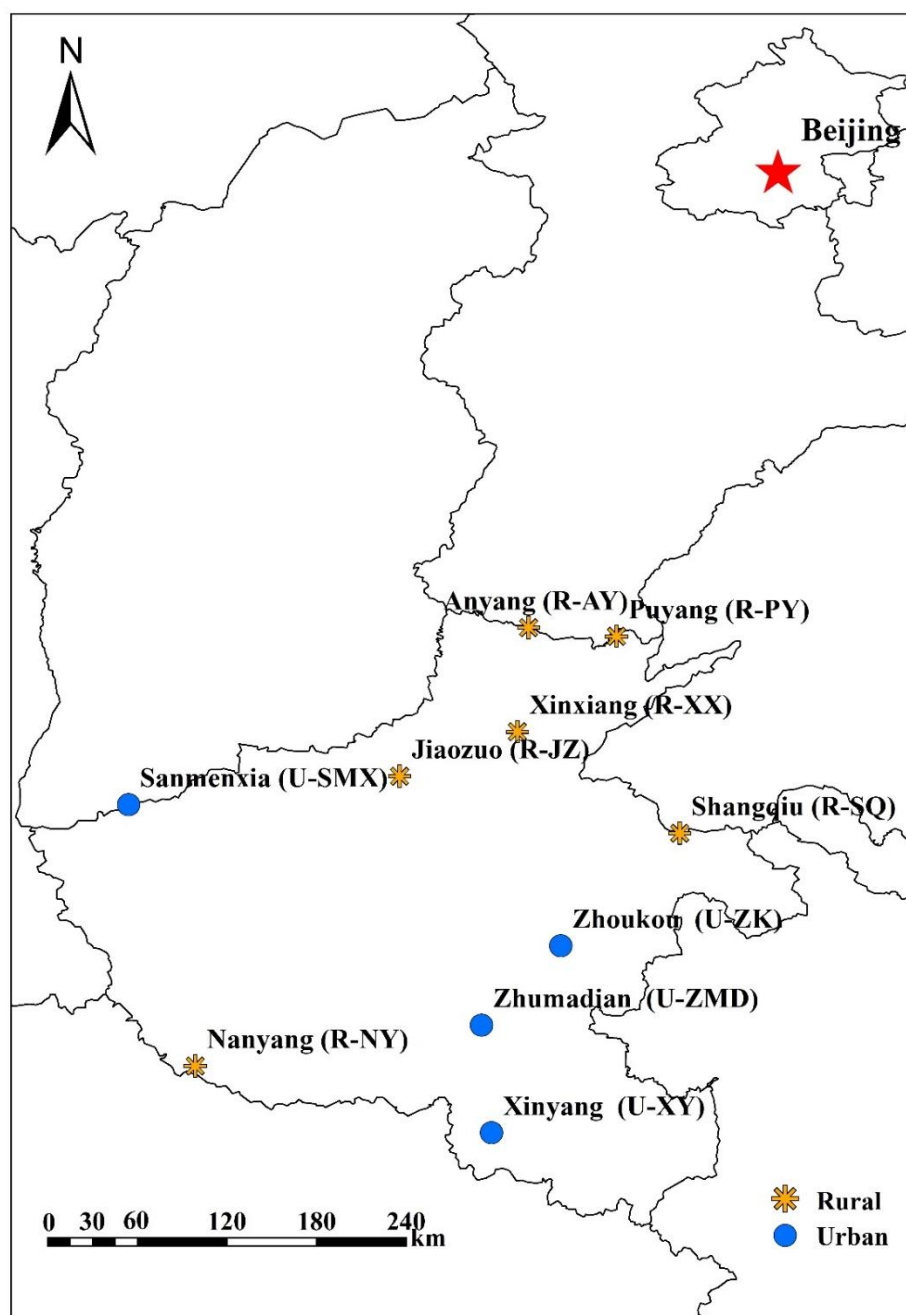

213

214

**Figure S1.** Sampling point map in Henan Province, China. © 2019 National

215

Geomatics Center of China. (i.e., urban sites at Sanmenxia (U-SMX), Zhoukou

216

(U-ZK), Zhuamadian (U-ZMD) and Xinyang (U-XY), rural sites at Anyang (R-AY),

217

Xinxiang (R-XX), Puyang (R-PY), Jiaozuo(R-JZ), Shangqiu (R-SQ) and Nanyang

218

(R-NY). All rights reserved.

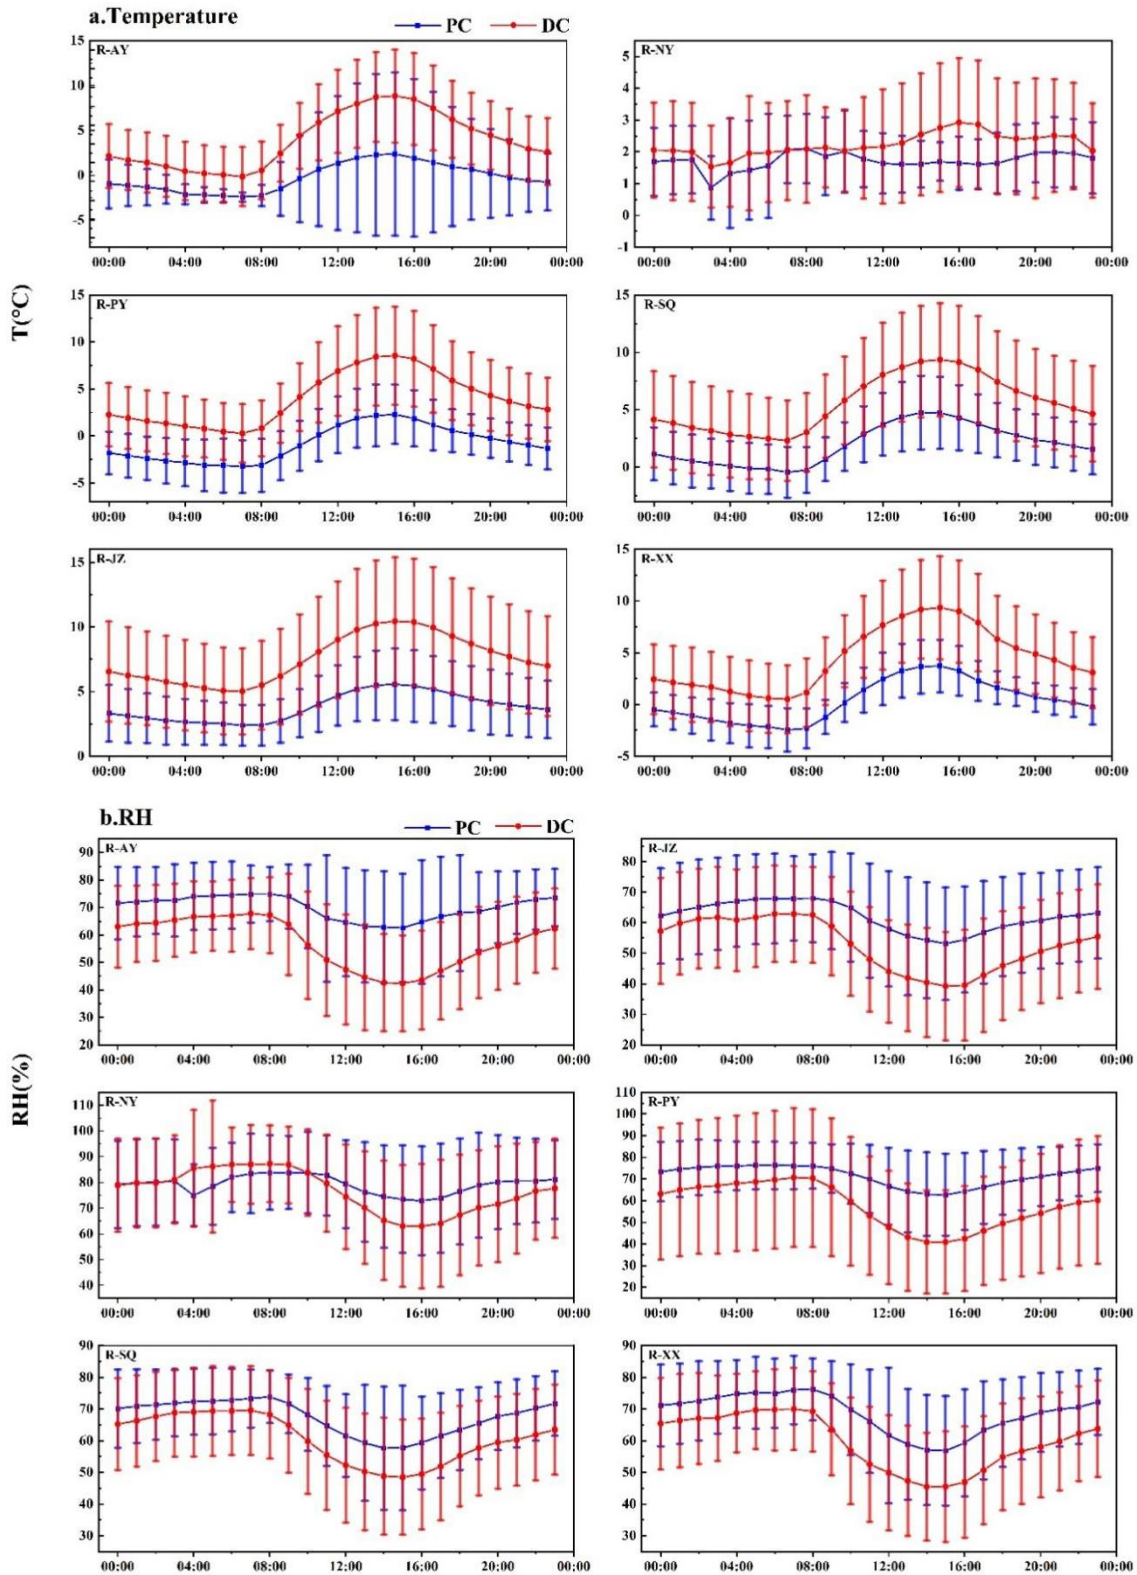

219 **Figure S2.** Daily changes in temperature and relative humidity (RH) in rural sites  
 220 before (PC) and during (DC) the COVID-19 outbreak, the error bar represents the  
 221 standard deviation. The upper and lower whiskers represent the standard deviation.

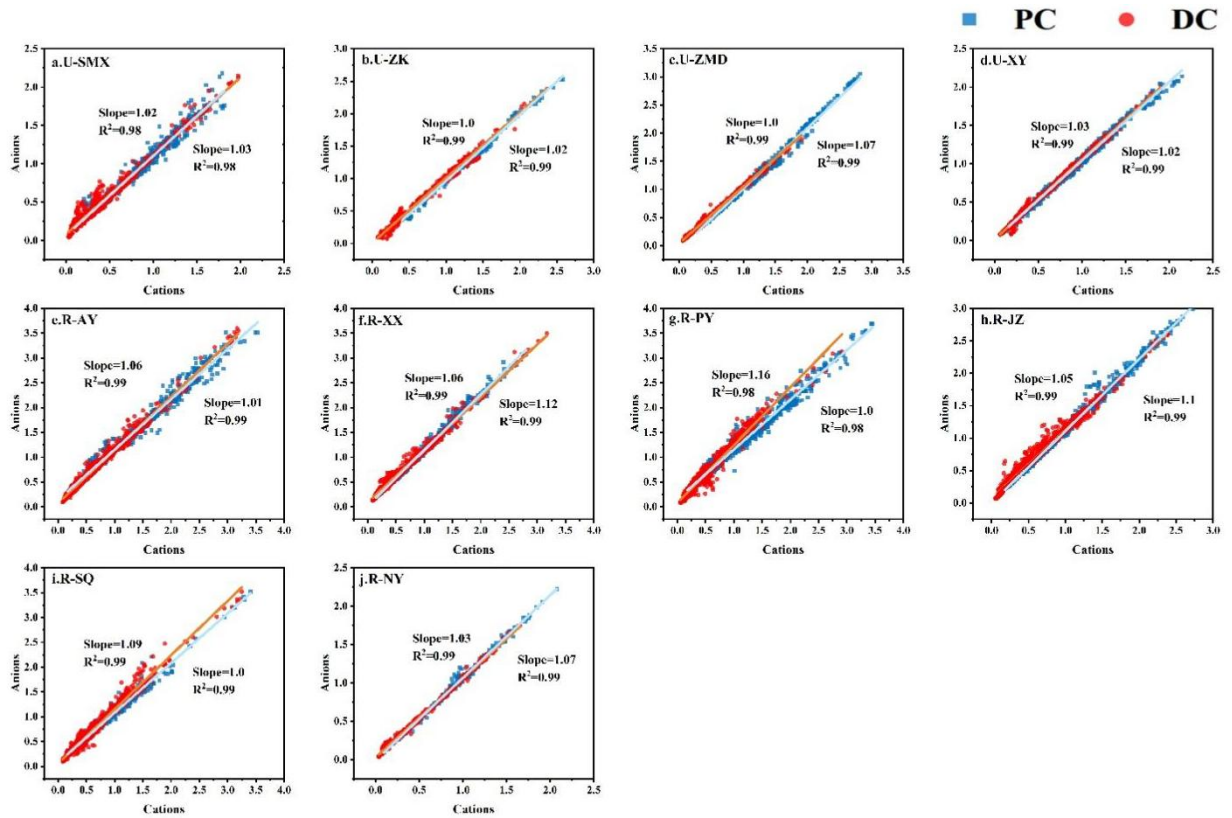

222

223 **Figure S3.** The equilibrium state of anions and cations at ten sites before (PC) and during

224

(DC) the COVID-19 outbreak.

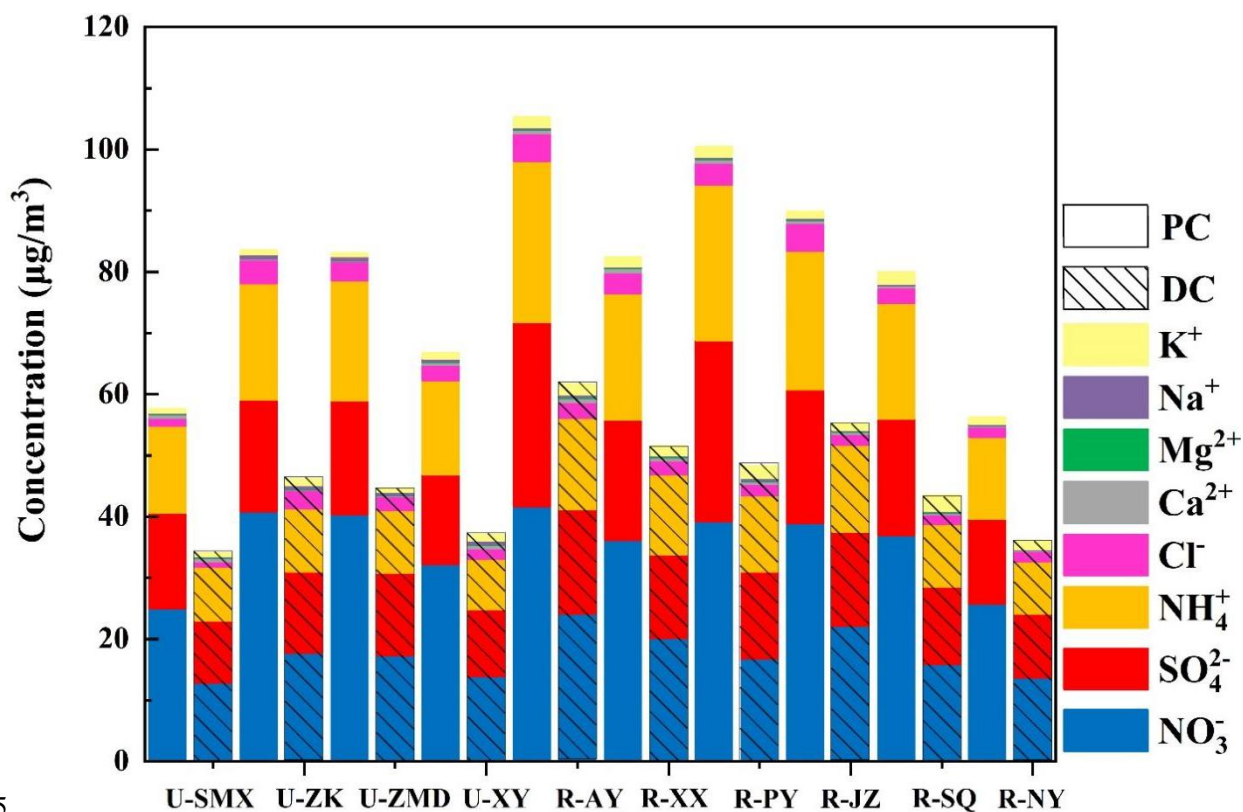

225

226

227

**Figure S4.** Concentrations of the water-soluble ions at the ten sites before (PC)

228

and during (DC) the COVID-19 outbreak.

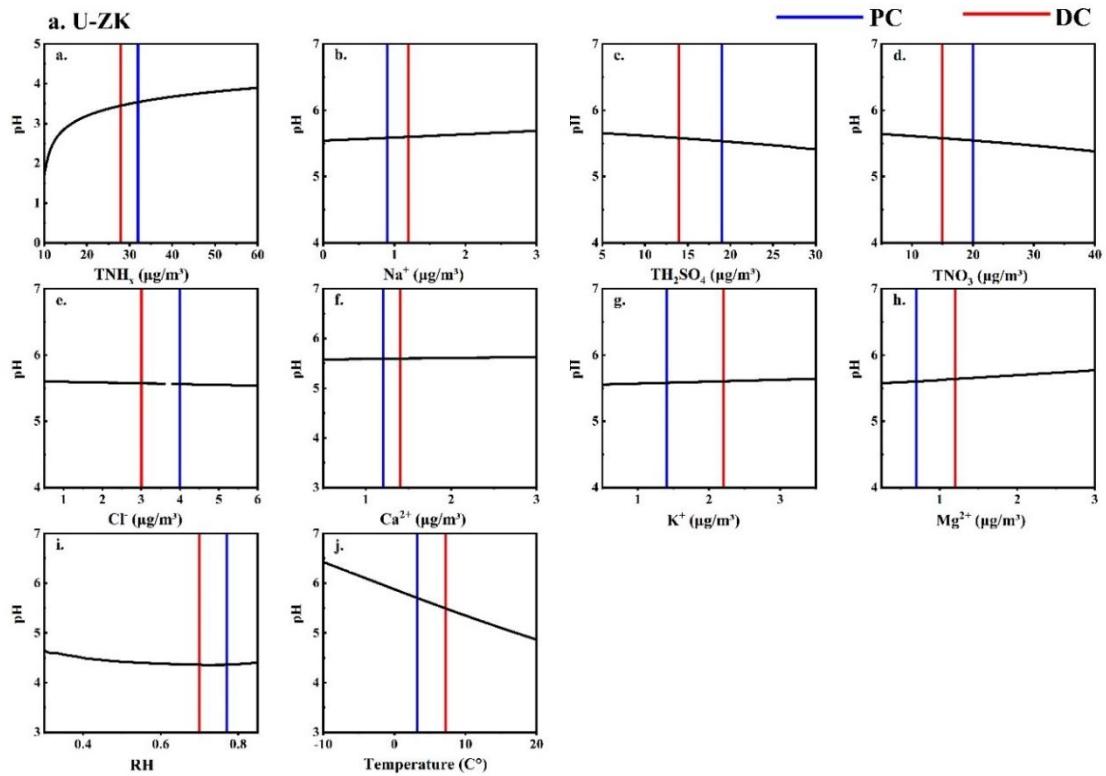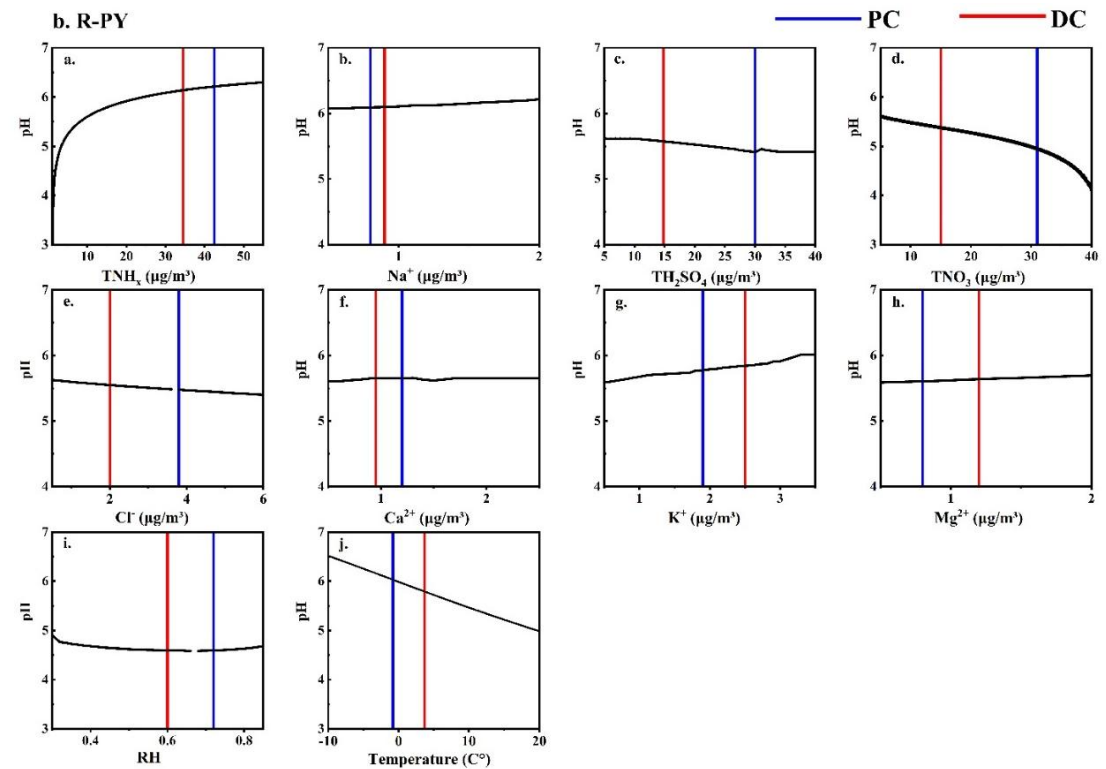

231 **Figure S5.** Sensitivity tests of pH to each factor. The vertical bar represents the mean  
 232 values before (PC) and during (DC) the COVID-19 outbreak. The real-time measured  
 233 values of a variable and the average values of other parameters were input into the  
 234 ISORROPIA II model.



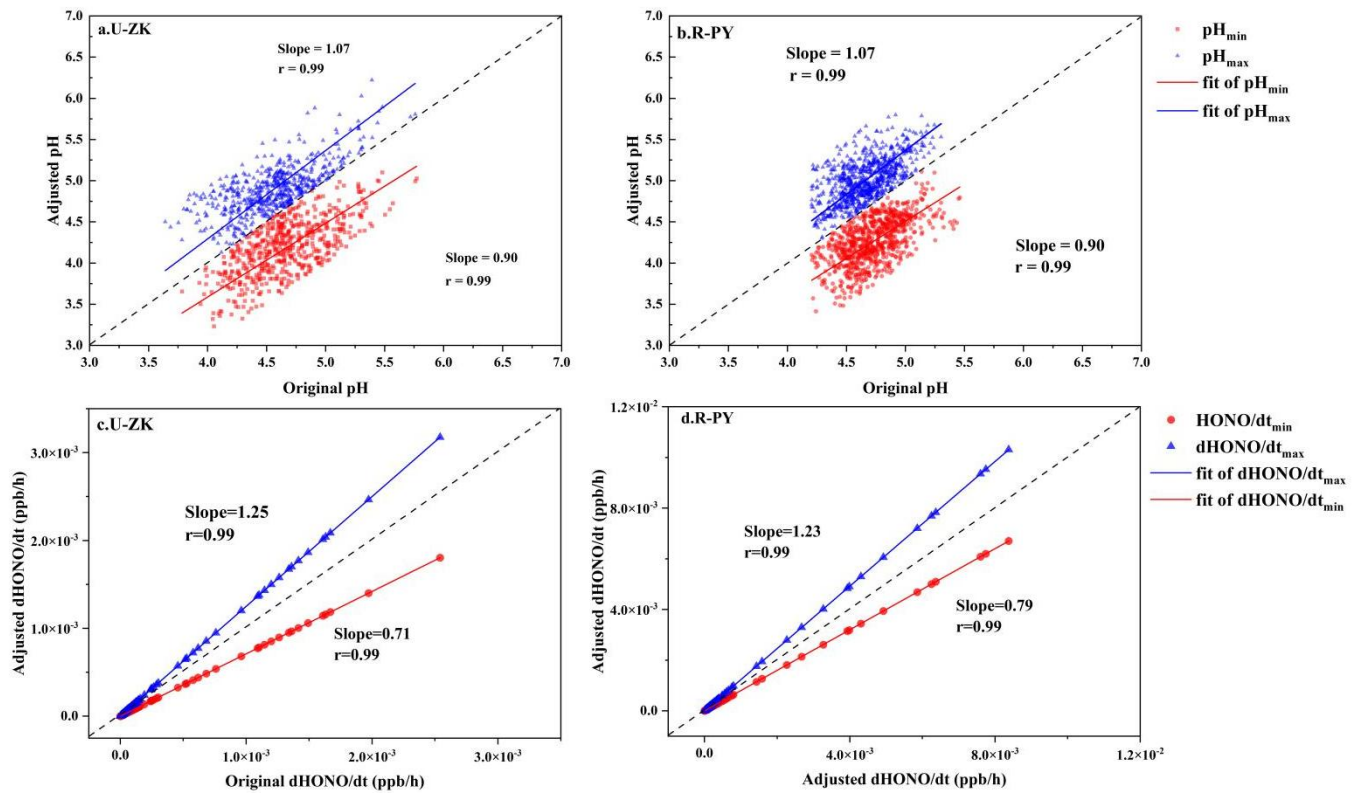

236

237 **Figure S6.** pH and  $R_1$  uncertainties at the U-ZK and R-PY sites are based on two

238

extreme scenarios of sensitivity to measurement uncertainty.

239



**a.U-ZK**

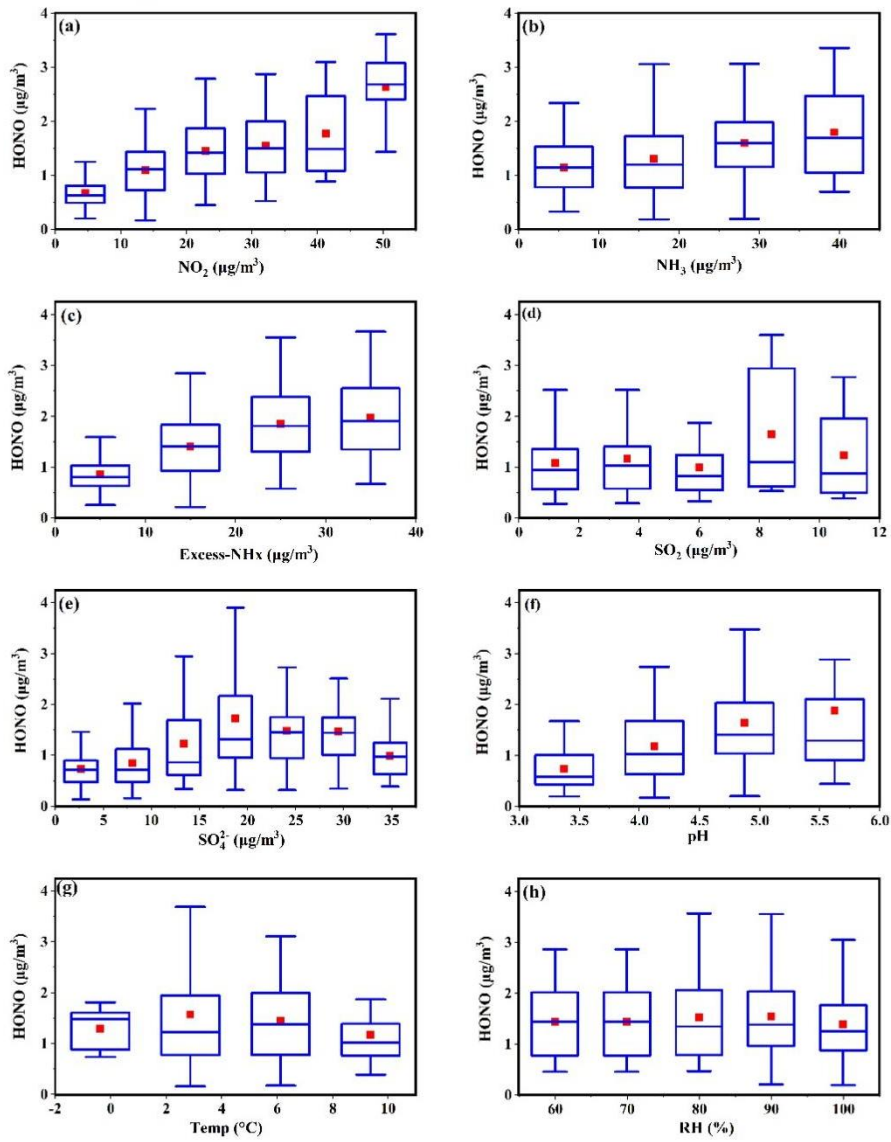

240

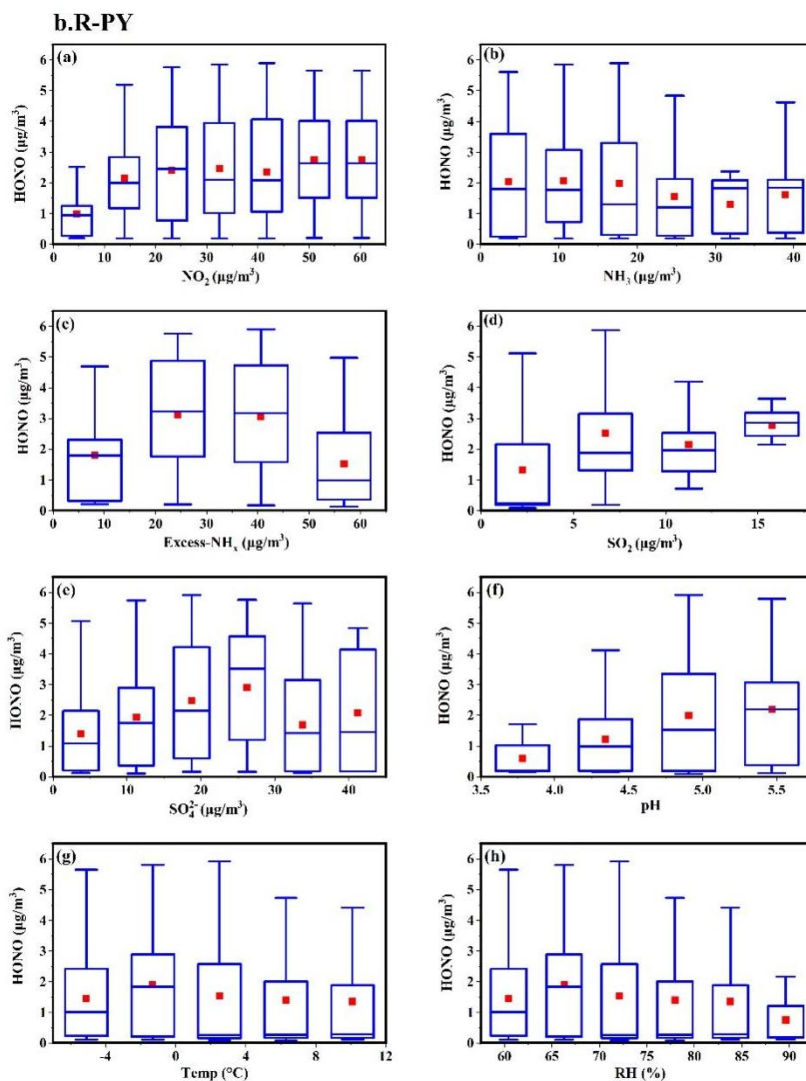

241

242

243

244

245

**Figure S7.** Relationship between HONO and main influencing factors during (DC) the COVID-19 outbreak at U-ZK and R-PY sites. Mean (red square), median (middle horizontal line), 25th and 75th percentiles (P25-P75, box), 10th and 90th percentiles (P10-P90, whiskers).

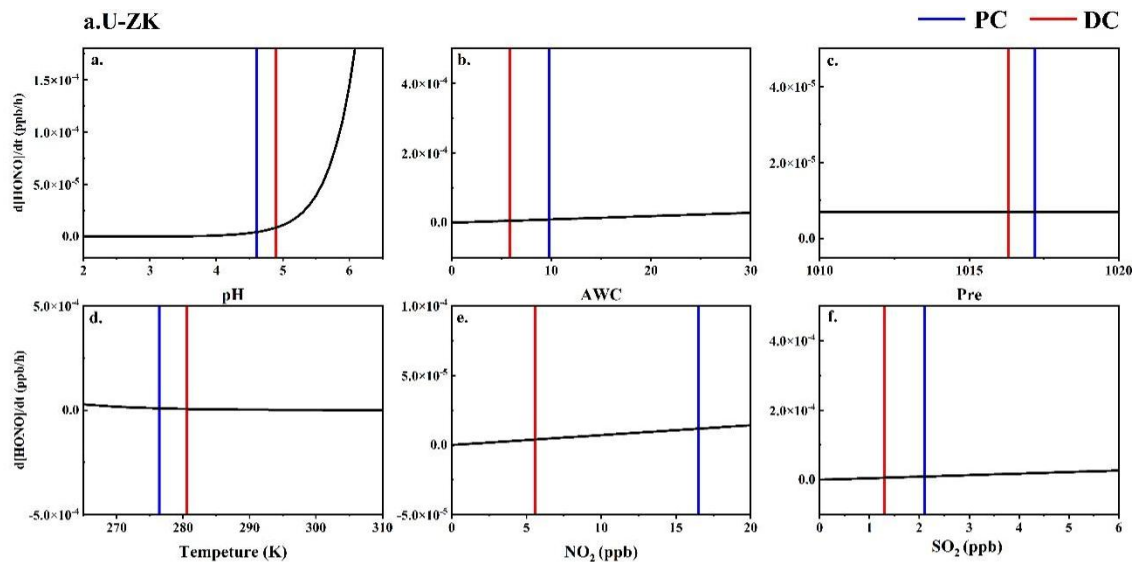

246

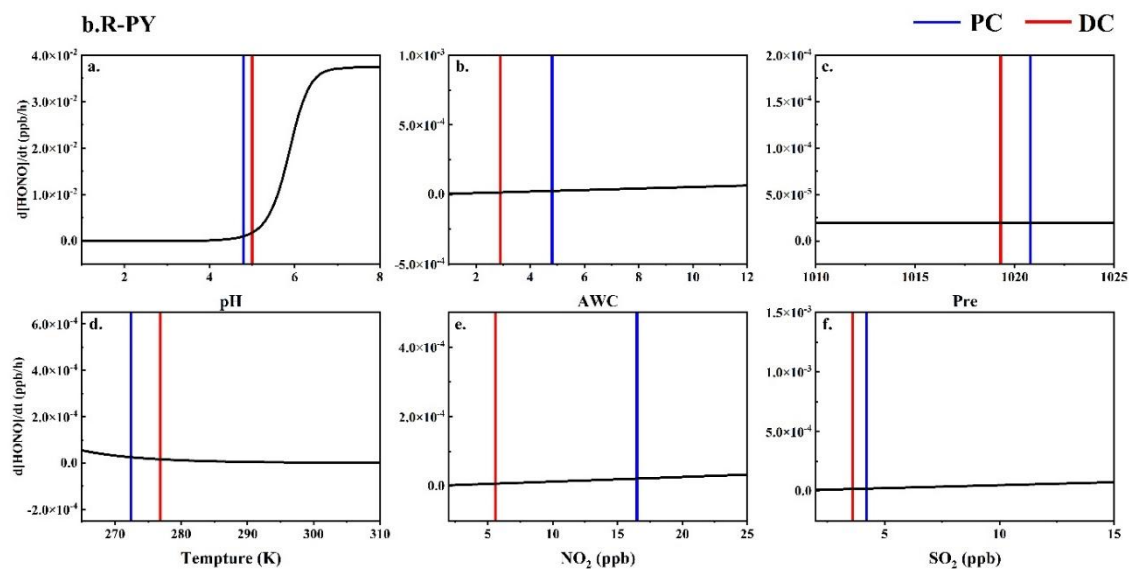

247

248 **Figure S8.** Sensitivity of HONO product rate to each factor. The vertical bar  
 249 represents the mean values before (PC) and during (DC) the COVID-19 outbreak. The  
 250 real-time measured values of a variable and the average values of other parameters  
 251 were input into the production rate of  $R_1$  reaction.

252

**Tables**

253

**Table S1.** Descriptions of the ten sampling sites in Henan Province, China.

| Observation sites | Classifications | Abbreviations | Coordinates         | Locations                                                                | Surrounding environment                  |
|-------------------|-----------------|---------------|---------------------|--------------------------------------------------------------------------|------------------------------------------|
| Sanmenxia         | Urban site      | U-SMX         | 34.79 °N, 111.16 °E | Sanmenxia Environmental Protection Bureau                                | Roads, residential areas                 |
| Zhoukou           | Urban site      | U-ZK          | 33.65° N, 114.65° E | Chuanhui District People's Government                                    | Roads, residential areas                 |
| Zhumadian         | Urban site      | U-ZMD         | 33.01° N, 114.01° E | Huanghuai College                                                        | Roads, residential areas, shopping malls |
| Xinyang           | Urban site      | U-XY          | 32.14° N, 114.09° E | Xinyang Museum                                                           | Roads, residential areas, shopping malls |
| Anyang            | Rural site      | R-AY          | 36.22°N, 114.39° E  | Baizhuang Town Xindian North Street China Resources Gas (Andan Station)  | Highways, villages, farmland             |
| Xinxiang          | Rural site      | R-XX          | 35.38° N, 114.30° E | Banzao Township Central School in Yanjin County                          | Villages, farmland                       |
| Puyang            | Rural site      | R-PY          | 36.15° N, 115.10° E | Nanle County Longwang Temple Station                                     | Villages, farmland                       |
| Jiaozuo           | Rural site      | R-JZ          | 35.02° N, 113.35° E | The Second River Bureau of Jiefeng Village, Beiguo Township, Wuxi County | Villages, farmland                       |
| Shangqiu          | Rural site      | R-SQ          | 34.56° N, 115.61° E | Liangyuan Huanghe Gudao National Forest Park                             | Highways, villages, farmland             |
| Nanyang           | Rural site      | R-NY          | 32.68° N, 111.70° E | Nanyang Tangshan Park                                                    | Villages, farmland                       |

254

255

**Table S2.** Constants for calculating the apparent Henry's constant ( $H^*$ ).

| Equilibrium                                | H (M atm <sup>-1</sup> ) at 298K | $-\Delta H_{298K}/R$ (K) |
|--------------------------------------------|----------------------------------|--------------------------|
| SO <sub>2</sub> (g) ↔ SO <sub>2</sub> (aq) | 1.23                             | 3145.3                   |
| NO <sub>2</sub> (g) ↔ NO <sub>2</sub> (aq) | 1.00E-02                         | 2516.2                   |

256

257

**Table S3.** Constants for calculating the ionization constants (K).

| Equilibrium                                                                        | K (M) at 298K | $-\Delta H_{298K}/R$ (K) |
|------------------------------------------------------------------------------------|---------------|--------------------------|
| SO <sub>2</sub> ·H <sub>2</sub> O ↔ H <sup>+</sup> + HSO <sub>3</sub> <sup>-</sup> | 1.30E-02      | 1960                     |
| HSO <sub>3</sub> <sup>-</sup> ↔ H <sup>+</sup> + SO <sub>3</sub> <sup>2-</sup>     | 6.60E-08      | 1500                     |

258

259 **Table S4.** Comparisons of NH<sub>3</sub> concentrations (mean ± standard deviation) (µg/m<sup>3</sup>)  
 260 from studies in other cities.

261

| Sampling sites         | Seasons | Years     | NH <sub>3</sub> (µg/m <sup>3</sup> ) | Sites | References                  |
|------------------------|---------|-----------|--------------------------------------|-------|-----------------------------|
| Delhi, India           | Winter  | 2013–2015 | 19.2 ± 3.5                           | Urban | [(Saraswati et al., 2019)]  |
| Osaka, Japan           | Winter  | 2015      | 1.5 ± 0.7                            | Urban | [(Huy et al., 2017)]        |
| Toronto, Canada        | Winter  | 2007      | 0.8 ± 0.5                            | Urban | [(Hu et al., 2014)]         |
| Kanpur, India          | Winter  | 2007      | 21.7 ± 5.8                           | Urban | [(Behera and Sharma, 2010)] |
| Nanjing                | Winter  | 2014      | 6.7                                  | Urban | [(Wang et al., 2016b)]      |
| Yangtze River<br>Delta | Winter  | 2019      | 9.3 ± 4.0                            | Urban | [(Wang et al., 2021)]       |
| Shanghai               | Winter  | 2014      | 2.8 ± 1.0                            | Urban | [(Wang et al., 2018)]       |
| Tianjin                | Winter  | 2015      | 12.0                                 | Urban | [(Shi et al., 2019)]        |
| Xi'an                  | Winter  | 2012      | 17.5 ± 9.1                           | Urban | [(Wang et al., 2016a)]      |
| Fujian                 | Winter  | 2016      | 12.8 ± 4.8                           | Urban | [(Wu et al., 2017)]         |
| Beijing                | Winter  | 2015      | 15.1 ± 2.9                           | Urban | [(Wang et al., 2016a)]      |
| Beijing                | Winter  | 2017      | 13.1 ± 1.6                           | Urban | [(Zhang et al., 2020b)]     |
| Beijing                | Winter  | 2020      | 19.9 ± 3.8                           | Urban | [(Zhang et al., 2020b)]     |
| Taoyuan                | Winter  | 2017–2018 | 1.7 ± 1.9                            | Urban | [(Duan et al., 2021)]       |
| Zhengzhou              | Winter  | 2018      | 19.0 ± 4.0                           | Rural | [(Wang et al., 2020)]       |
| Quzhou                 | Winter  | 2019      | 29.5 ± 2.2                           | Rural | [(Feng et al., 2022)]       |
| Gucheng                | Winter  | 2016      | 9.3                                  | Rural | [(Xu et al., 2019)]         |
| Chongming              | Winter  | 2019–2020 | 9.3 ± 4.0                            | Rural | [(Lv et al., 2022)]         |
| Shanglan               | Winter  | 2017–2018 | 2.5 ± 2.6                            | Rural | [(Duan et al., 2021)]       |

262

**Table S5.** The concentration (mean  $\pm$  standard deviation) of relative humidity

263

(RH), temperature (T),  $\epsilon(\text{NH}_4^+)$  at the ten sites before (PC) and during (DC) the

264

COVID-19 outbreak.

| Sites | Substances                | Total           | PC              | DC              |
|-------|---------------------------|-----------------|-----------------|-----------------|
| U-SMX | RH (%)                    | 54.8 $\pm$ 18.0 | 60.6 $\pm$ 16.5 | 51.2 $\pm$ 18.0 |
|       | T ( $^{\circ}\text{C}$ )  | 5.6 $\pm$ 4.2   | 3.1 $\pm$ 2.1   | 7.0 $\pm$ 4.4   |
|       | $\epsilon(\text{NH}_4^+)$ | 0.43 $\pm$ 0.20 | 0.54 $\pm$ 0.18 | 0.36 $\pm$ 0.18 |
| U-ZK  | RH (%)                    | 70.1 $\pm$ 21.9 | 73.6 $\pm$ 14.5 | 69.4 $\pm$ 22.4 |
|       | T ( $^{\circ}\text{C}$ )  | 6.4 $\pm$ 4.3   | 3.8 $\pm$ 2.3   | 7.0 $\pm$ 4.5   |
|       | $\epsilon(\text{NH}_4^+)$ | 0.43 $\pm$ 0.20 | 0.59 $\pm$ 0.14 | 0.32 $\pm$ 0.17 |
| U-ZMD | RH (%)                    | 74.9 $\pm$ 23.3 | 84.4 $\pm$ 17.8 | 68.9 $\pm$ 24.4 |
|       | T ( $^{\circ}\text{C}$ )  | 5.6 $\pm$ 4.6   | 2.9 $\pm$ 2.7   | 7.4 $\pm$ 4.8   |
|       | $\epsilon(\text{NH}_4^+)$ | 0.48 $\pm$ 0.21 | 0.62 $\pm$ 0.17 | 0.38 $\pm$ 0.18 |
| U-XY  | RH (%)                    | 77.0 $\pm$ 22.1 | 86.7 $\pm$ 13.3 | 74.3 $\pm$ 23.3 |
|       | T ( $^{\circ}\text{C}$ )  | 7.7 $\pm$ 4.5   | 4.7 $\pm$ 2.2   | 8.5 $\pm$ 4.6   |
|       | $\epsilon(\text{NH}_4^+)$ | 0.55 $\pm$ 0.21 | 0.71 $\pm$ 0.14 | 0.45 $\pm$ 0.18 |
| R-AY  | RH (%)                    | 62.2 $\pm$ 17.9 | 70.1 $\pm$ 14.9 | 57.2 $\pm$ 17.8 |
|       | T ( $^{\circ}\text{C}$ )  | 2.6 $\pm$ 0.9   | -0.2 $\pm$ 2.5  | 4.4 $\pm$ 4.7   |
|       | $\epsilon(\text{NH}_4^+)$ | 0.46 $\pm$ 0.17 | 0.57 $\pm$ 0.15 | 0.39 $\pm$ 0.14 |
| R-XX  | RH (%)                    | 63.0 $\pm$ 17.0 | 68.7 $\pm$ 14.6 | 59.5 $\pm$ 17.5 |
|       | T ( $^{\circ}\text{C}$ )  | 2.9 $\pm$ 4.6   | 0.3 $\pm$ 2.8   | 4.4 $\pm$ 4.8   |
|       | $\epsilon(\text{NH}_4^+)$ | 0.40 $\pm$ 0.17 | 0.52 $\pm$ 0.16 | 0.35 $\pm$ 0.14 |
| R-PY  | RH (%)                    | 63.6 $\pm$ 18.0 | 71.5 $\pm$ 14.6 | 57.6 $\pm$ 18.0 |
|       | T ( $^{\circ}\text{C}$ )  | 1.7 $\pm$ 4.8   | -0.8 $\pm$ 3.2  | 3.6 $\pm$ 4.9   |
|       | $\epsilon(\text{NH}_4^+)$ | 0.43 $\pm$ 0.17 | 0.58 $\pm$ 0.13 | 0.34 $\pm$ 0.13 |
| R-JZ  | RH (%)                    | 56.3 $\pm$ 18.5 | 62.0 $\pm$ 16.7 | 52.8 $\pm$ 18.7 |
|       | T ( $^{\circ}\text{C}$ )  | 4.1 $\pm$ 4.4   | 1.7 $\pm$ 2.6   | 5.6 $\pm$ 4.7   |
|       | $\epsilon(\text{NH}_4^+)$ | 0.37 $\pm$ 0.14 | 0.46 $\pm$ 0.13 | 0.32 $\pm$ 0.13 |
| R-SQ  | RH (%)                    | 63.2 $\pm$ 15.6 | 67.5 $\pm$ 12.6 | 60.5 $\pm$ 17.0 |
|       | T ( $^{\circ}\text{C}$ )  | 4.2 $\pm$ 4.5   | 2.0 $\pm$ 2.9   | 5.6 $\pm$ 4.7   |
|       | $\epsilon(\text{NH}_4^+)$ | 0.45 $\pm$ 0.19 | 0.63 $\pm$ 0.12 | 0.35 $\pm$ 0.14 |
| R-NY  | RH (%)                    | 75.9 $\pm$ 19.1 | 79.3 $\pm$ 17.7 | 73.9 $\pm$ 19.6 |
|       | T ( $^{\circ}\text{C}$ )  | 5.7 $\pm$ 3.8   | 3.6 $\pm$ 2.6   | 6.9 $\pm$ 3.9   |
|       | $\epsilon(\text{NH}_4^+)$ | 0.59 $\pm$ 0.19 | 0.73 $\pm$ 0.12 | 0.52 $\pm$ 0.18 |

265

266

**Table S6.** The concentration (mean  $\pm$  standard deviation) of required ammonia

267

(Required-NH<sub>x</sub>) and excess ammonia (Excess-NH<sub>x</sub>) at the ten sites before (PC) and

268

during (DC) the COVID-19 outbreak.

| Sites | Substances                            | Total ( $\mu\text{g}/\text{m}^3$ ) | PC ( $\mu\text{g}/\text{m}^3$ ) | DC ( $\mu\text{g}/\text{m}^3$ ) |
|-------|---------------------------------------|------------------------------------|---------------------------------|---------------------------------|
| U-SMX | Required-NH <sub>4</sub> <sup>+</sup> | 9.1 $\pm$ 7.1                      | 12.7 $\pm$ 7.1                  | 7.0 $\pm$ 6.2                   |
|       | Excess-NH <sub>4</sub> <sup>+</sup>   | 14.7 $\pm$ 11.2                    | 13.6 $\pm$ 10.4                 | 15.3 $\pm$ 11.6                 |
| U-ZK  | Required-NH <sub>4</sub> <sup>+</sup> | 15.2 $\pm$ 9.6                     | 21.4 $\pm$ 8.6                  | 11.6 $\pm$ 8.4                  |
|       | Excess-NH <sub>4</sub> <sup>+</sup>   | 14.6 $\pm$ 8.3                     | 11.9 $\pm$ 6.0                  | 16.1 $\pm$ 9.0                  |
| U-ZMD | Required-NH <sub>4</sub> <sup>+</sup> | 13.9 $\pm$ 9.8                     | 19.4 $\pm$ 9.8                  | 10.4 $\pm$ 8.0                  |
|       | Excess-NH <sub>4</sub> <sup>+</sup>   | 12.8 $\pm$ 8.7                     | 11.6 $\pm$ 8.2                  | 13.6 $\pm$ 8.8                  |
| U-XY  | Required-NH <sub>4</sub> <sup>+</sup> | 10.2 $\pm$ 7.5                     | 14.6 $\pm$ 7.3                  | 7.4 $\pm$ 6.2                   |
|       | Excess-NH <sub>4</sub> <sup>+</sup>   | 7.8 $\pm$ 4.6                      | 6.5 $\pm$ 4.4                   | 8.7 $\pm$ 4.5                   |
| R-AY  | Required-NH <sub>4</sub> <sup>+</sup> | 17.1 $\pm$ 12.4                    | 23.9 $\pm$ 13.4                 | 12.8 $\pm$ 9.5                  |
|       | Excess-NH <sub>4</sub> <sup>+</sup>   | 21.2 $\pm$ 9.4                     | 20.2 $\pm$ 9.2                  | 21.9 $\pm$ 9.4                  |
| R-XX  | Required-NH <sub>4</sub> <sup>+</sup> | 13.5 $\pm$ 9.6                     | 18.0 $\pm$ 9.8                  | 10.7 $\pm$ 8.2                  |
|       | Excess-NH <sub>4</sub> <sup>+</sup>   | 23.3 $\pm$ 11.4                    | 19.6 $\pm$ 10.8                 | 25.6 $\pm$ 11.2                 |
| R-PY  | Required-NH <sub>4</sub> <sup>+</sup> | 13.8 $\pm$ 11.0                    | 22.1 $\pm$ 12.5                 | 9.3 $\pm$ 6.6                   |
|       | Excess-NH <sub>4</sub> <sup>+</sup>   | 22.3 $\pm$ 10.8                    | 17.5 $\pm$ 8.6                  | 25.0 $\pm$ 11.0                 |
| R-JZ  | Required-NH <sub>4</sub> <sup>+</sup> | 15.4 $\pm$ 10.4                    | 20.3 $\pm$ 10.6                 | 12.5 $\pm$ 9.1                  |
|       | Excess-NH <sub>4</sub> <sup>+</sup>   | 27.5 $\pm$ 12.9                    | 26.0 $\pm$ 13.1                 | 28.4 $\pm$ 12.7                 |
| R-SQ  | Required-NH <sub>4</sub> <sup>+</sup> | 13.2 $\pm$ 9.1                     | 19.1 $\pm$ 8.9                  | 9.9 $\pm$ 7.3                   |
|       | Excess-NH <sub>4</sub> <sup>+</sup>   | 15.1 $\pm$ 8.6                     | 10.1 $\pm$ 5.4                  | 17.9 $\pm$ 8.7                  |
| R-NY  | Required-NH <sub>4</sub> <sup>+</sup> | 9.9 $\pm$ 6.6                      | 13.0 $\pm$ 6.9                  | 8.1 $\pm$ 5.8                   |
|       | Excess-NH <sub>4</sub> <sup>+</sup>   | 6.0 $\pm$ 3.6                      | 4.4 $\pm$ 3.3                   | 6.9 $\pm$ 3.4                   |

269



270 **Table S7.** Comparison of the particle pH values in this study (mean  $\pm$  standard)  
 271 deviation during the COVID-19 outbreak (DC) and other sites (mean or mean  $\pm$   
 272 standard).

|          | Observation Sites | Periods           | pH            | References            |
|----------|-------------------|-------------------|---------------|-----------------------|
| Urban    | Sanmenxia         | Jan–Feb 2020      | 4.8 $\pm$ 0.9 |                       |
|          | Zhoukou           | Jan–Feb 2020      | 5.1 $\pm$ 0.4 |                       |
|          | Zhumadian         | Jan–Feb 2020      | 4.8 $\pm$ 1.2 |                       |
|          | Xinyang           | Jan–Feb 2020      | 4.6 $\pm$ 1.3 |                       |
| Rural    | Anyang            | Jan–Feb 2020      | 4.6 $\pm$ 0.8 | This study (DC)       |
|          | Xinxiang          | Jan–Feb 2020      | 4.8 $\pm$ 0.9 |                       |
|          | Puyang            | Jan–Feb 2020      | 4.9 $\pm$ 0.9 |                       |
|          | Jiaozuo           | Jan–Feb 2020      | 5.0 $\pm$ 0.8 |                       |
|          | Shangqiu          | Jan–Feb 2020      | 4.6 $\pm$ 0.8 |                       |
|          | Nanyang           | Jan–Feb 2020      | 4.3 $\pm$ 0.7 |                       |
| Urban    | Beijing           | Jan–Feb 2015      | 4.5           | [(Guo et al., 2017)]  |
|          | Beijing           | Dec 2016          | 4.3 $\pm$ 0.4 | [(Liu et al., 2017)]  |
|          | Beijing           | Feb 2017          | 4.5 $\pm$ 0.7 | [(Ding et al., 2019)] |
|          | Tianjin           | Dec–Jun 2015      | 4.9 $\pm$ 1.4 | [(Shi et al., 2017)]  |
|          | Tianjin           | Aug 2015          | 3.4 $\pm$ 0.5 | [(Shi et al., 2019)]  |
|          | Hohhot            | Winter            | 5.7           | [(Wang et al., 2019)] |
|          | Mt. Tai           | Summer            | 2.9 $\pm$ 0.5 | [(Liu et al., 2021)]  |
|          | Taoyuan           | Nov 2017–Jan 2018 | 5.1 $\pm$ 1.0 | [(Duan et al., 2021)] |
|          | Zhengzhou         | Jan 2018          | 4.5           | [(Wang et al., 2020)] |
|          | Anyang            | Jan 2018          | 4.8           | [(Wang et al., 2020)] |
| Mountain | Mt. Tai           | Summer            | 3.6 $\pm$ 0.7 | [(Liu et al., 2021)]  |
| Rural    | Shanglan          | Nov 2017–Jan 2018 | 5.5 $\pm$ 1.1 | [(Duan et al., 2021)] |

---

274 **References**

- 275 Ding, J., Zhao, P., Su, J., Dong, Q., Du, X., and Zhang, Y.: Aerosol pH and its driving  
276 factors in Beijing, *Atmos. Chem. Phys.* 19, 7939 – 7954,  
277 <https://doi.org/10.5194/acp-19-7939-2019>, 2019.
- 278 Duan, X., Yan, Y., Peng, L., Xie, K., Hu, D., Li, R., and Wang, C.: Role of ammonia  
279 in secondary inorganic aerosols formation at an ammonia-rich city in winter in  
280 north China: A comparative study among industry, urban, and rural sites, *Environ.*  
281 *Pollut.*, 291, 118151, <https://doi.org/10.1016/j.envpol.2021.118151>, 2021.
- 282 Feng, S., Xu, W., Cheng, M., Ma, Y., Wu, L., Kang, J., Wang, K., Tang, A., Collett, J.  
283 L., Fang, Y., Goulding, K., Liu, X., and Zhang, F.: Overlooked nonagricultural  
284 and wintertime agricultural NH<sub>3</sub> emissions in Quzhou county, North China Plain:  
285 evidence from <sup>15</sup>N-Stable Isotopes. *Environ. Sci. Technol. Lett.* 9, 127 – 133,  
286 <https://doi.org/10.1021/acs.estlett.1c00935>, 2022.
- 287 Gu, R., Zheng, P., Chen, T., Dong, C., Wang, Y. n., Liu, Y., Liu, Y., Luo, Y., Han, G.,  
288 Wang, X., Zhou, X., Wang, T., Wang, W., and Xue, L.: Atmospheric nitrous acid  
289 (HONO) at a rural coastal site in North China: Seasonal variations and effects of  
290 biomass burning, *Atmos. Environ.*, 229,  
291 <https://doi.org/10.1016/j.atmosenv.2020.117429>, 2020.
- 292 Guo, H., Weber, R. J., and Nenes, A.: High levels of ammonia do not raise fine  
293 particle pH sufficiently to yield nitrogen oxide-dominated sulfate production, *Sci.*  
294 *Rep.*, 7, 12109, <https://doi.org/10.1038/s41598-017-11704-0>, 2017.
- 295 Hao, Q., Jiang, N., Zhang, R., Yang, L., and Li, S.: Characteristics, sources, and  
296 reactions of nitrous acid during winter at an urban site in the Central Plains  
297 Economic Region in China, *Atmos. Chem. Phys.* 20, 7087 – 7102,  
298 <https://doi.org/10.5194/acp-20-7087-2020>, 2020.
- 299 HOFZUMAHAUS, T. B. a.: Latitudinal variation of measured NO<sub>2</sub> photolysis  
300 frequencies over the Atlantic Ocean between 50° N and 30° S., *J. Atmos. Chem.*

---

301 15, 269 – 282, <https://doi.org/10.1007/bf00115398>, 1992.

302 Hu, Q., Zhang, L., Evans, G. J., and Yao, X.: Variability of atmospheric ammonia  
303 related to potential emission sources in downtown Toronto, Canada, *Atmos.*  
304 *Environ.* 99, 365 – 373, <https://doi.org/10.1016/j.atmosenv.2014.10.006>, 2014.

305 Huang, R.-J., Yang, L., Cao, J., Wang, Q., Tie, X., Ho, K.-F., Shen, Z., Zhang, R., Li,  
306 G., Zhu, C., Zhang, N., Dai, W., Zhou, J., Liu, S., Chen, Y., Chen, J., and  
307 O'Dowd, C. D.: Concentration and sources of atmospheric nitrous acid (HONO)  
308 at an urban site in Western China, *Sci. Total. Environ.* 02, 165 – 172.  
309 <https://doi.org/10.1016/j.scitotenv.2017.02.166>, 2017.

310 Huy, D. H., Thanh, L. T., Hien, T. T., Noro, K., and Takenaka, N.: Characteristics of  
311 ammonia gas and fine particulate ammonium from two distinct urban areas:  
312 Osaka, Japan, and Ho Chi Minh City, Vietnam, *Environ Environ. Sci. Pollut. Res.*  
313 *Int.* 24, 8147 – 8163, <https://doi.org/10.1007/s11356-017-8496-5>, 2017.

314 Kramer, L. J., Crilley, L. R., Adams, T. J., Ball, S. M., Pope, F. D., and Bloss, W. J.:  
315 Nitrous acid (HONO) emissions under real-world driving conditions from  
316 vehicles in a UK road tunnel, *Atmos. Chem. Phys.* 20, 5231 – 5248,  
317 <https://doi.org/10.5194/acp-20-5231-2020>, 2020.

318 Liu, M., Song, Y., Zhou, T., Xu, Z., Yan, C., Zheng, M., Wu, Z., Hu, M., Wu, Y., and  
319 Zhu, T.: Fine particle pH during severe haze episodes in northern China,  
320 *Geophys. Res. Lett.* 44, 5213 – 5221, <https://doi.org/10.1002/2017gl073210>,  
321 2017.

322 Liu, P., Zhao, X., Zhang, C., Chen, H., Wang, J., Xue, L., Chen, J., and Mu, Y.: Fine  
323 particle pH and its influencing factors during summer at Mt. Tai: Comparison  
324 between mountain and urban sites, *Atmos. Environ.*, 261,  
325 <https://doi.org/10.1016/j.atmosenv.2021.118607>, 2021.

326 Liu, Y., Ni, S., Jiang, T., Xing, S., Zhang, Y., Bao, X., Feng, Z., Fan, X., Zhang, L.,  
327 and Feng, H.: Influence of Chinese New Year overlapping COVID-19 lockdown  
328 on HONO sources in Shijiazhuang, *Sci. Total Environ.*, 745, 141025,

---

329 <https://doi.org/10.1016/j.scitotenv.2020.141025>, 2020a.

330 Liu, Y., Zhang, Y., Lian, C., Yan, C., Feng, Z., Zheng, F., Fan, X., Chen, Y., Wang, W.,  
331 Chu, B., Wang, Y., Cai, J., Du, W., Daellenbach, K. R., Kangasluoma, J., Bianchi,  
332 F., Kujansuu, J., Petäjä, T., Wang, X., Hu, B., Wang, Y., Ge, M., He, H., and  
333 Kulmala, M.: The promotion effect of nitrous acid on aerosol formation in  
334 wintertime in Beijing: the possible contribution of traffic-related emissions,  
335 *Atmos. Chem. Phys.* 20, 13023 – 13040,  
336 <https://doi.org/10.5194/acp-20-13023-2020>, 2020b.

337 Lv, S., Wang, F., Wu, C., Chen, Y., Liu, S., Zhang, S., Li, D., Du, W., Zhang, F., Wang,  
338 H., Huang, C., Fu, Q., Duan, Y., and Wang, G.: Gas-to-aerosol phase partitioning  
339 of atmospheric water-soluble organic compounds at a rural site in China: an  
340 enhancing effect of NH<sub>3</sub> on SOA formation. *Environ. Sci. Technol.* 56, 3915 –  
341 3924, <https://doi.org/10.1021/acs.est.1c06855>, 2022.

342 Mikuska, P., Motyka, K., and Vecera, Z.: Determination of nitrous acid in air using  
343 wet effluent diffusion denuder–FIA technique, *Talanta*; 77, 635 – 641,  
344 <https://doi.org/10.1016/j.talanta.2008.07.008>, 2008.

345 Rumsey, I. C., Cowen, K. A., Walker, J. T., Kelly, T. J., Hanft, E. A., Mishoe, K.,  
346 Rogers, C., Proost, R., Beachley, G. M., Lear, G., Frelink, T., and Otjes, R. P.: An  
347 assessment of the performance of the Monitor for aerosols and gases in ambient  
348 air (MARGA): a semi-continuous method for soluble compounds. *Atmos. Chem.*  
349 *and Phys.* 14, 5639 – 5658, <https://doi.org/10.5194/acp-14-5639-2014>, 2014.

350 Saraswati, Sharma, S. K., Saxena, M., and Mandal, T. K.: Characteristics of gaseous  
351 and particulate ammonia and their role in the formation of secondary inorganic  
352 particulate matter at Delhi, India, *Atmos. Res.* 218, 34 – 49,  
353 <https://doi.org/10.1016/j.atmosres.2018.11.010>, 2019.

354 Seinfeld, J. H., Pandis, S. N., and Noone, K. J.: Atmospheric chemistry and physics:  
355 from air pollution to climate change. *Phys. Today* 51, 88 – 90,  
356 <https://doi.org/10.1063/1.882420>, 1998.

---

357 Shi, G., Xu, J., Peng, X., Xiao, Z., Chen, K., Tian, Y., Guan, X., Feng, Y., Yu, H.,  
358 Nenes, A., and Russell, A. G.: pH of pH of aerosols in a polluted atmosphere:  
359 source contributions to highly acidic aerosol. *Environ. Sci. Technol.* 51, 4289 –  
360 4296, <https://doi.org/10.1021/acs.est.6b05736>, 2017.

361 Shi, G., Xu, J., Shi, X., Liu, B., Bi, X., Xiao, Z., Chen, K., Wen, J., Dong, S., Tian, Y.,  
362 Feng, Y., Yu, H., Song, S., Zhao, Q., Gao, J., and Russell, A. G.: Aerosol pH  
363 dynamics during haze periods in an urban environment in China: use of detailed,  
364 hourly, speciated observations to study the role of ammonia availability and  
365 secondary aerosol formation and urban environment. *J. Geophys. Res. Atmos.*  
366 124, 9730 – 9742, <https://doi.org/10.1029/2018jd029976>, 2019.

367 Song, S., Gao, M., Xu, W., Shao, J., Shi, G., Wang, S., Wang, Y., Sun, Y., and  
368 McElroy, M. B.: Fine-particle pH for Beijing winter haze as inferred from  
369 different thermodynamic equilibrium models, *Atmos. Chem. and Phys.* 18, 7423  
370 – 7438, <https://doi.org/10.5194/acp-18-7423-2018>, 2018.

371 Takeuchi M, M. Y., Tsunoda H, Tanaka H.: Atmospheric acid gases in tokushima,  
372 Japan, monitored with parallel plate wet denuder coupled ion chromatograph.  
373 *Anal. Sci.* 29, 165 – 168, <https://doi.org/10.2116/analsci.29.165>, 2013.

374 Trebs, I., B. B., C. A., U. Rummel, M. Blumthaler, R. K. O., F. X. M., S. F., a., and  
375 Andreae., M. O.: Relationship between the NO<sub>2</sub> photolysis frequency and the  
376 solar. *Atmos. Meas. Tech.* 2, 725 – 739, <https://doi.org/10.5194/amt-2-725-2009>,  
377 2009.

378 VandenBoer, T. C., Markovic, M. Z., Sanders, J. E., Ren, X., Pusede, S. E., Browne, E.  
379 C., Cohen, R. C., Zhang, L., Thomas, J., Brune, W. H., and Murphy, J. G.:  
380 Evidence for a nitrous acid (HONO) reservoir at the ground surface in  
381 Bakersfield, CA, during CalNex 2010. *J. Geophys. Res. Atmos.* 119, 9093 –  
382 9106, <https://doi.org/10.1002/2013jd020971>, 2014.

383 Wang, G., Zhang, R., Gomez, M. E., Yang, L., Levy Zamora, M., Hu, M., Lin, Y.,  
384 Peng, J., Guo, S., Meng, J., Li, J., Cheng, C., Hu, T., Ren, Y., Wang, Y., Gao, J.,

---

385 Cao, J., An, Z., Zhou, W., Li, G., Wang, J., Tian, P., Marrero-Ortiz, W., Secret, J.,  
386 Du, Z., Zheng, J., Shang, D., Zeng, L., Shao, M., Wang, W., Huang, Y., Wang, Y.,  
387 Zhu, Y., Li, Y., Hu, J., Pan, B., Cai, L., Cheng, Y., Ji, Y., Zhang, F., Rosenfeld, D.,  
388 Liss, P. S., Duce, R. A., Kolb, C. E., and Molina, M. J.: Persistent sulfate  
389 formation from London Fog to Chinese haze. *Proc. Natl. Acad. of Sci. U. S. A.*  
390 113, 13630 – 13635, <https://doi.org/10.1073/pnas.1616540113>, 2016a.

391 Wang, H., Ding, J., Xu, J., Wen, J., Han, J., Wang, K., Shi, G., Feng, Y., Ivey, C. E.,  
392 Wang, Y., Nenes, A., Zhao, Q., and Russell, A. G.: Aerosols in an arid  
393 environment: the role of aerosol water content, particulate acidity, precursors,  
394 and relative humidity on secondary inorganic aerosols. *Sci. Total Environ.* 646,  
395 564 – 572, <https://doi.org/10.1016/j.scitotenv.2018.07.321>, 2019.

396 Wang, R., Ye, X., Liu, Y., Li, H., Yang, X., Chen, J., Gao, W., and Yin, Z.:  
397 Characteristics of atmospheric ammonia and its relationship with vehicle  
398 emissions in a megacity in China, *Atmos. Environ.* 182, 97 – 104,  
399 <https://doi.org/10.1016/j.atmosenv.2018.03.047>, 2018.

400 Wang, S., Wang, L., Li, Y., Wang, C., Wang, W., Yin, S., and Zhang, R.: Effect of  
401 ammonia on fine-particle pH in agricultural regions of China: comparison  
402 between urban and rural sites, *Atmos. Chem. Phys.* 20, 2719 – 2734,  
403 <https://doi.org/10.5194/acp-20-2719-2020>, 2020.

404 Wang, S., Fan, X., Xu, Y., Zhang, R., and Ren, B.: Insight into the non-linear  
405 responses of particulate sulfate to reduced SO<sub>2</sub> concentration: A perspective from  
406 the aqueous-phase reactions in a megacity in Northern China, *Atmos. Res.*, 290,  
407 <https://doi.org/10.1016/j.atmosres.2023.106796>, 2023.

408 Wang, W., Wang, S., Xu, J., Zhou, R., Shi, C., and Zhou, B.: Gas-phase ammonia and  
409 PM<sub>2.5</sub> ammonium in a busy traffic area of Nanjing, China, *Environ. Sci. Pollut.*  
410 *Res. Int.*, 23, 1691 – 1702, <https://doi.org/10.1007/s11356-015-5397-3>, 2016b.

411 Wang, X., Yin, S., Zhang, R., Yuan, M., and Ying, Q.: Assessment of summertime O<sub>3</sub>  
412 formation and the O<sub>3</sub>-NO<sub>x</sub>-VOC sensitivity in Zhengzhou, China using an

---

413 observation-based model. *Sci. Total Environ.* 813, 152449,  
414 <https://doi.org/10.1016/j.scitotenv.2021.152449>, 2022.

415 Wang, Y., Zhu, S., Ma, J., Shen, J., Wang, P., Wang, P., and Zhang, H.: Enhanced  
416 atmospheric oxidation capacity and associated ozone increases during  
417 COVID-19 lockdown in the Yangtze River Delta, *Sci. Total Environ.*, 768,  
418 144796, <https://doi.org/10.1016/j.scitotenv.2020.144796>, 2021.

419 Wu, S., Zhang, Y., Schwab, J., Li, Y., Liu, Y., and Yuan, C.: High-resolution ammonia  
420 emissions inventories in Fujian, China, 2009–2015, *Atmos. Environ.*, 162, 100 –  
421 114, <https://doi.org/10.1016/j.atmosenv.2017.04.027>, 2017.

422 Xu, W., Kuang, Y., Zhao, C., Tao, J., Zhao, G., Bian, Y., Yang, W., Yu, Y., Shen, C.,  
423 Liang, L., Zhang, G., Lin, W., and Xu, X.: NH<sub>3</sub>-promoted hydrolysis of NO<sub>2</sub>  
424 induces explosive growth in HONO, *Atmos. Chem. Phys.* 19, 10557 – 10570,  
425 <https://doi.org/10.5194/acp-19-10557-2019>, 2019.

426 Xuan, H., Zhao, Y., Ma, Q., Chen, T., Liu, J., Wang, Y., Liu, C., Wang, Y., Liu, Y., Mu,  
427 Y., and He, H.: Formation mechanisms and atmospheric implications of  
428 summertime nitrous acid (HONO) during clean, ozone pollution and double  
429 high-level PM<sub>2.5</sub> and O<sub>3</sub> pollution periods in Beijing. *Sci. Total Environ.* 857:  
430 159538, <https://doi.org/10.1016/j.scitotenv.2022.159538>, 2023.

431 Zhao, Y., Zhang, N., Wei, Q., Han, Y., Mao, K., Cai, Y., Li, R.: Flow injection  
432 chemiluminescence method in analytical chemistry. *Spectrosc. Spectral. Analys.*  
433 30, 2512 – 2517, [https://doi.org/10.3964/j.issn.1000-0593\(2010\)09-2512-06](https://doi.org/10.3964/j.issn.1000-0593(2010)09-2512-06),  
434 2010.

435 Yu, Y., Cheng, P., Li, H., Yang, W., Han, B., Song, W., Hu, W., Wang, X., Yuan, B.,  
436 Shao, M., Huang, Z., Li, Z., Zheng, J., Wang, H., and Yu, X.: Budget of nitrous  
437 acid (HONO) at an urban site in the fall season of Guangzhou, China, *Atmos.*  
438 *Chem. Phys.* 22, 8951 – 8971, <https://doi.org/10.5194/acp-22-8951-2022>, 2022.

439 Zhang, W., Tong, S., Jia, C., Wang, L., Liu, B., Tang, G., Ji, D., Hu, B., Liu, Z., Li, W.,  
440 Wang, Z., Liu, Y., Wang, Y., and Ge, M.: Different HONO sources for three

---

441 layers at the urban area of Beijing. *Environ. Sci. Technol.* 54, 12870 – 12880,  
442 <https://doi.org/10.1021/acs.est.0c02146>, 2020a.

443 Zhang, Y., Liu, X., Fang, Y., Liu, D., Tang, A., and Collett, J. L.: Atmospheric  
444 ammonia in Beijing during the COVID-19 outbreak: concentrations, sources, and  
445 implications. *Environ. Sci. Technol. Lett.* 8, 32 – 38,  
446 <https://doi.org/10.1021/acs.estlett.0c00756>, 2020b.

447
