# Supplementary material for: Measurement Report: Elevated excess-NH 3 can promote the redox reaction to produce HONO: Insights from the COVID-19 pandemic
Source: Copernicus journal article supplement (doi:10.5194/egusphere-2023-2913), 2024-02-12
Supplement: Supplementary file [file egusphere-2023-2913-AC1-supplement.pdf]

No.: egusphere-2023-2913

**Title: Measurement Report: Elevated excess-NH<sub>3</sub> can promote the redox reaction to produce HONO: Insights from the COVID-19 pandemic**

## **Reviewer #2:**

### **General Comments:**

This study reported that there was a noticeable increase in NH<sub>3</sub> concentrations during the COVID-19 pandemic. In addition to the meteorological conditions, the significant decrease in sulfate and nitrate concentrations enhanced the partitioning of NH<sub>4</sub><sup>+</sup> to NH<sub>3</sub>, which enables enhanced particle pH values and in turn accelerate the redox reactions between NO<sub>2</sub> and SO<sub>2</sub> to form HONO. The article has several major issues and should be considered carefully.

Thank you for your careful reading of our paper and valuable comments and suggestions. We believe that we have adequately addressed your comments. To facilitate your review, we used green highlights for your comments, yellow highlights for Reviewer #1, and red color indicating our own corrections in the manuscript.

1. In the introduction, the author comments that the exact relationship between NO<sub>x</sub>, NH<sub>3</sub> and AOC remains unclear. However, it's a lengthy description of the changes in NH<sub>3</sub> and pH before and during the epidemic and there is no detailed discussion on the specific impact on AOC. In short, the research problems pointed out in the introduction have not been fully explored in the study, and many conclusions are very far-fetched.

**Response:** Thanks for your comment. In the original article, we indeed overly extended the perspectives of this study. In the revised manuscript, we removed all descriptions regarding AOC and focused on the sources of HONO, for example:

“Nitrous acid (HONO) is a critical precursor of hydroxyl radical (OH), contributing to more than 60% of OH production (Alicke, 2003; Platt et al., 1980; Kleffmann et al., 2005). The OH can react with carbon monoxide, nitrogen oxides (NO<sub>x</sub>), sulfur dioxide (SO<sub>2</sub>), and volatile organic compounds to produce secondary pollutants such as ozone (O<sub>3</sub>) and PM<sub>2.5</sub> (particulate matter with an aerodynamic diameter less than or equal to 2.5 μm), thereby affecting air quality, human health, and global climate change (Li et al., 2021a; Wang et al., 2023b; Lu et al., 2018).”

2. In lines 296-297, the paper argues that HONO has other sources and that the process of NO<sub>2</sub> reacting with SO<sub>2</sub> to generate HONO is currently insufficient evidence. In addition, this reaction is affected by pH, so how much does this contribution to HONO affect atmospheric oxidation? This discussion is also sorely lacking.

**Response:** Thanks for your comment. In recent years, an increasing number of laboratory and field observation studies have shown that the reaction of NO<sub>2</sub> and SO<sub>2</sub> can generate HONO, especially under high ammonia conditions (Ge et al., 20219; Li et al., 2018; Zhang et al., 2023, 2024). Accordingly, this study found that observed NH<sub>3</sub> concentrations increased during the epidemic control period, and calculated pH values showed an increase. In addition, the positive correlations between HONO with SO<sub>2</sub>, Excess-NH<sub>x</sub>, SO<sub>4</sub><sup>2-</sup>, and pH further indicate the existence of reaction of NO<sub>2</sub> and SO<sub>2</sub>.

Moreover, we calculated the reaction rate of NO<sub>2</sub> and SO<sub>2</sub> and found that it rose by more than 50%. Although the majority of HONO unknown sources remain unexplained, this partly explains the significant decrease in NO<sub>x</sub> during the epidemic period, but the relatively low decrease in HONO concentrations.

Ge, S., Wang, G., Zhang, S., Li, D., and Zhang, H.: Abundant NH<sub>3</sub> in China enhances atmospheric HONO production by promoting the heterogeneous reaction of SO<sub>2</sub> with NO<sub>2</sub>. *Environ. Sci. Technol.* 53, 14339 – 14347, <https://doi.org/10.1021/acs.est.9b04196>, 2019.

Li, L., Hoffmann, M. R., and Colussi, A. J.: Role of nitrogen dioxide in the production of sulfate during Chinese haze-aerosol episodes, *Environ. Sci. Technol.*, 52, 2686 – 2693, <https://doi.org/10.1021/acs.est.7b05222>, 2018.

Zhang, X., Tong, S., Jia, C., Zhang, W., Wang, Z., Tang, G., Hu, B., Liu, Z., Wang, L., Zhao, P., Pan, Y., and Ge, M.: Elucidating HONO formation mechanism and its essential contribution to OH during haze events., *npj. CIWim. Atmos. Sci.*, 6, 55, <https://doi.org/10.1038/s41612-023-00371-8>, 2023.

Zhang, P., Li, H., Ma, Q., Chen, T., Chu, B., Yu, Y., and He, H.: SO<sub>2</sub> photoaging enhances the surface conversion of NO<sub>2</sub>-to-HONO on elemental carbon, *Environ. Sci. Technol. Lett.*, 11, 143 – 149, <https://doi.org/10.1021/acs.estlett.3c00878>, 2024.

3. About HONO sources calculation, there are also many issues. The emission of motor vehicles at different stations varies greatly, so it is unreasonable to use 0.65% as the emission factor of HONO at all stations.

**Response:** Thanks for your comments.

Firstly, We determined whether it is necessary to calculate vehicle emissions, and a supplementary HONO emission factor table from vehicle emissions was added to support the selection of factors in the revised version:

HONO can be released directly into the atmosphere through vehicle exhaust (Burling et al., 2010; Veres et al., 2010). The lifetime of HONO in the atmosphere is relatively short, so vehicle emissions significantly contribute to urban atmospheric HONO (Chen et al., 2023; Liu et al., 2021a). Considering that there has been a significant reduction in vehicle emissions in urban areas during DC. Additionally, the R-PY site is far from roads. Thus, vehicle emissions may not be the primary source of HONO for the U-ZK site during DC and R-PY sites during entire periods. To further validate the above conclusions, the conditional bivariate probability function diagrams of NO<sub>2</sub> at U-ZK and R-PY sites during PC and DC are depicted in Figure S2. NO<sub>2</sub> predominantly originated from long-distance transport at the U-ZK site during DC and the R-PY site during both PC and DC. Consequently, vehicle emissions are only calculated for the U-ZK site during the PC.

Here we use the HONO/NO<sub>x</sub> ratio to estimate HONO concentration, which is generally considered to be the vehicle emission factor (Kramer et al., 2020; Hao et al., 2020; Yu et al., 2022) for HONO. The calculation formula is as follows:

$$[\text{HONO}_{\text{emi}}] = 0.8\% \times [\text{NO}_x] \quad (1)$$

where [HONO<sub>emi</sub>] and [NO<sub>x</sub>] represent the HONO concentration emitted by vehicles and the observed NO<sub>x</sub> concentration, respectively. Regarding previous studies (Table S3), 0.8% was selected as the vehicle emission factor, considering differences in vehicle type, fuel composition, and other factors (Kramer et al., 2020; Hao et al., 2020; Huang et al., 2017).”

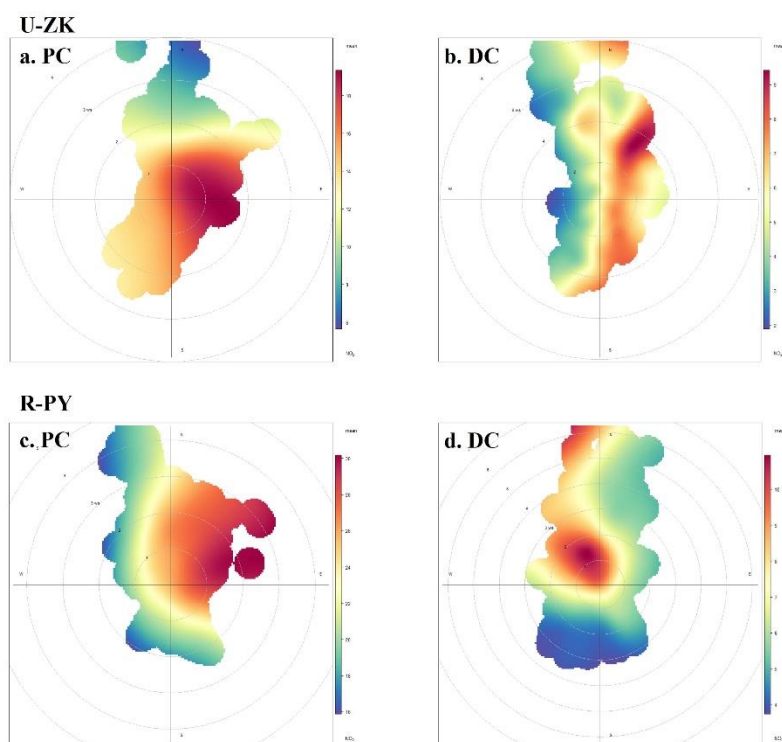

Figure S2. Result of conditional bivariate probability function plots: NO<sub>2</sub> at U-ZK and R-PY sites before (PC) and during (DC) the COVID-19 outbreak. The color scale bar represents NO<sub>2</sub> concentration.

Table S3. Summary of vehicle emission factors.

| Observation site | Period | Emission factor (%) | Reference                     |
|------------------|--------|---------------------|-------------------------------|
| Beijing          | 2020   | 0.79                | (Meng et al., 2020)           |
| Hong Kong        | 2015   | 0.4–1.8             | (Yun et al., 2017)            |
| Hong Kong        | 2011   | 0.5–1.6             | (Xu et al., 2015)             |
| Kiesberg Tunnel  | 2001   | 0.8                 | (Kleffmann et al., 2003)      |
| Kiesberg Tunnel  | 1997   | 0.3–0.8             | (Kurtenbach and Wiesen, 2001) |
| Guangzhou        | 2019   | 1.31                | (Li et al., 2021b)            |

Secondly, the sources of HONO were recalculated to better investigate the changes in HONO between PC and DC periods:

## Text S4 Sources of HONO

### 4.1 Direct emission

HONO can be released directly into the atmosphere through vehicle exhaust (Burling et al., 2010; Veres et al., 2010). The lifetime of HONO in the atmosphere is relatively short, so vehicle emissions significantly contribute to urban atmospheric HONO (Chen et al., 2023; Liu et al., 2021a). Considering that there has been a significant reduction in vehicle emissions in urban areas during DC. Additionally, the R-PY site is far from roads. Thus, vehicle emissions may not be the primary source of HONO for the U-ZK site during DC and R-PY sites during entire periods. To further validate the above conclusions, the conditional bivariate probability function diagrams of NO<sub>2</sub> at U-ZK and R-PY sites during PC and DC are depicted in Figure S2. NO<sub>2</sub> predominantly originated from long-distance transport at the U-ZK site during DC and the R-PY site during both PC and DC. Consequently, vehicle emissions are only calculated for the U-ZK site during the PC.

Here we use the HONO/NO<sub>x</sub> ratio to estimate HONO concentration, which is generally considered to be the vehicle emission factor (Kramer et al., 2020; Hao et al., 2020; Yu et al., 2022) for HONO. The calculation formula is as follows:

$$[\text{HONO}_{\text{emi}}] = 0.8\% \times [\text{NO}_x] \quad (1)$$

where [HONO<sub>emi</sub>] and [NO<sub>x</sub>] represent the HONO concentration emitted by vehicles and the observed NO<sub>x</sub> concentration, respectively. Regarding previous studies (Table S3), 0.8% was selected as the vehicle emission factor, considering differences in vehicle

type, fuel composition, and other factors (Kramer et al., 2020; Hao et al., 2020; Huang et al., 2017).

## 4.2 Homogeneous reaction of NO and •OH

The reaction between NO and •OH is the primary gas-phase reaction source of HONO at high NO concentrations, and the production rate contribution ( $P_{\text{OH+NO}}$ ) for this reaction can be calculated as:

$$P_{\text{OH+NO}} = k_{\text{OH+NO}}[\text{OH}][\text{NO}] \quad (2)$$

where  $k_{\text{OH+NO}}$  ( $7.2 \times 10^{-12} \text{ cm}^3 \text{ molecule}^{-1} \text{ s}^{-1}$ ) is the rate constant for the reactions at 298K (Li et al., 2012). •OH concentration was simulated according to the empirical model (Hu et al., 2022; Wang et al., 2025):

$$[\text{OH}] = 4.1 \times 10^9 \times \frac{J(\text{O}^1\text{D}) \times J(\text{NO}_2) \times (140 \times [\text{NO}_2] + 1) + [\text{HONO}] \times J(\text{HONO})}{0.41 \times [\text{NO}_2]^2 + 1.7 \times [\text{NO}_2] + 1 + [\text{NO}] \times k_{\text{NO+OH}} + [\text{HONO}] \times k_{\text{NO+OH}}} \quad (3)$$

where,  $J(\text{O}^1\text{D})$ ,  $J(\text{NO}_2)$ , and  $J(\text{HONO})$  are the photolysis rates calculated using the TUV model (v5.2; available at <http://cprm.acom.ucar.edu/Models/TUV/>). The cloud optical depth value for the TUV model was adjusted so that the predicted UVB radiation intensity matched the observations (Lyu et al., 2019; Wang et al., 2022b). The calculated •OH concentration varied from  $0.1 \times 10^6$  to  $4 \times 10^6$  molecule/cm<sup>3</sup> at U-ZK and  $0.1 \times 10^6$  to  $5 \times 10^6$  molecule/cm<sup>3</sup> at R-PY, which was comparable to the levels in other cities of North China (Li et al., 2018; Fuchs et al., 2017; Yang et al., 2017). Since there is no photolysis at night, the •OH concentration was assumed to be  $0.8 \times 10^6$  molecule/cm<sup>3</sup> (Wang et al., 2022).

### 4.3 Heterogeneous conversion of NO<sub>2</sub> to HONO

#### 4.3.1 Heterogeneous dark reactions

The heterogeneous conversion of NO<sub>2</sub> to HONO on the ground (P<sub>ground</sub>) and on the aerosol surface (P<sub>aerosol</sub>) was calculated based on parameters obtained from experiments or observations.

$$P_{\text{ground}} = \frac{1}{8} \gamma_1 \times [\text{NO}_2] \times C_{\text{NO}_2} \times \frac{S_g}{V} \quad (4)$$

$$P_{\text{aerosol}} = \frac{1}{4} \gamma_2 \times [\text{NO}_2] \times C_{\text{NO}_2} \times \frac{S_a}{V} \quad (5)$$

$$\frac{S_g}{V} = \frac{1}{\text{MLH}} \quad (6)$$

$$C_{\text{NO}_2} = \sqrt{\frac{8RT}{\pi M}} \quad (7)$$

where  $C_{\text{NO}_2}$  is the average molecular velocity of NO<sub>2</sub> molecule (m s<sup>-1</sup>); R is the ideal gas constant; T is the temperature (K); M is the molecular weight of NO<sub>2</sub> (kg mol<sup>-1</sup>); MLH is the height of the mixed layer, which is determined to be 50 m due to HONO formation on the ground level and its short lifetime (Liu et al., 2020b);  $S_a/V$  is the surface area to volume ratio of aerosol, estimated by Su et al. (Su et al., 2008).

#### 4.3.2 Heterogeneous photo-enhanced reactions

The heterogeneous photo-enhanced reactions of NO<sub>2</sub> on the surface of the ground (P<sub>ground+hv</sub>) and the surface of the aerosol (P<sub>aerosol+hv</sub>) were calculated following (Zhang et al., 2020a):



$$P_{\text{ground+hv}} = \frac{1}{8} \times C_{\text{NO}_2} \times \frac{1}{\text{MLH}} \times \gamma_1 \times \frac{J_{\text{NO}_2}}{J_{\text{NO}_2,\text{noon}}} \times [\text{NO}_2] \quad (8)$$

$$P_{\text{aerosol+hv}} = \frac{1}{4} \times C_{\text{NO}_2} \times \frac{S_a}{V} \times \gamma_2 \times \frac{J_{\text{NO}_2}}{J_{\text{NO}_2,\text{noon}}} \times [\text{NO}_2] \quad (9)$$

where  $J_{\text{NO}_2}$  and  $J_{\text{NO}_2,\text{noon}}$  are the photolysis rate of  $\text{NO}_2$  and the photolysis rate of  $\text{NO}_2$  at noon during the day, respectively.

$\gamma_1$  and  $\gamma_2$  are the absorption coefficient of  $\text{NO}_2$  on the ground and aerosol surface, respectively, which is assumed to be  $4 \times 10^{-6}$  (Yu et al., 2022; Zhang et al., 2021; Zhang et al., 2020a). Moreover, we discuss the uncertainties based on the recommended values of  $2 \times 10^{-6}$ – $1 \times 10^{-5}$  as upper and lower bounds (Chen et al., 2023; VandenBoer et al., 2013; Wong et al., 2011). Results show (Figure S3) that the uncertainties for  $P_{\text{ground}}$ ,  $P_{\text{aerosol}}$ ,  $P_{\text{ground+hv}}$ , and  $P_{\text{aerosol+hv}}$  are  $-50\%$  to  $150\%$ ,  $-50\%$  to  $151\%$ ,  $-20\%$  to  $120\%$ , and  $-50\%$  to  $121\%$  at the U-ZK, respectively. At the R-PY, the uncertainties for  $P_{\text{ground}}$ ,  $P_{\text{aerosol}}$ ,  $P_{\text{ground+hv}}$ , and  $P_{\text{aerosol+hv}}$  are  $-50\%$  to  $150\%$ ,  $-50\%$  to  $151\%$ ,  $-20\%$  to  $120\%$ , and  $-50\%$  to  $121\%$ , respectively.

#### 4.4 Nitrate photolysis

The nitrate photolysis ( $P_{\text{nitrate}}$ ) was calculated based on the measured nitrate concentration ( $\text{NO}_3^-$ ) from  $\text{PM}_{2.5}$  and nitrate photolysis rate ( $J_{\text{nitrate} \rightarrow \text{HONO}}$ ):

$$P_{\text{nitrate}} = J_{\text{nitrate} \rightarrow \text{HONO}} \times [\text{NO}_3^-] \quad (10)$$

where the  $J_{\text{nitrate} \rightarrow \text{HONO}}$  was simulated by normalizing UV values, when the Zenit Angle is  $0^\circ$ ,  $J_{\text{nitrate} \rightarrow \text{HONO}}$  varied within the range of  $1.22 \times 10^{-5}$  to  $4.84 \times 10^{-4} \text{ s}^{-1}$ , with an average value of  $8.24 \times 10^{-5} \text{ s}^{-1}$  (Bao et al., 2018).”

Unfortunately, for MLH,  $S_a/V$ , and the relationship between  $k_1$  and temperature, as there were no observational data or scientifically established estimation methods, this study did not consider their variations. This omission may lead to differences in conclusions and warrants further investigation in future research.

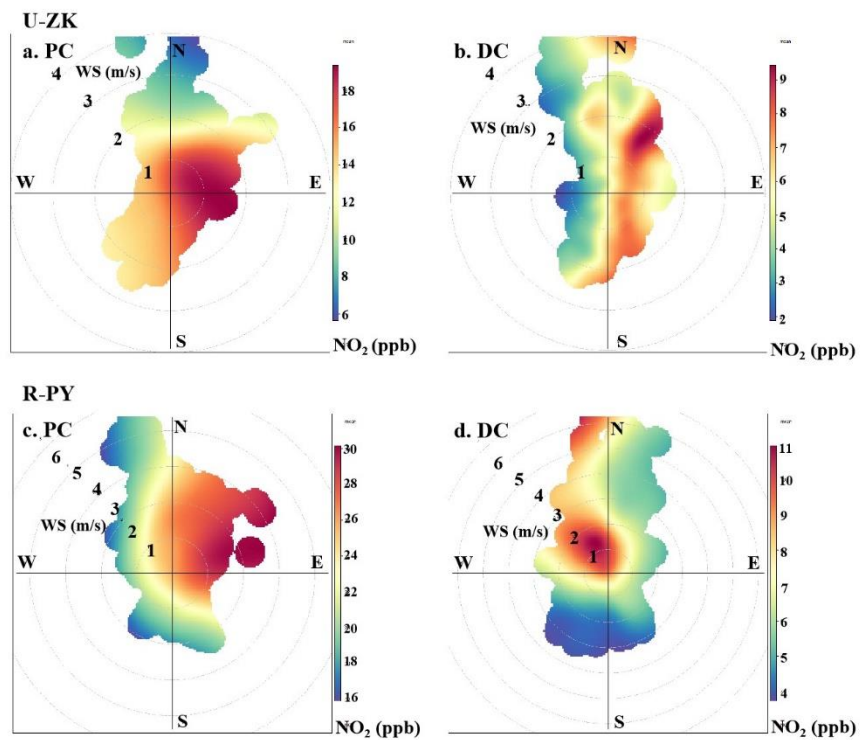

Figure S2. Result of conditional bivariate probability function plots: NO<sub>2</sub> at U-ZK and R-PY sites before (PC) and during (DC) the COVID-19 outbreak. The color scale bar represents NO<sub>2</sub> concentration.

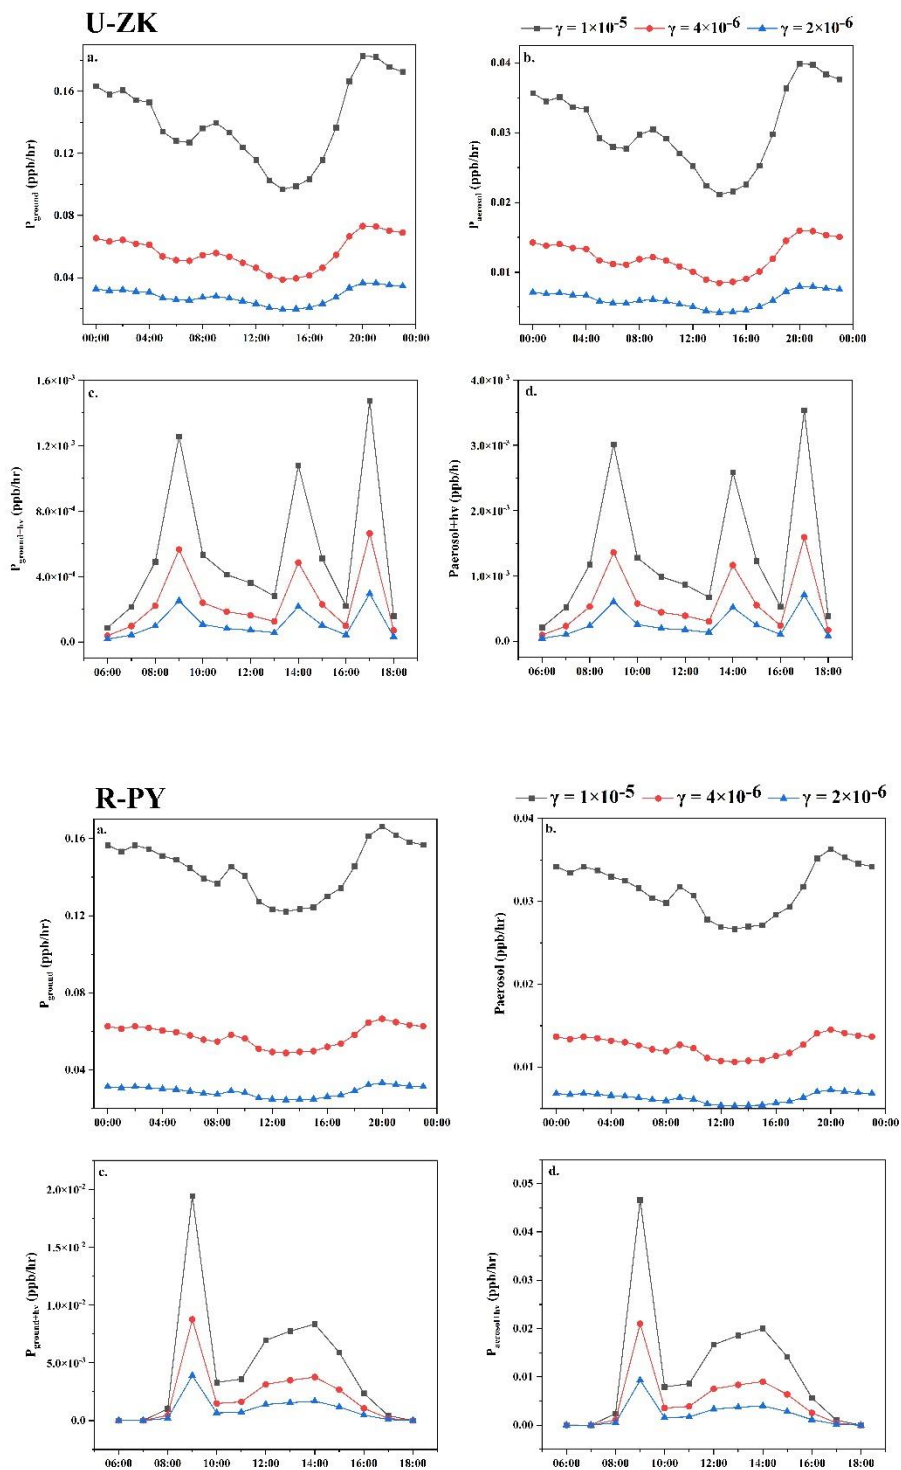

Figure S3. HONO production rate using different uptake rates of  $\text{NO}_2$  at the U-ZK and R-PY sites before (PC) and during (DC) the COVID-19 outbreak. (a)  $P_{\text{ground}}$ , (b)  $P_{\text{aerosol}}$ , (c)  $P_{\text{ground+hv}}$ , and (d)  $P_{\text{aerosol+hv}}$

Table S3. Summary of vehicle emission factors.

| Observation site | Period | Emission factor (%) | Reference                     |
|------------------|--------|---------------------|-------------------------------|
| Beijing          | 2020   | 0.79                | (Meng et al., 2020)           |
| Hong Kong        | 2015   | 0.4–1.8             | (Yun et al., 2017)            |
| Hong Kong        | 2011   | 0.5–1.6             | (Xu et al., 2015)             |
| Kiesberg Tunnel  | 2001   | 0.8                 | (Kleffmann et al., 2003)      |
| Kiesberg Tunnel  | 1997   | 0.3–0.8             | (Kurtenbach and Wiesen, 2001) |
| Guangzhou        | 2019   | 1.31                | (Li et al., 2021b)            |

4. The uptake coefficient of NO<sub>2</sub> on surfaces is not mentioned.

**Response:** Thank you for your comment. We have added the description of the uptake coefficient of NO<sub>2</sub>:

“ $\gamma_1$  and  $\gamma_2$  are the absorption coefficient of NO<sub>2</sub> on the ground and aerosol surface, respectively, which is assumed to be  $4 \times 10^{-6}$  (Yu et al., 2022; Zhang et al., 2021; Zhang et al., 2020a). Moreover, we discuss the uncertainties based on the recommended values of  $2 \times 10^{-6}$ – $1 \times 10^{-5}$  as upper and lower bounds (Chen et al., 2023; VandenBoer et al., 2013; Wong et al., 2011). Results show (Figure S3) that the uncertainties for  $P_{\text{ground}}$ ,  $P_{\text{aerosol}}$ ,  $P_{\text{ground+hv}}$ , and  $P_{\text{aerosol+hv}}$  are –50% to 150%, –50% to 151%, –20% to 120%, and –50% to 121% at the U-ZK, respectively. At the R-PY, the uncertainties for  $P_{\text{ground}}$ ,  $P_{\text{aerosol}}$ ,  $P_{\text{ground+hv}}$ , and  $P_{\text{aerosol+hv}}$  are –50% to 150%, –50% to 151%, –20% to 120%, and –50% to 121%, respectively.”



Figure S3. HONO production rate using different uptake rates of  $\text{NO}_2$  at the U-ZK and R-PY sites before (PC) and during (DC) the COVID-19 outbreak. (a)  $P_{\text{ground}}$ , (b)  $P_{\text{aerosol}}$ , (c)  $P_{\text{ground+hv}}$ , and (d)  $P_{\text{aerosol+hv}}$

5. The same OH concentration used at all station is also controversial.

**Response:** Thank you for your comments. We have modified the method for determining •OH concentration in the revised manuscript:

•OH concentration was simulated according to the empirical model (Hu et al., 2022;

Wang et al., 2025):

$$[\text{OH}] = 4.1 \times 10^9 \times \frac{J(\text{O}^1\text{D}) \times J(\text{NO}_2) \times (140 \times [\text{NO}_2] + 1) + [\text{HONO}] \times J(\text{HONO})}{0.41 \times [\text{NO}_2]^2 + 1.7 \times [\text{NO}_2] + 1 + [\text{NO}] \times k_{\text{NO}+\text{OH}} + [\text{HONO}] \times k_{\text{NO}+\text{OH}}} \quad (3)$$

where,  $J(\text{O}^1\text{D})$ ,  $J(\text{NO}_2)$ , and  $J(\text{HONO})$  are the photolysis rates calculated using the TUV model (v5.2; available at <http://cprm.acom.ucar.edu/Models/TUV/>). The cloud optical depth value for the TUV model was adjusted so that the predicted UVB radiation intensity matched the observations (Lyu et al., 2019; Wang et al., 2022b). The calculated •OH concentration varied from  $0.1 \times 10^6$  to  $4 \times 10^6$  molecule/cm<sup>3</sup> at U-ZK and  $0.1 \times 10^6$  to  $5 \times 10^6$  molecule/cm<sup>3</sup> at R-PY, which was comparable to the levels in other cities of North China (Li et al., 2018; Fuchs et al., 2017; Yang et al., 2017). Since there is no photolysis at night, the •OH concentration was assumed to be  $0.8 \times 10^6$  molecule/cm<sup>3</sup> (Wang et al., 2022).

6. In the supplement, is the equation (4) utilized in the calculation?

**Response:** Sorry for the mistake. We have corrected the formula:

$$P_{\text{ground}} = \frac{1}{8} \gamma_1 \times [\text{NO}_2] \times C_{\text{NO}_2} \times \frac{S_g}{V} \quad (4)$$

$$P_{\text{aerosol}} = \frac{1}{4} \gamma_2 \times [\text{NO}_2] \times C_{\text{NO}_2} \times \frac{S_a}{V} \quad (5)$$

$$\frac{S_{\text{ref}}}{V} = \frac{1}{MLH} \quad (6)$$

7. The  $J_{\text{HONO}}$  and  $J_{\text{nitrate}}$  used are suggested to be described in detail.

**Response:** Thanks for your suggestion. We have added a detailed description:

“ $J(\text{O}^1\text{D})$ ,  $J(\text{NO}_2)$ , and  $J(\text{HONO})$  are the photolysis rates calculated using the TUV model (v5.2; available at <http://cprm.acom.ucar.edu/Models/TUV/>). The cloud optical depth value for the TUV model was adjusted so that the predicted UVB radiation intensity matched the observations (Lyu et al., 2019; Wang et al., 2022b).”

“The  $J_{\text{nitrate} \rightarrow \text{HONO}}$  was simulated by normalizing UV values when the Zenit Angle is  $0^\circ$ ,  $J_{\text{nitrate} \rightarrow \text{HONO}}$  varied within the range of  $1.22 \times 10^{-5}$  to  $4.84 \times 10^{-4} \text{ s}^{-1}$ , with an average value of  $8.24 \times 10^{-5} \text{ s}^{-1}$  (Bao et al., 2018).”

1 **Manuscript**

2 **Measurement Report: Elevated excess-NH<sub>3</sub> can**  
3 **promote the redox reaction to produce HONO:**  
4 **Insights from the COVID-19 pandemic**

5 Xinyuan Zhang<sup>1,2</sup>, Lingling Wang<sup>3</sup>, Nan Wang<sup>3</sup>, Shuangliang Ma<sup>3</sup>, Shenbo  
6 Wang<sup>2,4</sup>\*, Ruiqin Zhang<sup>2,4\*\*</sup>, Dong Zhang<sup>1,2</sup>, Mingkai Wang<sup>2,4</sup>, Hongyu  
7 Zhang<sup>1,2</sup>.

8  
9 <sup>1</sup> College of Chemistry, Zhengzhou University, Zhengzhou, 450000, China

10 <sup>2</sup> Research Institute of Environmental Sciences, Zhengzhou University, Zhengzhou  
11 450000, China

12 <sup>3</sup> Henan Provincial Ecological Environment Monitoring and Safety Center, Zhengzhou,  
13 450000, China

14 <sup>4</sup> School of Ecology and Environment, Zhengzhou University, Zhengzhou, 450000,  
15 China

16

17 **Correspondence:** Shenbo Wang (shbwang@zzu.edu.cn) and Ruiqin Zhang  
18 (rqzhang@zzu.edu.cn)

19



20 **Abstract**

21 **HONO plays a crucial role as a precursor to OH radicals in the tropospheric atmosphere.**

22 **The incongruity between HONO concentration and NO<sub>x</sub> emissions during the COVID-**

23 **19 pandemic remains puzzling.** Here, we show evidence from field observations of ten

24 sites in China that there was a noticeable increase in NH<sub>3</sub> concentrations during the

25 COVID-19 pandemic. In addition to the meteorological conditions, the significant

26 decrease in sulfate and nitrate concentrations enhanced the portioning of NH<sub>4</sub><sup>+</sup> to NH<sub>3</sub>.

27 Such conditions enable enhanced particle pH values, which in turn accelerate the redox

28 reactions between NO<sub>2</sub> and SO<sub>2</sub> to form HONO. This mechanism partly explains the

29 lower reduction of HONO concentration than that of NO<sub>2</sub> concentration during the

30 pandemic and highlights the importance of coordinating the control of SO<sub>2</sub>, NO<sub>x</sub>, and

31 NH<sub>3</sub> emissions.

32 **Keywords:** Ammonia, HONO, Gas-particle portioning, Acidity, COVID-19 pandemic

33

## 1. Introduction

Nitrous acid (HONO) is a critical precursor of hydroxyl radical (OH), contributing to more than 60% of OH production (Alicke, 2003; Platt et al., 1980; Kleffmann et al., 2005). The OH can react with carbon monoxide, nitrogen oxides (NO<sub>x</sub>), sulfur dioxide (SO<sub>2</sub>), and volatile organic compounds to produce secondary pollutants such as ozone (O<sub>3</sub>) and PM<sub>2.5</sub> (particulate matter with an aerodynamic diameter less than or equal to 2.5 μm), thereby affecting air quality, human health, and global climate change (Li et al., 2021a; Wang et al., 2023b; Lu et al., 2018)

High concentrations of HONO are present in urban daytime atmospheres, and exploring its sources has become a hot and challenging topic in the field of atmospheric chemistry (Jiang et al., 2022; Xu et al., 2019). Various sources of atmospheric HONO have been identified, including combustion processes (e.g., vehicle emissions) (Kramer et al., 2020; Liao et al., 2021; Li et al., 2021b), direct emissions from soil (Su and Zhang, 2011; Oswald et al., 2013; Meusel et al., 2018), homogeneous reactions between NO and OH radicals (Pagsberg et al., 1997; Atkinson et al., 2004), heterogeneous reactions of NO<sub>2</sub> on aerosols and ground surfaces (Zhang et al., 2020a; McFall et al., 2018; Liu et al., 2014, 2020a), and photolysis of nitrate (Spataro and Ianniello, 2014; Scharko et al., 2014; Romer et al., 2018; Ye et al., 2017; Shi et al., 2021). During the pandemic control periods, there was a substantial reduction in vehicle traffic flow and industrial emissions, leading to a decrease of more than 60% in NO<sub>x</sub> emissions in eastern China (Huang et al., 2021a). It was initially expected that the concentration of HONO would also decrease proportionally. However, Liu et al. (2020b) observed that the decrease in

56 HONO concentration during the pandemic period was only 31%, which was  
57 significantly lower than the reductions in NO (62%) and NO<sub>2</sub> (36%). Furthermore, the  
58 observed concentrations of HONO during the COVID-19 pandemic in 2020 were  
59 higher than those during the corresponding period in 2021 in Beijing (Luo et al., 2023).  
60 These findings suggest the existence of a considerable unknown source of HONO  
61 during the COVID-19 pandemic period.

62 Ammonia (NH<sub>3</sub>) is a primary alkaline gas in the atmosphere, capable of influencing  
63 the pH level of particulate matter and plays a crucial role in the atmospheric nitrogen  
64 cycle (Gu et al., 2022; Xu et al., 2020; Gong et al., 2011). Several studies have indicated  
65 that NH<sub>3</sub> can promote the formation of HONO by promoting the hydrolysis of NO<sub>2</sub> (Xu  
66 et al., 2019) or the redox reaction of NO<sub>2</sub> with SO<sub>2</sub> (Liu et al., 2023). Moreover,  
67 previous studies have reported that NH<sub>3</sub> concentrations in the atmosphere, particularly  
68 in rural areas, significantly increased during the pandemic (Xu et al., 2022; Cui, 2023;  
69 Zhang et al., 2020b). Consequently, the rise in NH<sub>3</sub> may contribute to the enhanced  
70 formation of HONO (Huang et al., 2021a). Unfortunately, there is currently a lack of  
71 research on the relationship between enhanced NH<sub>3</sub> and HONO during the COVID-19  
72 pandemic period.

73 To address this, online observational data on the chemical composition of PM<sub>2.5</sub>,  
74 gaseous pollutants, and meteorological conditions at ten sites in China before and  
75 during the COVID-19 pandemic period were analyzed to investigate the variation in  
76 NH<sub>3</sub> concentrations and particle pH, and explore the promoting effect of increased pH  
77 values on HONO formation.

## 78 **2. Materials and methods**

### 79 **2.1 Observation sites**

80 Online measurements were conducted at four urban and six rural sites in Henan  
81 Province, China from January 1 to February 29, 2020, including Sanmenxia (U-SMX),  
82 Zhoukou (U-ZK), Zhumadian (U-ZMD), and Xinyang (U-XY), as well as rural  
83 locations including Anyang (R-AY), Xinxiang (R-XX), Jiaozuo (R-JZ), Shangqiu (R-  
84 SQ), Nanyang (R-NY), and Puyang (R-PY). Descriptions and the spatial distribution  
85 of these ten sites can be found in Table S1 and Fig. S1.

### 86 **2.2 Measurements**

87 The aerosol and gas monitor (MARGA, Metrohm, Switzerland) was used to analyze  
88 the hourly water-soluble ions ( $\text{Na}^+$ ,  $\text{NH}_4^+$ ,  $\text{K}^+$ ,  $\text{Mg}^{2+}$ ,  $\text{Ca}^{2+}$ ,  $\text{Cl}^-$ ,  $\text{NO}_3^-$ , and  $\text{SO}_4^{2-}$ ) in  $\text{PM}_{2.5}$ ,  
89 as well as gaseous species ( $\text{NH}_3$ ,  $\text{HNO}_3$ ,  $\text{HCl}$ , and  $\text{HONO}$ ) at ten sampling sites. The  
90 MARGA instrument is widely used (Chen et al., 2017; Stieger et al., 2019; Twigg et al.,  
91 2022). A detailed description of the instrument and QA/QC can be found in Text S1. In  
92 brief, the atmospheric sample passes through a  $\text{PM}_{2.5}$  cut-off head, and both particles  
93 and gases enter a wet rotating dissolution device for diffusion. Subsequently, the  
94 particles in the sample undergo hygroscopic growth and condensation in an aerosol  
95 supersaturated vapor generator, followed by collection and ion chromatographic  
96 analysis. The gases in the sample are oxidized by  $\text{H}_2\text{O}_2$  in the dissolution device,  
97 absorbed into a liquid solvent, and then entered the gas sample collection chamber for

98 ion chromatographic quantification. The range of minimum detection limits for water-  
99 soluble ions was between 0.002  $\mu\text{g}/\text{m}^3$  ( $\text{Cl}^-$ ) to 0.081  $\mu\text{g}/\text{m}^3$  ( $\text{NH}_4^+$ ). Uncertainties of 20%  
100 are assumed for the detection of  $\text{NH}_3$  and  $\text{NH}_4^+$ , while uncertainties of 10% are assumed  
101 for other components (Wang et al., 2020, 2022a). **In addition, a detailed description of**  
102 **HONO measurement using this system can be found in Text S2.** Overall, the limit of  
103 detection for HONO was 4 pptv and the uncertainty was estimated to be  $\pm 20\%$ .

104 The data for  $\text{NO}_2$  and  $\text{SO}_2$  were obtained from a series of instruments provided by  
105 Thermo Fisher Scientific (USA). The hourly concentrations of organic carbon (OC) in  
106  $\text{PM}_{2.5}$  were analyzed using a carbon analyzer (Model 4, Sunset Laboratory., USA).  
107 Detailed descriptions of the  $\text{NO}_2$ ,  $\text{SO}_2$ , and carbon analyzers can be found in Text S3.  
108 The smart weather stations (LUFFTWS500, Sutron, Germany) were utilized for  
109 synchronized observation of meteorological parameters including pressure,  
110 temperature (T), and relative humidity (RH).

## 111 **2.3 Data analysis.**

### 112 **2.3.1 pH prediction.**

113 The thermodynamic model ISORROPIA-II was used to estimate the pH value of the  
114 particles (Fountoukis, 2007) by inputting RH, T,  $\text{K}^+$ ,  $\text{Ca}^{2+}$ ,  $\text{Mg}^{2+}$ , total ammonia  
115 ( $\text{TNH}_x = 17 \times (\frac{[\text{NH}_4^+]}{18} + \frac{[\text{NH}_3]}{17})$ ), total sulfuric acid ( $\text{TH}_2\text{SO}_4$ ,  $\text{SO}_4^{2-}$ ), total sodium  
116 ( $\text{TNa}$ ,  $\text{Na}^+$ ), total chlorine ( $\text{TCl}$ ,  $\text{Cl}^-$ ), and total nitrate ( $\text{TNO}_3 = \text{NO}_3^- + \text{HNO}_3$ ). The  
117 model has two calculation modes: the forward mode and reverse mode, and the aerosol

118 dissolution systems can be set to simulate a metastable state (aqueous phase) or stable  
 119 state (aqueous and solid phase). Studies have shown that the forward mode is less  
 120 affected by instrument measurement errors than the reverse mode (Ding et al., 2019;  
 121 Song et al., 2018). Additionally, the minimum average RH of about 55% was recorded  
 122 during the sampling period at the ten sites. Thus, ISORROPIA-II was run in the forward  
 123 model for the aerosol system in the metastable condition and only used data with RH  $\geq$   
 124 30% for simulation accuracy (Ding et al., 2019; Song et al., 2018). The ISORROPIA  
 125 model calculated the particle hydrate ion concentration per volume of air ( $H_{\text{air}}^+$ ) and  
 126 aerosol water associated with inorganic matter ( $AWC_{\text{inorg}}$ ). The pH value was calculated  
 127 using the following equation (Bougiatioti et al., 2016):

$$128 \quad \text{pH} = -\log_{10} H_{\text{aq}}^+ = -\log_{10} \frac{1000H_{\text{air}}^+}{AWC_{\text{inorg}} + AWC_{\text{org}}} \quad (2.1)$$

129 where the modeled concentrations for  $AWC_{\text{inorg}}$  and  $H_{\text{air}}^+$  are  $\mu\text{g}/\text{m}^3$ , and  $AWC_{\text{org}}$  is the  
 130 particle water associated with the organic matters predicted using the following method:

$$131 \quad AWC_{\text{org}} = \frac{m_s}{\rho_s} \frac{k_{\text{org}}}{\left(\frac{1}{\text{RH}} - 1\right)} \quad (2.2)$$

132 where  $m_s$  is the mass concentration of organic matter ( $\text{OM} = \text{OC} \times f$ ). The  $f$  is the  
 133 conversion factor of OC, which is dependent on the extent of OM oxidation and  
 134 secondary organic aerosol formation (Chow et al., 2015). Studies on the ratio of  
 135 OM/OC in fourteen cities in China suggested that the mean value of  $f$  was  $1.59 \pm 0.18$   
 136 during the winter season in Northern China (Xing et al., 2013), and thus we adopted 1.6  
 137 as the  $f$  in this study.  $k_{\text{org}}$  is the organic hygroscopicity parameter and depends on organic  
 138 functionality, water solubility, molecular weight, and oxidation level. Han et al. (2022)

139 have reported that the  $k_{org}$  generally increased with O: C ratios, with a range of 0–0.3  
140 for 23 organics, including carboxylic acids, amino acids, sugars, and alcohols. Gunthe  
141 et al, (2011) estimated a  $k_{org} = 0.06 \pm 0.01$  for the effective average hygroscopicity of  
142 the non-refractory organic particulate matter in the aerosols in Beijing. Our previous  
143 study has estimated that the uncertainties of  $k_{org}$  value (0.06) for pH in the range of 0–  
144 0.3 only lead to –1–3% errors, which can be neglected (Wang et al., 2023a). Therefore,  
145 the value of 0.06 was selected in this paper.  $\rho_s$  is the organic density, which was chosen  
146 to be 1.35 g/cm<sup>3</sup> following previous studies (Table S2).

### 147 2.3.2 The sources of HONO

148 The sources of HONO include direct emission ( $P_{emi}$ ), the homogeneous reaction of  
149 NO and •OH ( $P_{OH+NO}$ ), the heterogeneous reaction of NO<sub>2</sub> on the ground ( $P_{ground}$ ) and  
150 aerosol ( $P_{aerosol}$ ), the photo-enhanced heterogeneous reaction of NO<sub>2</sub> on the ground  
151 ( $P_{ground+hv}$ ) and aerosol ( $P_{aerosol+hv}$ ), and nitrate photolysis ( $P_{nitrate}$ ). The detailed  
152 calculation method is described in the Supplementary Material (Text S4, Table S3, Figs.  
153 S2 and S3)

### 154 2.3.3 Redox reaction of NO<sub>2</sub> with SO<sub>2</sub>.

155 The redox reaction of NO<sub>2</sub> with SO<sub>2</sub> (R<sub>1</sub>) is considered a crucial potential source of  
156 high concentrations of HONO in Northern China (Cheng et al., 2019; Wang et al.,  
157 2016b):

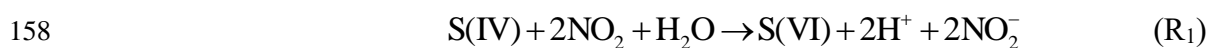

159 the rate expression for reaction (R<sub>1</sub>) was estimated to:

$$160 \quad d[S(VI)] / dt = k_1[NO_2][S(VI)], \quad (2.3)$$

161 the rate constant  $k_1$  value is pH dependent, e.g., for pH, 5,  $k_1 = (1.4 \times 10^5 + 1.24 \times 10^7)/2$   
162  $M^{-1} s^{-1}$ . For  $k_1$  values under other pH conditions and other related information, please  
163 refer to Text S5, Table S4, and Table S5.

### 164 **3. Results and discussion**

#### 165 **3.1 Variations of NH<sub>3</sub>, NH<sub>4</sub><sup>+</sup> and TNH<sub>x</sub>.**

166 The temporal variations of NH<sub>3</sub>, NH<sub>4</sub><sup>+</sup>, and TNH<sub>x</sub> at 10 sampling sites in the pre-  
167 COVID-19 pandemic period (PC, January 1 to 23, 2020) and during the COVID-19  
168 pandemic period (DC, January 24 to February 29, 2020) are presented in Fig. 1, with  
169 their average concentration listed in Table 1. In general, rural sites exhibited higher  
170 concentrations of NH<sub>3</sub>, NH<sub>4</sub><sup>+</sup>, and TNH<sub>x</sub> compared to urban sites, except for the R-NY  
171 site. This finding is consistent with previous studies conducted in Zhengzhou (Wang et  
172 al., 2020), Shanghai (Chang et al., 2019), and Quzhou (Feng et al., 2022a), owing to  
173 the intense agricultural ammonia emissions. The highest concentrations of NH<sub>3</sub> and  
174 TNH<sub>x</sub> were recorded at site R-JZ, with average values of  $25.3 \pm 11.5$  and  $40.8 \pm 20.1$   
175  $\mu\text{g}/\text{m}^3$ , respectively. Site R-AY had the highest NH<sub>4</sub><sup>+</sup> concentration, measuring  $19.3 \pm$   
176  $12.9 \mu\text{g}/\text{m}^3$ . Note that the current study area exhibited higher NH<sub>3</sub> levels compared to  
177 other regions (Table S6), which probably was attributed to the highest NH<sub>3</sub> emissions  
178 of Henan Province in China, primarily from nitrogen fertilizer application and livestock  
179 farming (Wang et al., 2018; Ma, 2020).



180 Compared to the PC, NH<sub>3</sub> concentrations increased in the DC at all sites. Notably,  
181 rural sites experienced more significant increases in NH<sub>3</sub> concentrations than urban  
182 sites, which was similar to the trend in Shanghai (Xu et al., 2022). The largest increases  
183 in NH<sub>3</sub> concentrations were observed at R-SQ (71%, 7.3 µg/m<sup>3</sup>) and U-ZK (37%, 4.8  
184 µg/m<sup>3</sup>) for rural and urban sites, respectively. In contrast, the concentrations of NH<sub>4</sub><sup>+</sup>  
185 and TNH<sub>x</sub> decreased in the DC with the largest reduction at rural site R-PY (51%, 12.9  
186 µg/m<sup>3</sup>) and urban site U-ZMD (48%, 9.3 µg/m<sup>3</sup>). Regarding TNH<sub>x</sub>, rural sites exhibited  
187 larger reductions, with site R-SQ experiencing the largest decrease of 37% (4.7 µg/m<sup>3</sup>).

188 Figure 2 illustrates the spatial distribution and the diurnal variation of NH<sub>3</sub>  
189 concentrations at the ten sites before and during the pandemic. NH<sub>3</sub> concentrations in  
190 most sites exhibited an unimodal trend in PC that NH<sub>3</sub> concentrations gradually  
191 increased after sunrise, reaching a peak around noon (11:00–12:00), and then decreased  
192 to a valley around 16:00–17:00. This diurnal pattern is similar to NH<sub>3</sub> variations  
193 observed in urban areas of Houston, USA, as a result of the natural emissions from  
194 vegetation and soil during photosynthesis (Gong et al., 2011). However, other studies  
195 have recorded a significant NH<sub>3</sub> peak during the early morning of 8:00–10:00 (Ellis et  
196 al., 2011; Meng et al., 2018; Gu et al., 2022), suggesting the influence of vehicle  
197 emissions (Gong et al., 2011; Gu et al., 2022), residual NH<sub>3</sub> mixing, soil or plant  
198 emissions (Ellis et al., 2011), and dew volatilization (Wentworth et al., 2016; Huang et  
199 al., 2021b). Therefore, the NH<sub>3</sub> in urban and rural areas of this study was probably less  
200 affected by NH<sub>3</sub> emissions from vehicles, different from the recent studies in megacities  
201 of China (e.g., Beijing and Shanghai) (Gu et al., 2022; Wu et al., 2023; Zhang et al.,

202 2020b). In addition to the transport from agricultural emissions, urban  $\text{NH}_3$  in this  
203 region might also originate from other non-agricultural sources, such as wastewater  
204 treatment, coal combustion, household waste, urban green spaces, and human  
205 excrement (Chang et al., 2019).

206 During the COVID-19 pandemic, the diurnal variation of  $\text{NH}_3$  in both urban and rural  
207 sites still maintained a unimodal distribution. The peak values in urban sites remained  
208 consistent with PC levels, further demonstrating that the influence of vehicles on  $\text{NH}_3$   
209 in urban areas was limited. Notably, the peak time of  $\text{NH}_3$  in rural sites shifted 1–2 hours  
210 earlier compared to the trend in PC. Ammonia in rural areas primarily originates from  
211 nitrogen fertilizer application, livestock, and poultry breeding (Feng et al., 2022b;  
212 Meng et al., 2018), which are significantly influenced by T and RH (Liu et al., 2023).  
213 Table S7 and Fig. S4 reveal that there was an increased T and a decreased RH at rural  
214 sites in the DC than the PC, which could accelerate the evaporation of  $\text{NH}_3$  and thus  
215 potentially lead to earlier peak  $\text{NH}_3$  concentrations.

### 216 3.2 Gas-to-particle conversion of $\text{NH}_3$

217 The increased  $\text{NH}_3$  accompanying decreased  $\text{NH}_4^+$  in the DC suggests that the gas-  
218 particle partition of  $\text{NH}_3/\text{NH}_4^+$  may determine the elevated  $\text{NH}_3$  concentrations.

219 Meteorological parameters, including RH and T, play a crucial role in the gas-particle  
220 partitioning of  $\text{NH}_3$  (Liu et al., 2023; Xu et al., 2020). Therefore, the higher T and lower  
221 RH in the DC (Table S7 and Fig. S4) favored the conversion of  $\text{NH}_4^+$  to  $\text{NH}_3$ , resulting  
222 in a decrease in  $\epsilon(\text{NH}_4^+)$  ( $[\text{NH}_4^+]/([\text{NH}_3] + [\text{NH}_4^+])$ ) compared to those in the PC (Table

223 S7).

224 NH<sub>3</sub> primarily enters particles to neutralize acidic ions (Wang et al., 2020; Xu et al.,  
225 2020; Liu et al., 2017; Ye et al., 2011; Wells, 1998). Accordingly, the concentrations of  
226 required ammonia (Required-NH<sub>x</sub>) and excess ammonia (Excess-NH<sub>x</sub>) were calculated  
227 based on the acidic substances as follows (Wang et al., 2020):

$$\begin{aligned} \text{Required-NH}_x = & 17 \times \left( \frac{[\text{SO}_4^{2-}]}{48} + \frac{[\text{NO}_3^-]}{63} + \frac{[\text{Cl}^-]}{35.5} + \frac{[\text{HNO}_3]}{64} + \frac{[\text{HCl}]}{36.5} \right) \\ & - 17 \times \left( \frac{[\text{Na}^+]}{23} + \frac{[\text{K}^+]}{39} + \frac{[\text{Ca}^{2+}]}{20} + \frac{[\text{Mg}^{2+}]}{12} \right) \end{aligned} \quad (3.1)$$

$$\text{Excess-NH}_x = \text{TNH}_x - \text{Required-NH}_x \quad (3.2)$$

230 where [W] represents the concentration of the substance (μg/m<sup>3</sup>). The significant linear  
231 fitting (R<sup>2</sup> is greater than 0.96, and the slope is close to 1) in Fig. S5 demonstrates that  
232 the anions and cations at each site were close to the equilibrium state. Therefore, the  
233 organic acids in PM<sub>2.5</sub> may have less effect on NH<sub>3</sub> and NH<sub>4</sub><sup>+</sup> and were not considered  
234 in Formula 3.1.

235 As shown in Fig. 3 and Table S8, compared to those in the PC, the concentration of  
236 Required-NH<sub>x</sub> in the DC significantly decreased (ranging from 37% at site R-JZ to 58%  
237 at site R-PY), while the concentration of Excess-NH<sub>x</sub> increased (ranging from 9% at  
238 site R-AY to 78% at site R-SQ). The reduction in the concentrations of sulfate and  
239 nitrate (Fig. S6) was responsible for the decrease in the concentration of Required-NH<sub>x</sub>.  
240 To sum up, in addition to meteorological conditions, the substantial reduction in  
241 anthropogenic emissions of SO<sub>2</sub>, NO<sub>x</sub>, and other pollutants in the DC had led to a  
242 decrease in acidic substances (e.g., sulfate and nitrate) in particles, in turn, resulting in  
243 more gas-phase NH<sub>3</sub> concentration remaining in the atmosphere.

### 244 3.3 Particle pH before and during COVID-19

245 Diurnal patterns of particle pH in PC and DC at ten sites are summarized in Fig. 4  
246 with their average values listed in Table S9.  $PM_{2.5}$  shows consistent moderate acidity,  
247 with mean values in the range of 4.2–5.1, which were close to the values in previous  
248 studies (Table S9). Compared to the PC, the particle pH at ten sites increased obviously  
249 in the DC, with the highest increase of 0.5 (U-ZK) and 0.3 (R-PY) at urban and rural  
250 sites, respectively, which were the subject of in-depth discussion in the following text.

251 To explore the dominant factors that determine the local particle pH level and result  
252 in the high pH during the DC, sensitivity tests of pH to chemical species (i.e.,  $TNH_x$ ,  
253  $TH_2SO_4$ ,  $TNO_3$ , TCl, TNa,  $K^+$ ,  $Ca^{2+}$ , and  $Mg^{2+}$ ) and meteorological parameters (i.e., T  
254 and RH) were performed. A given range for a variable (i.e.,  $TNH_x$ ) with corresponding  
255 average values of other parameters (i.e.,  $TH_2SO_4$ ,  $TNO_3$ , TCl, TNa,  $K^+$ ,  $Ca^{2+}$ ,  $Mg^{2+}$ , T,  
256 and RH) was input into the model and simulated to compare its effects on pH. As shown  
257 in Fig. S7, pH increases with the cation concentrations (i.e.,  $TNH_x$ ,  $Na^+$ ,  $K^+$ ,  $Ca^{2+}$ , and  
258  $Mg^{2+}$ ) increasing as well as the anion concentrations (i.e.,  $TH_2SO_4$ ,  $TNO_3$ , and Cl<sup>-</sup>), T  
259 and RH decreasing. According to the average values of input data during PC (Blue line  
260 in Fig. S7) and DC (Red line in Fig. S7) at U-ZK and R-PY sites respectively, the  
261 changes in pH ( $\Delta pH$  in Fig. 5) indicate that the decrease in  $TNH_x$  concentration and the  
262 increase in T in DC led to a decrease in pH values ( $\Delta pH$ : 0.09 at U-ZK and 0.08 at R-  
263 PY sites) compared to PC. However, this effect was outweighed by the decrease in  
264  $TH_2SO_4$  ( $\Delta pH$ : 0.07 and 0.8 at U-ZK and R-PY sites, respectively) and  $TNO_3$  ( $\Delta pH$ :  
265 0.05 and 0.4 at U-ZK and R-PY sites, respectively) concentrations as well as the

266 increase in  $K^+$  ( $\Delta\text{pH}$ : 0.03 at U-ZK and 0.2 at R-PY site) and  $Mg^{2+}$  ( $\Delta\text{pH}$ : 0.01 at U-ZK  
267 and 0.04 at R-PY site) concentrations in the DC, and resulting in an overall increase in  
268 pH values in the DC. Furthermore, the relationship between particle pH with the  
269 concentrations of Required- $\text{NH}_x$ , and Excess- $\text{NH}_x$ , which considers all chemical  
270 components, is investigated to examine the dominant factor on the increasing pH in DC.  
271 As shown in Fig. 6, the higher Excess- $\text{NH}_x$  concentrations in the DC led to higher  
272 increases in pH values ( $\Delta\text{pH}$ : 1 at U-ZK and 0.5 at R-PY site) than those in PC ( $\Delta\text{pH}$ :  
273 0.3 at U-ZK and 0.2 at R-PY site), thus Excess- $\text{NH}_x$  concentrations may be the key  
274 factor in promoting the pH values.

### 275 **3.4 The influence of pH on HONO.**

276 The observed HONO concentrations decreased by 18% and 54% at U-ZK (0.8 ppb)  
277 and R-PY (0.9 ppb) sites in the DC, respectively, compared to those (1.0 and 2.2 ppb)  
278 in the PC. Moreover, all the known HONO production sources rates including  $P_{\text{emi}}$ ,  $P_{\text{OH}}$   
279 +  $\text{NO}$ ,  $P_{\text{ground}}$ ,  $P_{\text{ground+hv}}$ ,  $P_{\text{aerosol}}$ ,  $P_{\text{aerosol+hv}}$ , and  $P_{\text{nitrate}}$  (Fig. 7) show a decreasing trend from  
280 PC to DC, with the total reductions of 42% and 80% for U-ZK and R-PY, respectively.  
281 At the U-ZK,  $P_{\text{ground+hv}}$  decreased the most (84%), while at the R-PY,  $P_{\text{nitrate}}$  had the  
282 largest decrease about 85%, which was speculated to be related to the decrease of  $\text{NO}_x$   
283 and  $\text{NO}_3^-$  concentration in DC. Note that the reduction rates in the overall known source  
284 and almost individual sources were greater than the reduction rates in HONO  
285 concentrations (Figs. 7 and 8), thus we hypothesized that there should be other sources  
286 capable of promoting HONO production. Soil emission has been demonstrated to be a

287 major source of HONO, which is affected by temperature to some extent (Liu et al.,  
288 2020b, 2020c). However, there was no significant positive correlation with temperature  
289 in Fig. S8, and temperatures did not exceed 10°C during the study periods, suggesting  
290 that soil emission may not be a major contributor to HONO. Note that there were  
291 positive correlations between HONO with SO<sub>2</sub>, Excess-NH<sub>x</sub>, SO<sub>4</sub><sup>2-</sup>, and pH (Fig. S8)  
292 indicating that the R<sub>1</sub> reaction might form an amount of HONO and contribute to less  
293 reduction in the observed HONO concentrations.

294 Considering that R<sub>1</sub> mainly reacts in the liquid phase, the calculated reaction rates of  
295 R<sub>1</sub> under the conditions of RH > 60% in the PC and DC periods are illustrated in Figs.  
296 8 and S9. Despite the decrease in NO<sub>2</sub> and SO<sub>2</sub> concentrations in the DC, the increase  
297 in particle pH, increasing HSO<sub>3</sub><sup>-</sup> concentration in the aqueous phase, promoted the R<sub>1</sub>  
298 reaction rates by 58% and 59% at U-ZK and R-PY (Figure 8), respectively.  
299 Consequently, the enhanced R<sub>1</sub> reaction might prevent a large decrease in HONO (18%  
300 at U-ZK and 53% at R-PY) under the conditions of a significant reduction in vehicle  
301 emissions and a decline of 66% and 69% in NO<sub>2</sub> concentrations at U-ZK and R-PY,  
302 respectively.

### 303 **3.5 Uncertainty**

304 According to sensitivity tests of pH (Fig. S7) and R<sub>1</sub> (Fig. S10), pH increases with  
305 the concentrations of cations (TNH<sub>x</sub>, TNa, K<sup>+</sup>, Ca<sup>2+</sup>, and Mg<sup>2+</sup>) and OC increasing as  
306 well as anions (TH<sub>2</sub>SO<sub>4</sub>, TNO<sub>3</sub>, and Cl<sup>-</sup>) concentrations, T, and RH decreasing. R<sub>1</sub>  
307 reaction rate increases with the concentrations of AWC, NO<sub>2</sub>, SO<sub>2</sub>, pH, and pressure,

308 while increasing as well as T decreasing. Therefore, two extreme scenarios (i.e., the  
309 maximum and minimum rate scenarios) were evaluated to estimate the uncertainty of  
310 pH, and  $R_1$  based on the measurement uncertainties at the U-ZK and R-PY sites. Figure  
311 S11 suggests that the two extreme scenarios can be led to -10-7% and -71-125%  
312 uncertainties at the U-ZK site and -10-7% and -78-123% uncertainties at the R-PY  
313 site for pH and  $R_1$ , respectively.

#### 314 **4. Conclusions**

315 Elevated  $\text{NH}_3$  concentration was observed during the COVID-19 pandemic at both  
316 urban and rural sites in China. In addition to the rise in T and decrease in RH during the  
317 COVID-19 pandemic, which favored the conversion of  $\text{NH}_4^+$  to  $\text{NH}_3$ , the significant  
318 decrease in sulfate and nitrate concentrations led to the decline in Required- $\text{NH}_x$  and  
319 was beneficial to the particle-phase  $\text{NH}_4^+$  partitioning to gas-phase  $\text{NH}_3$ . Furthermore,  
320 under the environmental conditions of increased  $\text{NH}_3$  concentration and decreased  
321 acidic substance concentration, the pH values increased by 0.5 and 0.3 at U-ZK and R-  
322 PY increased during the pandemic, respectively. Consequently, the high pH values  
323 accelerated the formation rate of HONO through the oxidation-reduction reaction of  
324  $\text{NO}_2$  with  $\text{SO}_2$  (an increase of 58% at U-ZK and 59% at R-PY, respectively), partially  
325 compensating for the decrease in HONO concentration caused by the decline in vehicle  
326 emissions,  $\text{NO}_2$  and  $\text{NO}_3^-$  concentrations during the COVID-19 pandemic.

## 5. Implications

HONO plays a crucial role as a precursor to OH radicals in the tropospheric atmosphere (Xue, 2022). There have been significant observations of high HONO concentrations in urban areas during the daytime, leading to a growing interest in understanding its sources in atmospheric chemistry (Jiang et al., 2022; Xu et al., 2019). The heterogeneous reaction mechanism of NO<sub>2</sub> on aerosol surfaces is currently the focus of research on HONO sources, particularly in regions with elevated levels of atmospheric particulate matter, where it could potentially become a major contributor to HONO production (Zhang et al., 2022; Liao et al., 2021). One of the pathways for heterogeneous reactions on aerosol surfaces is the redox reaction of NO<sub>2</sub> with SO<sub>2</sub>. However, the significance of this reaction in HONO production in the real atmosphere is often overlooked, as it relies on the high pH of aerosols (Ge et al., 2019). In recent years, there has been increasing attention on the enhancing effect of NH<sub>3</sub> on the redox reaction, with laboratory experiments demonstrating its ability to generate substantial amounts of HONO (Ge et al., 2019). This study highlights the importance of this reaction based on actual atmospheric observations. Furthermore, numerous studies have indicated that if control over NH<sub>3</sub> emissions continues to relax while SO<sub>2</sub> and NO<sub>2</sub> emissions decrease, the particle pH in future China is expected to rise steadily (Xie et al., 2020; Song et al., 2019; Wang et al., 2020). Consequently, the redox reaction of NO<sub>2</sub> with SO<sub>2</sub> could become a significant source of HONO in China. Therefore, it is crucial to coordinate the control of SO<sub>2</sub>, NO<sub>x</sub>, and NH<sub>3</sub> emissions to avoid a rapid increase in the particle pH.



349

350 **Data availability:** All the data presented in this article can be accessed through  
351 <https://zenodo.org/records/10273539>. (Zhang, 2023).

352

353 **Author contributions.** XZ Data Curation, Writing - Original Draft, Visualization.  
354 LW, NW, SM, and DZ Investigation, Visualization, Data Curation. DZ, HZ, and MW  
355 Investigation. SW Conceptualization, Data Curation, Supervision. RZ Data Curation,  
356 Funding acquisition. All people are involved in the discussion of the results.

357

358 **Competing interest.** The authors declare no competing financial interest.

359

360 **Acknowledgments.** This work was supported by the China Postdoctoral Science  
361 Foundation (2023M733220), the Zhengzhou PM<sub>2.5</sub> and O<sub>3</sub> Collaborative Control and  
362 Monitoring Project (20220347A), and the National Key Research and Development  
363 Program of China (No. 2017YFC0212403).

364 **References**

- 365 Alicke, B.: OH formation by HONO photolysis during the BERLIOZ experiment, J.  
366 Geophys. Res.; 108, 8247, <https://doi.org/10.1029/2001JD000579>, 2003.
- 367 Atkinson, R., Baulch, D.L., Cox, R.A., Crowley, J.N., Hampson, R.F., Hynes, R.G.,  
368 Jenkin, M.E., and Rossi, M. J., Troe, J.: Evaluated kinetic and photochemical data  
369 for atmospheric chemistry: volume I - gas phase reactions of O<sub>x</sub>, HO<sub>x</sub>, NO<sub>x</sub> and  
370 SO<sub>x</sub> species., Atmos. Chem. Phys., 4,1461–1738, [https://doi.org/10.5194/acp-4-](https://doi.org/10.5194/acp-4-1461-2004)  
371 [1461-2004](https://doi.org/10.5194/acp-4-1461-2004), 2004.
- 372 Bougiatioti, A., Nikolaou, P., Stavroulas, I., Kouvarakis, G., Weber, R., Nenes, A.,  
373 Kanakidou, M., and Mihalopoulos, N.: Particle water and pH in the eastern  
374 Mediterranean: source variability and implications for nutrient availability, Atmos.  
375 Chem. Phys., 16, 4579–4591, <https://doi.org/10.5194/acp-16-4579-2016>, 2016.
- 376 Chang, Y., Zou, Z., Zhang, Y., Deng, C., Hu, J., Shi, Z., Dore, A. J., and Collett, J. L.,  
377 Jr.: Assessing contributions of agricultural and nonagricultural emissions to  
378 atmospheric ammonia in a Chinese megacity. Environ. Sci. Technol. 53, 1822–  
379 1833., <https://doi.org/10.1021/acs.est.8b05984>, 2019.
- 380 Chen, X., Walker, J. T., and Geron, C.: Chromatography related performance of the  
381 monitor for aerosols and gases in ambient air (MARGA): laboratory and field-  
382 based evaluation. Atmos. Meas. Tech. 10, 3893–3908.  
383 <https://doi.org/10.5194/amt-10-3893-2017>, 2017.
- 384 Cheng, Y., Zheng, G., Wei, C., Mu, Q., Zheng, B., Wang, Z., Gao, M., Z., Q., He, K.,  
385 Carmichael, G., Pöschl, U., and Su, and H.: Reactive nitrogen chemistry in aerosol

386 water as a source of sulfate during haze events in China, *Sci. Adv.* 2, e1601530.,  
387 <https://doi.org/10.1126/sciadv.1601530>, 2019.

388 Chow, J. C., Lowenthal, D. H., Chen, L. W. A., Wang, X., and Watson, J. G.: Mass  
389 reconstruction methods for PM<sub>2.5</sub>: a review, *Air Qual. Atmos. Health.*, 8, 243 – 263,  
390 <https://doi.org/10.1007/s11869-015-0338-3>, 2015.

391 Cui, L.: Impact of COVID-19 restrictions on the concentration and source  
392 apportionment of atmospheric ammonia (NH<sub>3</sub>) across India, *Sci. Total Environ.*,  
393 881, <https://doi.org/10.1016/j.scitotenv.2023.163443>, 2023.

394 Ding, J., Zhao, P., Su, J., Dong, Q., Du, X., and Zhang, Y.: Aerosol pH and its driving  
395 factors in Beijing, *Atmos. Chem. Phys.* 19, 7939–7954.,  
396 <https://doi.org/10.5194/acp-19-7939-2019>, 2019.

397 Ellis, R. A., Murphy, J. G., Markovic, M. Z., VandenBoer, T. C., Makar, P. A., Brook,  
398 J., and Mihele, C.: The influence of gas-particle partitioning and surface-  
399 atmosphere exchange on ammonia during BAQS-Met, *Atmos. Chem. Phys.* 11,  
400 133–145., <https://doi.org/10.5194/acp-11-133-2011>, 2011.

401 Feng, S., Xu, W., Cheng, M., Ma, Y., Wu, L., Kang, J., Wang, K., Tang, A., Collett, J.  
402 L., Fang, Y., Goulding, K., Liu, X., and Zhang, F.: Overlooked nonagricultural and  
403 wintertime agricultural NH<sub>3</sub> emissions in Quzhou county, north China plain:  
404 evidence from <sup>15</sup>N-Stable Isotopes. *Environ. Sci. Technol. Lett.* 9, 127–133,  
405 <https://doi.org/10.1021/acs.estlett.1c00935>, 2022a.

406 Feng, T., Zhao, S., Liu, L., Long, X., Gao, C., and Wu, N.: Nitrous acid emission from  
407 soil bacteria and related environmental effect over the North China Plain, *Chemos.*,  
408 287, <https://doi.org/10.1016/j.chemosphere.2021.132034>, 2022b.

409 Fountoukis, C., Nenes, A.: ISORROPIA II: a computationally efficient thermodynamic

410 equilibrium model for  $\text{K}^+$ - $\text{Ca}^{2+}$ - $\text{Mg}^{2+}$ - $\text{NH}_4^+$ - $\text{Na}^+$ - $\text{SO}_4^{2-}$ - $\text{NO}_3^-$ - $\text{Cl}^-$ - $\text{H}_2\text{O}$  aerosols.  
411 Atmos. Chem. Phys. 7, 4639–4659, <https://doi.org/10.5194/acp-7-4639-2007>,  
412 2007.

413 Ge, S., Wang, G., Zhang, S., Li, D., and Zhang, H.: Abundant  $\text{NH}_3$  in China enhances  
414 atmospheric HONO production by promoting the heterogeneous reaction of  $\text{SO}_2$   
415 with  $\text{NO}_2$ . Environ. Sci. Technol. 53, 14339–14347,  
416 <https://doi.org/10.1021/acs.est.9b04196>, 2019.

417 Gong, L., Lewicki, R., Griffin, R. J., Flynn, J. H., Lefer, B. L., and Tittel, F. K.:  
418 Atmospheric ammonia measurements in Houston, TX using an external-cavity  
419 quantum cascade laser-based sensor, Atmos. Chem. Phys. 11, 9721–9733,  
420 <https://doi.org/10.5194/acp-11-9721-2011>, 2011.

421 Gu, M., Pan, Y., Walters, W. W., Sun, Q., Song, L., Wang, Y., Xue, Y., and Fang, Y.:  
422 vehicular emissions enhanced ammonia concentrations in winter mornings: insights  
423 from diurnal nitrogen isotopic signatures. Environ. Sci. Technol. 56, 1578–1585,  
424 <https://doi.org/10.1021/acs.est.1c05884>, 2022.

425 Gunthe, S. S., Rose, D., Su, H., Garland, R. M., Achtert, P., Nowak, A., Wiedensohler,  
426 A., Kuwata, M., Takegawa, N., Kondo, Y., Hu, M., Shao, M., Zhu, T., Andreae, M.  
427 O., and Pöschl, U.: Cloud condensation nuclei (CCN) from fresh and aged air  
428 pollution in the megacity region of Beijing, Atmos. Chem. Phys., 11, 11023 –  
429 11039, <https://doi.org/10.5194/acp-11-11023-2011>, 2011.

430 Han, S., Hong, J., Luo, Q., Xu, H., Tan, H., Wang, Q., Tao, J., Zhou, Y., Peng, L., He,  
431 Y., Shi, J., Ma, N., Cheng, Y., and Su, H.: Hygroscopicity of organic compounds  
432 as a function of organic functionality, water solubility, molecular weight, and

433 oxidation level, *Atmos. Chem. Phys.*, 22, 3985–4004, [https://doi.org/10.5194/acp-](https://doi.org/10.5194/acp-22-3985-2022)  
434 [22-3985-2022](https://doi.org/10.5194/acp-22-3985-2022), 2022.

435 Huang, X., Ding, A., Gao, J., Zheng, B., Zhou, D., Qi, X., Tang, R., Wang, J., Ren, C.,  
436 Nie, W., Chi, X., Xu, Z., Chen, L., Li, Y., Che, F., Pang, N., Wang, H., Tong, D.,  
437 Qin, W., Cheng, W., Liu, W., Fu, Q., Liu, B., Chai, F., Davis, S. J., Zhang, Q., and  
438 He, K.: Enhanced secondary pollution offset reduction of primary emissions  
439 during COVID-19 lockdown in China, *Natl Sci Rev*, 8, nwaal37,  
440 <https://doi.org/10.1093/nsr/nwaa137>, 2021a.

441 Huang, X., Zhang, J., Zhang, W., Tang, G., and Wang, Y.: Atmospheric ammonia and  
442 its effect on PM<sub>2.5</sub> pollution in urban Chengdu, Sichuan Basin, China. *Environ.*  
443 *Pollut.* 291, 118–195. <https://doi.org/10.1016/j.envpol.2021.118195>, 2021b.

444 Jiang, Y., Xue, L., Shen, H., Dong, C., Xiao, Z., and Wang, W.: Dominant processes of  
445 HONO derived from multiple field observations in contrasting environments.  
446 *Environ. Sci. Technol. Lett.* 9, 258–264,  
447 <https://doi.org/10.1021/acs.estlett.2c00004>, 2022.

448 Kleffmann, J., Gavriiloaiei, T., Hofzumahaus, A., Holland, F., Koppmann, R., Rupp, L.,  
449 Schlosser, E., Siese, M., and Wahner, A.: Daytime formation of nitrous acid: A  
450 major source of OH radicals in a forest, *Geophys. Res. Lett.*, 32,  
451 <https://doi.org/10.1029/2005gl022524>, 2005.

452 Kramer, L. J., Crilley, L. R., Adams, T. J., Ball, S. M., Pope, F. D., and Bloss, W. J.:  
453 Nitrous acid (HONO) emissions under real-world driving conditions from vehicles  
454 in a UK road tunnel, *Atmos. Chem. Phys.* 20, 5231–5248,

455 <https://doi.org/10.5194/acp-20-5231-2020>, 2020.

456 Li, J., An, X., Cui, M., Sun, Z., Wang, C., and Li, Y.: Simulation study on regional  
457 atmospheric oxidation capacity and precursor sensitivity, *Atmos. Environ.* 263,  
458 118657, <https://doi.org/10.1016/j.atmosenv.2021.118657>, 2021a.

459 Li, S., Song, W., Zhan, H., Zhang, Y., Zhang, X., Li, W., Tong, S., Pei, C., Wang, Y.,  
460 Chen, Y., Huang, Z., Zhang, R., Zhu, M., Fang, H., Wu, Z., Wang, J., Luo, S., Fu,  
461 X., Xiao, S., Huang, X., Zeng, J., Zhang, H., Chen, D., Gligorovski, S., Ge, M.,  
462 George, C., and Wang, X.: Contribution of vehicle emission and NO<sub>2</sub> surface  
463 conversion to nitrous acid (HONO) in urban environments: implications from tests  
464 in a tunnel. *Environ. Sci. Technol.*, 55, 15616–15624,  
465 <https://doi.org/10.1021/acs.est.1c00405>, 2021.

466 Liao, S., Zhang, J., Yu, F., Zhu, M., Liu, J., Ou, J., Dong, H., Sha, Q., Zhong, Z., Xie,  
467 Y., Luo, H., Zhang, L., and Zheng, J.: High gaseous nitrous acid (HONO)  
468 emissions from light-duty diesel vehicles. *Environ. Sci. Technol.* 55, 200–208,  
469 <https://doi.org/10.1021/acs.est.0c05599>, 2021.

470 Liu, J., Deng, H., Lakey, P. S. J., Jiang, H., Mekic, M., Wang, X., Shiraiwa, M., and  
471 Gligorovski, S.: Unexpectedly high indoor HONO concentrations associated with  
472 photochemical NO<sub>2</sub> transformation on glass windows. *Environ. Sci. Technol.* 54,  
473 15680–15688, <https://doi.org/10.1021/acs.est.0c05624>, 2020a.

474 Liu, M., Song, Y., Zhou, T., Xu, Z., Yan, C., Zheng, M., Wu, Z., Hu, M., Wu, Y., and  
475 Zhu, T.: Fine particle pH during severe haze episodes in northern China. *Geophys.*  
476 *Res. Lett.* 44, 5213–5221, <https://doi.org/10.1002/2017gl073210>, 2017.

477 Liu, P., Chen, H., Song, Y., Xue, C., Ye, C., Zhao, X., Zhang, C., Liu, J., and Mu, Y.:  
478 Atmospheric ammonia in the rural North China Plain during wintertime: variations,  
479 sources, and implications for HONO heterogeneous formation. *Sci. Total. Environ.*  
480 861, 160768, <https://doi.org/10.1016/j.scitotenv.2022.160768>, 2023.

481 Liu, Y., Ni, S., Jiang, T., Xing, S., Zhang, Y., Bao, X., Feng, Z., Fan, X., Zhang, L., and  
482 Feng, H.: Influence of Chinese New Year overlapping COVID-19 lockdown on  
483 HONO sources in Shijiazhuang, *Sci. Total Environ.*, 745, 141025,  
484 <https://doi.org/10.1016/j.scitotenv.2020.141025>, 2020b.

485 Liu, Y., Zhang, Y., Lian, C., Yan, C., Feng, Z., Zheng, F., Fan, X., Chen, Y., Wang, W.,  
486 Chu, B., Wang, Y., Cai, J., Du, W., Daellenbach, K. R., Kangasluoma, J., Bianchi,  
487 F., Kujansuu, J., Petäjä, T., Wang, X., Hu, B., Wang, Y., Ge, M., He, H., and  
488 Kulmala, M.: The promotion effect of nitrous acid on aerosol formation in  
489 wintertime in Beijing: The possible contribution of traffic-related emissions,  
490 *Atmos. Chem. Phys*, 20, 13023–13040, [https://doi.org/10.5194/acp-20-13023-](https://doi.org/10.5194/acp-20-13023-2020)  
491 [2020](https://doi.org/10.5194/acp-20-13023-2020), 2020c.

492 Liu, Z., Wang, Y., Costabile, F., Amoroso, A., Zhao, C., Huey, L. G., Stickel, R., Liao,  
493 J., and Zhu, T.: Evidence of aerosols as a media for rapid daytime HONO  
494 production over China, *Environ. Sci. Technol.*, 48, 13023–13040,  
495 <https://doi.org/10.1021/es504163z>, 2014.

496 Lu, K., Guo, S., Tan, Z., Wang, H., Shang, D., Liu, Y., Li, X., Wu, Z., Hu, M., and  
497 Zhang, Y.: Exploring atmospheric free-radical chemistry in China: the self-  
498 cleansing capacity and the formation of secondary air pollution, *Natl. Sci. Rev.*, 6,

499 [579-594, https://doi.org/10.1093/nsr/nwy073](https://doi.org/10.1093/nsr/nwy073), 2018.

500 Luo, L., Bai, X., Lv, Y., Liu, S., Guo, Z., Liu, W., Hao, Y., Sun, Y., Hao, J., Zhang, K.,  
501 Zhao, H., Lin, S., Zhao, S., Xiao, Y., Yang, J., and Tian, H.: Exploring the driving  
502 factors of haze events in Beijing during Chinese New Year holidays in 2020 and  
503 2021 under the influence of COVID-19 pandemic, *Sci. Total Environ.*, 859,  
504 160172, <https://doi.org/10.1016/j.scitotenv.2022.160172>, 2023.

505 Ma, S.: High-resolution assessment of ammonia emissions in China: Inventories,  
506 driving forces and mitigation, *Atmos. Environ.*, 229,  
507 <https://doi.org/10.1016/j.atmosenv.2020.117458>, 2020.

508 McFall, A. S., Edwards, K. C., and Anastasio, C.: Nitrate photochemistry at the air-ice  
509 interface and in other ice reservoirs, *Environ. Sci. Technol.*, 52, 5710–5717,  
510 <https://doi.org/10.1021/acs.est.8b00095>, 2018.

511 Meng, Z., Xu, X., Lin, W., Ge, B., Xie, Y., Song, B., Jia, S., Zhang, R., Peng, W., Wang,  
512 Y., Cheng, H., Yang, W., and Zhao, H.: Role of ambient ammonia in particulate  
513 ammonium formation at a rural site in the North China Plain, *Atmos. Chem. Phys.*,  
514 18, 167–184, <https://doi.org/10.5194/acp-18-167-2018>, 2018.

515 Meusel, H., Tamm, A., Kuhn, U., Wu, D., Leifke, A. L., Fiedler, S., Ruckteschler, N.,  
516 Yordanova, P., Lang-Yona, N., Pöhlker, M., Lelieveld, J., Hoffmann, T., Pöschl,  
517 U., Su, H., Weber, B., and Cheng, Y.: Emission of nitrous acid from soil and  
518 biological soil crusts represents an important source of HONO in the remote  
519 atmosphere in Cyprus, *Atmos. Chem. Phys.*, 18, 799 – 813,  
520 <https://doi.org/10.5194/acp-18-799-2018>, 2018.

521 Oswald, R., Behrendt, T., Ermel, M., Wu, D., Su, H., Cheng, Y., Breuninger, C.,  
522 Moravek, A., Mougín, E., Delon, C., Loubet, B., Pommerening-Roser, A., Sorgel,



523 M., Poschl, U., and Hoffmann, T., Andreae, M.O., Meixner, F.X., Trebs, I.: HONO  
524 emissions from soil bacteria as a major source of atmospheric reactive nitrogen.,  
525 Science. 341, 1233–1235, <https://www.science.org/doi/10.1126/science.1242266>,  
526 2013.

527 Pagsberg, P., Bjergbakke, E., Ratajczak, E., Sillesen, A.: Kinetics of the gas phase  
528 reaction  $\text{OH} + \text{NO} (+\text{M}) \rightarrow \text{HONO} (+\text{M})$  and the determination of the UV  
529 absorption cross sections of HONO., Chem. Phys. Lett. 272, 383–390,  
530 [https://doi.org/10.1016/s0009-2614\(97\)00576-9](https://doi.org/10.1016/s0009-2614(97)00576-9), 1997.

531 Platt, U., Perner, D., Harris, G. W., Winer, A. M., and Pitts, J. N.: Observations of  
532 nitrous acid in an urban atmosphere by differential optical absorption, Nature, 285,  
533 312–314, <https://doi.org/10.1038/285312a0>, 1980.

534 Romer, P. S., Wooldridge, P. J., Crouse, J. D., Kim, M. J., Wennberg, P. O., Dibb, J.  
535 E., Scheuer, E., Blake, D. R., Meinardi, S., Brosius, A. L., Thames, A. B., Miller,  
536 D. O., Brune, W. H., Hall, S. R., Ryerson, T. B., and Cohen, R. C.: Constraints on  
537 aerosol nitrate photolysis as a potential source of HONO and  $\text{NO}_x$ . Environ. Sci.  
538 Technol. 52, 13738–13746, <https://doi.org/10.1021/acs.est.8b03861>, 2018.

539 Scharko, N. K., Berke, A. E., and Raff, J. D.: Release of nitrous acid and nitrogen  
540 dioxide from nitrate photolysis in acidic aqueous solutions, Environ. Sci. Technol.,  
541 48, 11991–12001, <https://doi.org/10.1021/es503088x>, 2014.

542 Shi, Q., Tao, Y., Krechmer, J. E., Heald, C. L., Murphy, J. G., Kroll, J. H., and Ye, Q.:  
543 Laboratory investigation of renoxification from the photolysis of inorganic  
544 particulate nitrate, Environ. Sci. Technol., 55, 854–861,

545 <https://doi.org/10.1021/acs.est.0c06049>, 2021.

546 Song, S., Gao, M., Xu, W., Shao, J., Shi, G., Wang, S., Wang, Y., Sun, Y., and McElroy,  
547 M. B.: Fine-particle pH for Beijing winter haze as inferred from different  
548 thermodynamic equilibrium models, *Atmos. Chem. Phys.*, 18, 7423–7438,  
549 <https://doi.org/10.5194/acp-18-7423-2018>, 2018.

550 Song, S., Nenes, A., Gao, M., Zhang, Y., Liu, P., Shao, J., Ye, D., Xu, W., Lei, L., Sun,  
551 Y., Liu, B., Wang, S., and McElroy, M. B.: Thermodynamic modeling suggests  
552 declines in water uptake and acidity of inorganic aerosols in Beijing winter haze  
553 events during 2014/2015–2018/2019. *Environ. Sci. Technol. Lett.* 6, 752–760,  
554 <https://doi.org/10.1021/acs.estlett.9b00621>, 2019.

555 Spataro, F., and Ianniello, A.: Sources of atmospheric nitrous acid: state of the science,  
556 current research needs, and future prospects, *J. Air. Waste. Manag. Assoc.*, 64,  
557 1232–1250, <https://doi.org/10.1080/10962247.2014.952846>, 2014.

558 Stieger, B., Spindler, G., van Pinxteren, D., Grüner, A., Wallasch, M., and Herrmann,  
559 H.: Development of an online-coupled MARGA upgrade for the 2 h interval  
560 quantification of low-molecular-weight organic acids in the gas and particle phases,  
561 *Atmos. Meas. Tech.* 12, 281–298, <https://doi.org/10.5194/amt-12-281-2019>, 2019.

562 Su, H., Cheng, Y., Oswald, R., Behrendt, T., Trebs, I., Meixner, F.X., Andreae, M.O.,  
563 Cheng, P., and Zhang, Y., Poschl, U.: Soil nitrite as a source of atmospheric HONO  
564 and OH radicals., *Science*. 333, 1616–1618,  
565 <https://doi.org/10.1126/science.1207687>, 2011.

566 Twigg, M. M., Berkhout, A. J. C., Cowan, N., Crunaire, S., Dammers, E., Ebert, V.,

567 Gaudion, V., Haaima, M., Häni, C., John, L., Jones, M. R., Kamps, B., Kentisbeer,  
568 J., Kupper, T., Leeson, S. R., Leuenberger, D., Lüttschwager, N. O. B., Makkonen,  
569 U., Martin, N. A., Missler, D., Mounsor, D., Neftel, A., Nelson, C., Nemitz, E.,  
570 Oudwater, R., Pascale, C., Petit, J.-E., Pogany, A., Redon, N., Sintermann, J.,  
571 Stephens, A., Sutton, M. A., Tang, Y. S., Zijlmans, R., Braban, C. F., and  
572 Niederhauser, B.: Intercomparison of in situ measurements of ambient NH<sub>3</sub>:  
573 instrument performance and application under field conditions, *Atmos. Meas.*  
574 *Tech.* 15, 6755–6787, <https://doi.org/10.5194/amt-15-6755-2022>, 2022.

575 Wang, C., Yin, S., Bai, L., Zhang, X., Gu, X., Zhang, H., Lu, Q., and Zhang, R.: High-  
576 resolution ammonia emission inventories with comprehensive analysis and  
577 evaluation in Henan, China, 2006–2016, *Atmos. Environ.* 193, 11–23,  
578 <https://doi.org/10.1016/j.atmosenv.2018.08.063>, 2018.

579 Wang, S., Wang, L., Li, Y., Wang, C., Wang, W., Yin, S., and Zhang, R.: Effect of  
580 ammonia on fine-particle pH in agricultural regions of China: comparison between  
581 urban and rural sites, *Atmos. Chem. Phys.*, 20, 2719–2734,  
582 <https://doi.org/10.5194/acp-20-2719-2020>, 2020.

583 Wang, S., Wang, L., Fan, X., Wang, N., Ma, S., and Zhang, R.: Formation pathway of  
584 secondary inorganic aerosol and its influencing factors in Northern China:  
585 Comparison between urban and rural sites, *Sci. Total Environ.*, 840,  
586 <https://doi.org/10.1016/j.scitotenv.2022.156404>, 2022.

587 Wang, S., Fan, X., Xu, Y., Zhang, R., and Ren, B.: Insight into the non-linear responses  
588 of particulate sulfate to reduced SO<sub>2</sub> concentration: A perspective from the

589 aqueous-phase reactions in a megacity in Northern China, *Atmos. Res.*, 290,  
590 <https://doi.org/10.1016/j.atmosres.2023.106796>, 2023a.

591 Wang, W., Wang, S., Xu, J., Zhou, R., Shi, C., and Zhou, B.: Gas-phase ammonia and  
592 PM<sub>2.5</sub> ammonium in a busy traffic area of Nanjing, China, *Environ. Sci. Pollut.*  
593 *Res. Int.*, 23, 1691–1702, <https://doi.org/10.1007/s11356-015-5397-3>, 2016.

594 Wang, Y., Jin, X., Liu, Z., Wang, G., Tang, G., Lu, K., Hu, B., Wang, S., Li, G., An, X.,  
595 Wang, C., Hu, Q., He, L., Zhang, F., and Zhang, Y.: Progress in quantitative  
596 research on the relationship between atmospheric oxidation and air quality, *J.*  
597 *Environ. Sci.*, 123, 350–366, <https://doi.org/10.1016/j.jes.2022.06.029>, 2023b.

598 Wells, M., Choulaton, T. W., and Bower, K. N.: A modelling study of the interaction  
599 of ammonia with cloud., *Atmos. Environ.*, 32, 359–363,  
600 [https://doi.org/10.1016/s1352-2310\(97\)00199-4](https://doi.org/10.1016/s1352-2310(97)00199-4), 1998.

601 Wentworth, G. R., Murphy, J. G., Benedict, K. B., Bangs, E. J., and Collett Jr, J. L.: The  
602 role of dew as a night-time reservoir and morning source for atmospheric ammonia,  
603 *Atmos. Chem. Phys.* 16, 7435–7449, <https://doi.org/10.5194/acp-16-7435-2016>,  
604 2016.

605 Wu, C., Lv, S., Wang, F., Liu, X., Li, J., Liu, L., Zhang, S., Du, W., Liu, S., Zhang, F.,  
606 Li, J., Meng, J., and Wang, G.: Ammonia in urban atmosphere can be substantially  
607 reduced by vehicle emission control: A case study in Shanghai, China, *J. Environ.*  
608 *Sci.*, 126, 754–760, <https://doi.org/10.1016/j.jes.2022.04.043>, 2023.

609 Xie, Y., Wang, G., Wang, X., Chen, J., Chen, Y., Tang, G., Wang, L., Ge, S., Xue, G.,  
610 Wang, Y., and Gao, J.: Nitrate-dominated PM<sub>2.5</sub> and elevation of particle pH

611 observed in urban Beijing during the winter of 2017. *Atmos. Chem. Phys.* 20,  
612 5019–5033, <https://doi.org/10.5194/acp-20-5019-2020>, 2020.

613 Xing, L., Fu, T. M., Cao, J. J., Lee, S. C., Wang, G. H., Ho, K. F., Cheng, M. C., You,  
614 C. F., and Wang, T. J.: Seasonal and spatial variability of the OM/OC mass ratios  
615 and high regional correlation between oxalic acid and zinc in Chinese urban  
616 organic aerosols, *Atmos. Chem. Phys.*, 13, 4307–4318,  
617 <https://doi.org/10.5194/acp-13-4307-2013>, 2013.

618 Xu, J., Chen, J., Zhao, N., Wang, G., Yu, G., Li, H., Huo, J., Lin, Y., Fu, Q., Guo, H.,  
619 Deng, C., Lee, S.-H., Chen, J., and Huang, K.: Importance of gas-particle  
620 partitioning of ammonia in haze formation in the rural agricultural environment,  
621 *Atmos. Chem. Phys.* 20, 7259–7269, <https://doi.org/10.5194/acp-20-7259-2020>,  
622 2020.

623 Xu, W., Kuang, Y., Zhao, C., Tao, J., Zhao, G., Bian, Y., Yang, W., Yu, Y., Shen, C.,  
624 Liang, L., Zhang, G., Lin, W., and Xu, X.: NH<sub>3</sub>-promoted hydrolysis of NO<sub>2</sub>  
625 induces explosive growth in HONO, *Atmos. Chem. Phys.* 19, 10557–10570,  
626 <https://doi.org/10.5194/acp-19-10557-2019>, 2019.

627 Xu, W., Zhao, Y., Wen, Z., Chang, Y., Pan, Y., Sun, Y., Ma, X., Sha, Z., Li, Z., Kang, J.,  
628 Liu, L., Tang, A., Wang, K., Zhang, Y., Guo, Y., Zhang, L., Sheng, L., Zhang, X.,  
629 Gu, B., Song, Y., Van Damme, M., Clarisse, L., Coheur, P. F., Collett, J. L., Jr.,  
630 Goulding, K., Zhang, F., He, K., and Liu, X.: Increasing importance of ammonia  
631 emission abatement in PM<sub>2.5</sub> pollution control. *Sci. Bull.* 67, 1745–1749,  
632 <https://doi.org/10.1016/j.scib.2022.07.021>, 2022.

633 Xue, C.: Substantially growing interest in the chemistry of nitrous acid (HONO) in  
634 China: current achievements, problems, and future directions. *Environ. Sci.*  
635 *Technol.* 56, 7375–7377. <https://doi.org/10.1021/acs.est.2c02237>, 2022.

636 Ye, C., Zhang, N., Gao, H., and Zhou, X.: Photolysis of particulate nitrate as a source  
637 of HONO and NO<sub>x</sub>. *Environ. Sci. Technol.* 51, 6849–6856,  
638 <https://doi.org/10.1021/acs.est.7b00387>, 2017.

639 Ye, X., Ma, Z., Zhang, J., Du, H., Chen, J., Chen, H., Yang, X., Gao, W., and Geng, F.:  
640 Important role of ammonia on haze formation in Shanghai, *Environ. Res. Lett.* 6,  
641 024019, <https://doi.org/10.1088/1748-9326/6/2/024019>, 2011.

642 Zhang, W., Tong, S., Jia, C., Wang, L., Liu, B., Tang, G., Ji, D., Hu, B., Liu, Z., Li, W.,  
643 Wang, Z., Liu, Y., Wang, Y., and Ge, M.: Different HONO sources for three layers  
644 at the urban area of Beijing. *Environ. Sci. Technol.* 54, 12870–12880,  
645 <https://doi.org/10.1021/acs.est.0c02146>, 2020a.

646 Zhang, W., Tong, S., Jia, C., Ge, M., Ji, D., Zhang, C., Liu, P., Zhao, X., Mu, Y., Hu, B.,  
647 Wang, L., Tang, G., Li, X., Li, W., and Wang, Z.: Effect of different combustion  
648 processes on atmospheric nitrous acid formation mechanisms: a winter  
649 comparative observation in urban, suburban and rural areas of the North China  
650 Plain. *Environ. Sci. Technol.* 56, 4828–4837,  
651 <https://doi.org/10.1021/acs.est.1c07784>, 2022.

652 Zhang, Y., Liu, X., Fang, Y., Liu, D., Tang, A., and Collett, J. L.: Atmospheric ammonia  
653 in Beijing during the COVID-19 outbreak: concentrations, sources, and  
654 implications. *Environ. Sci. Technol. Lett.* 8, 32–38,



656 **Figures:**

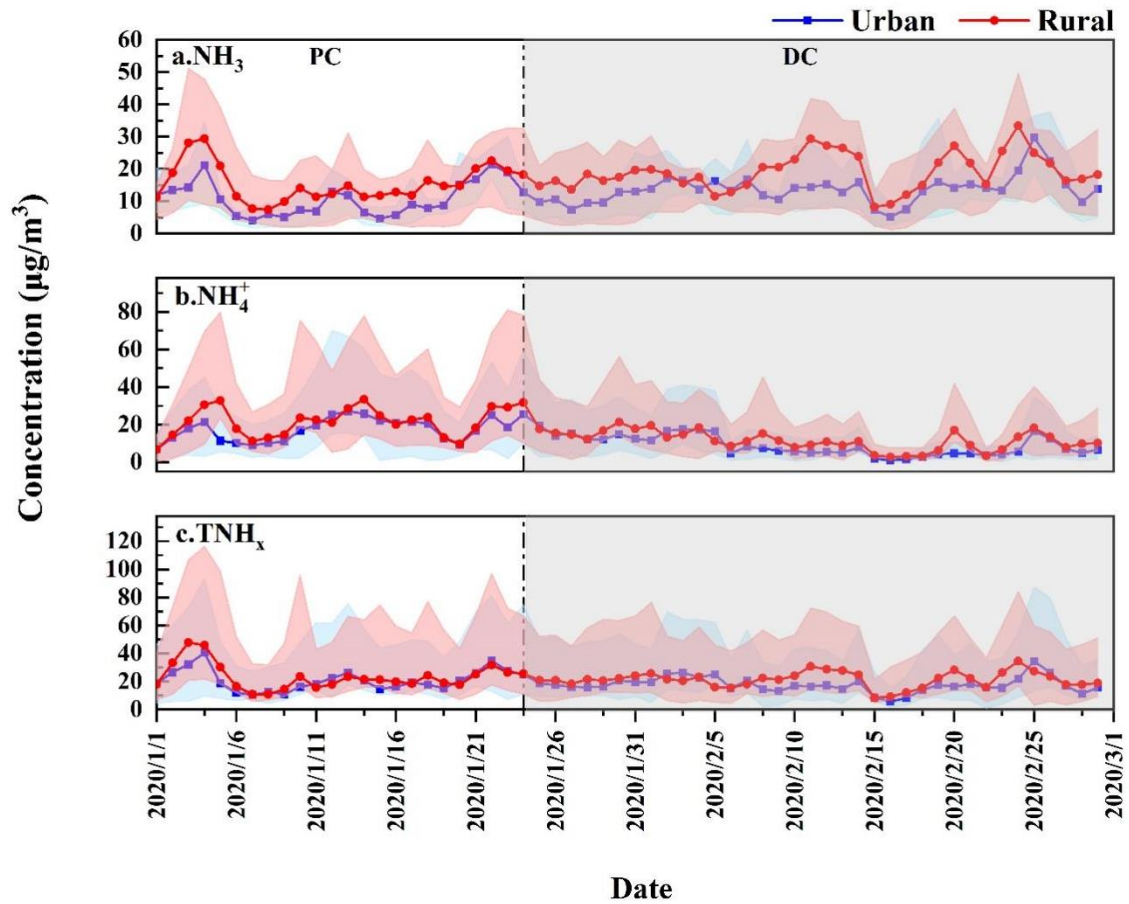

657

658 Figure 1. Temporal variations of a. NH<sub>3</sub>, b. NH<sub>4</sub><sup>+</sup>, and c. TNH<sub>x</sub> at the urban and rural

659 sites before (PC) and during (DC) the COVID-19 outbreak, respectively. The shaded

660 areas of the curve represent the maximum and minimum values.



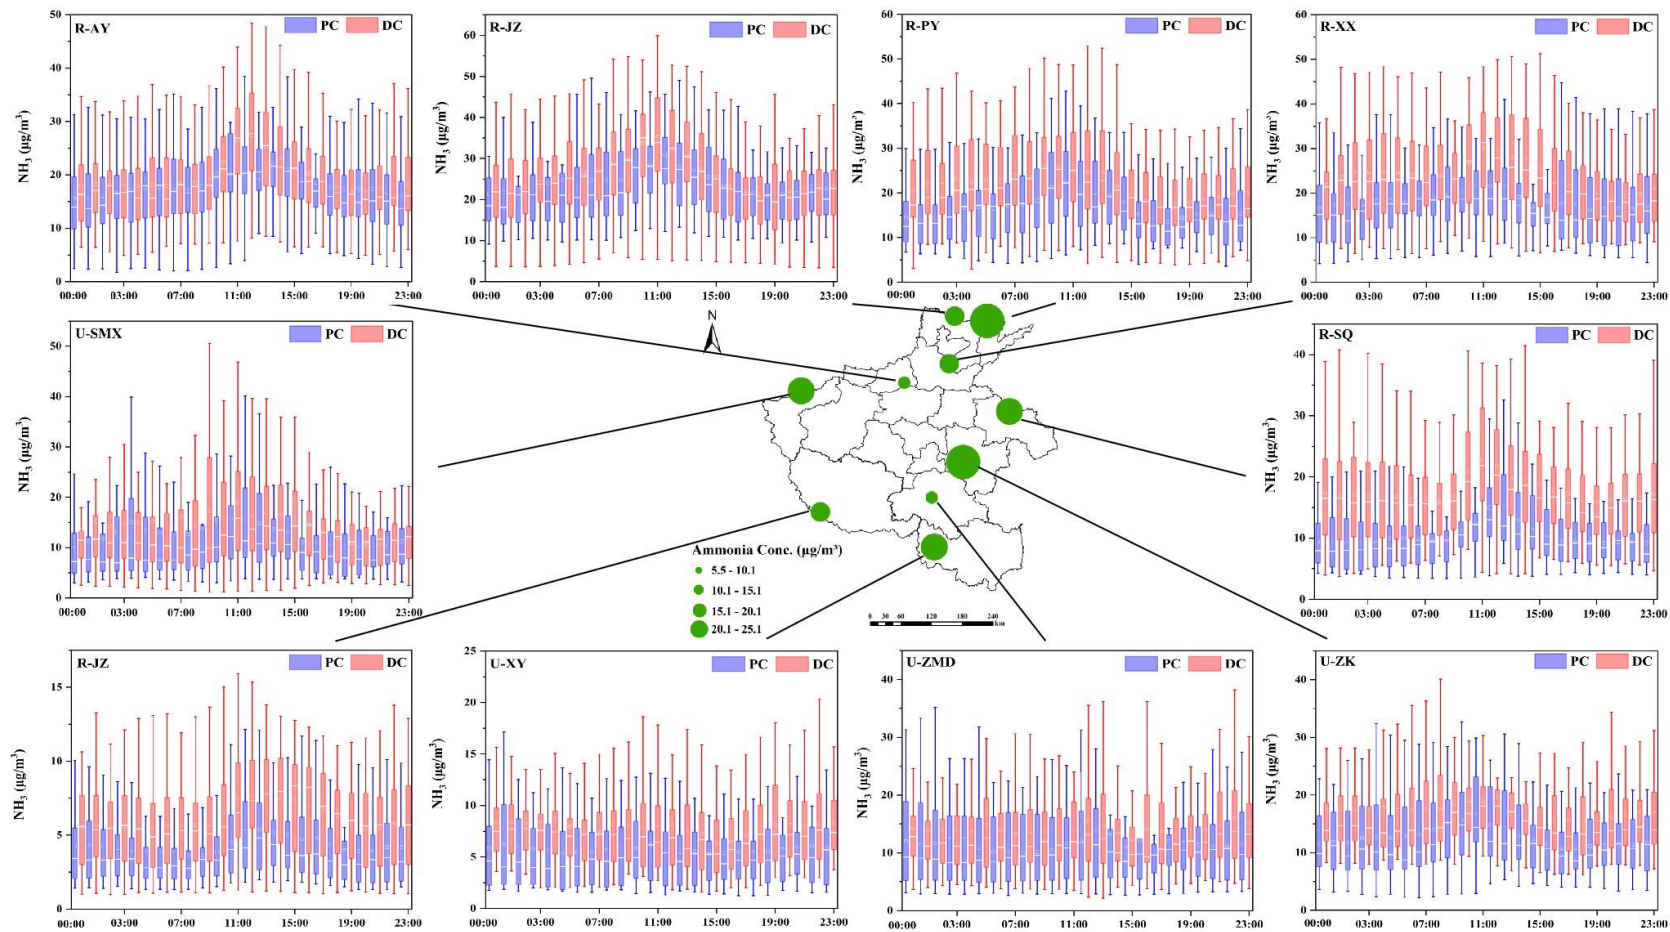

661

662

663

664

Figure 2. Daily variation of  $\text{NH}_3$  concentrations at ten sites before (PC) and during (DC) the COVID-19 outbreak. The green dots represent the location of ten sites and their size represents the concentration of  $\text{NH}_3$ ; In each box, the top, middle, and bottom lines represent the 75, 50, and 25 percentiles of statistical data, respectively; the upper and lower whiskers represent the 90 and 10 percentiles of statistical data, respectively.

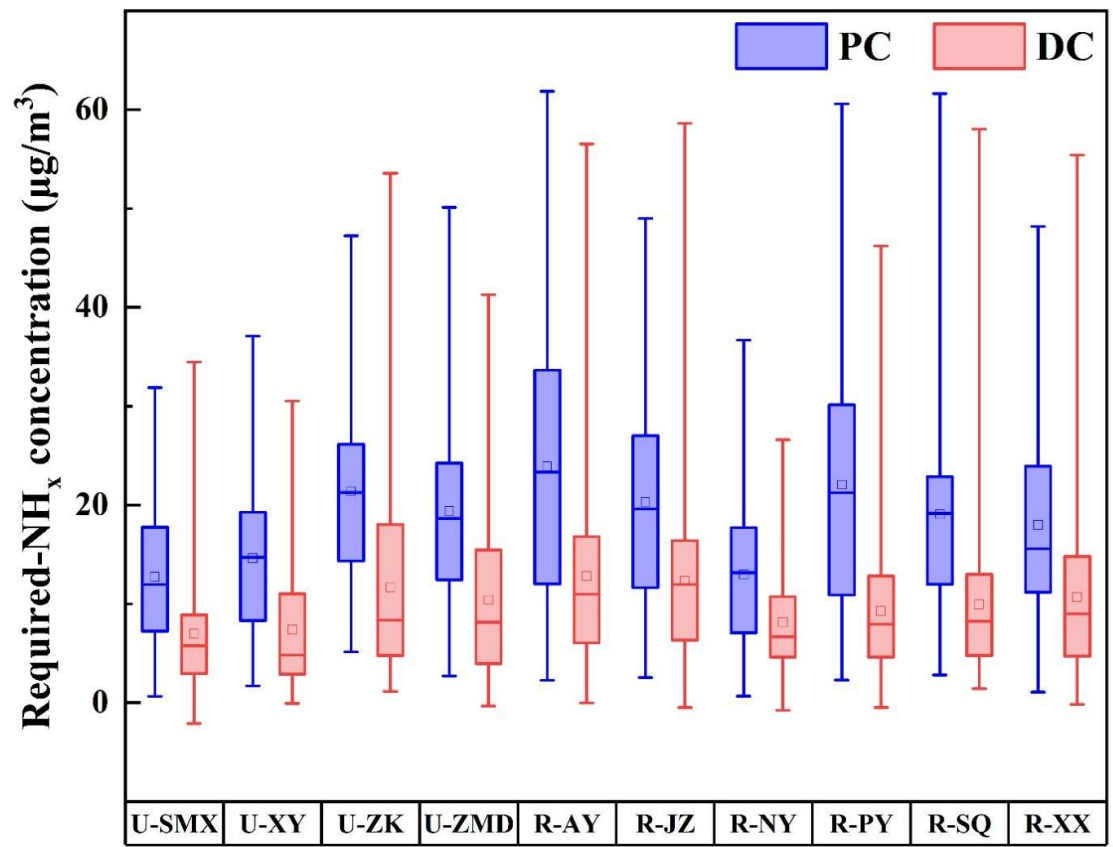

665

666 Figure 3. Box diagram of changes in Required-NH<sub>x</sub> at ten sites before (PC) and during

667 (DC) the COVID-19 outbreak. In each box, the top, middle, and bottom lines represent

668 the 75, 50, and 25 percentiles of statistical data, respectively; the upper and lower

669 whiskers represent the 90 and 10 percentiles of statistical data, respectively.

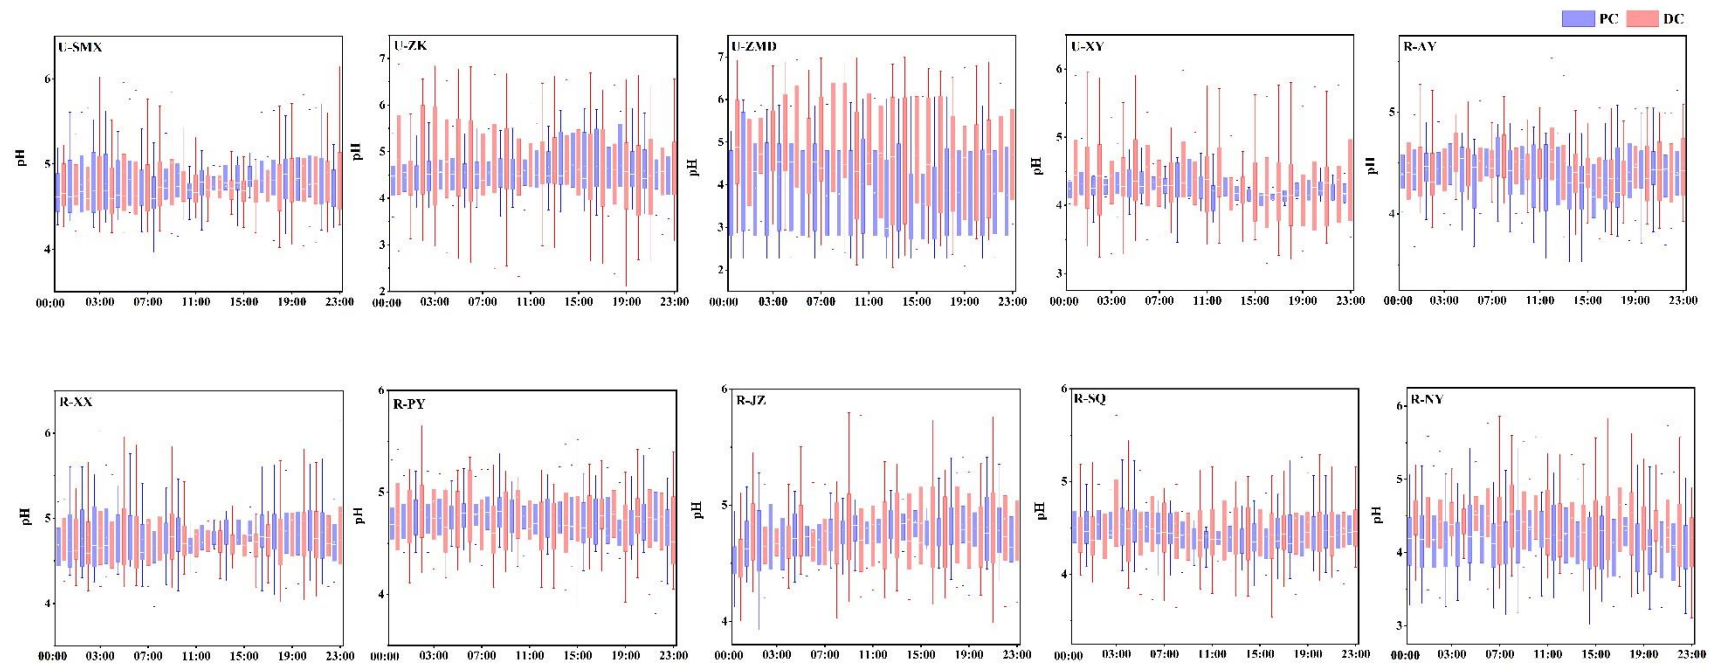

670

671 Figure 4. Diurnal patterns of pH at ten sites before (PC) and during (DC) the COVID-19 outbreak. In each box, the top, middle, and bottom  
 672 lines represent the 75, 50, and 25 percentiles of statistical data, respectively; the upper and lower whiskers represent the 90 and 10 percentiles of  
 673 statistical data, respectively.

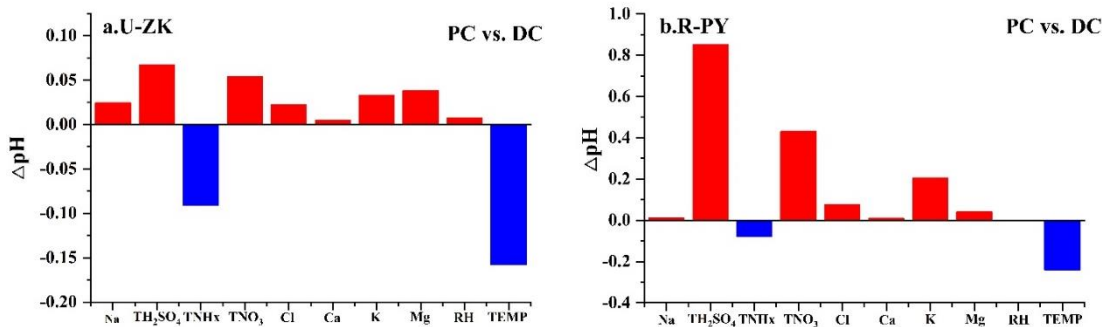

674

675 Figure 5. Changes of pH ( $\Delta\text{pH}$ ) through the sensitivity tests (Figure S5 and S6) by

676 changing parameters between PC and DC at the a. U-ZK and b. R-PY sites.

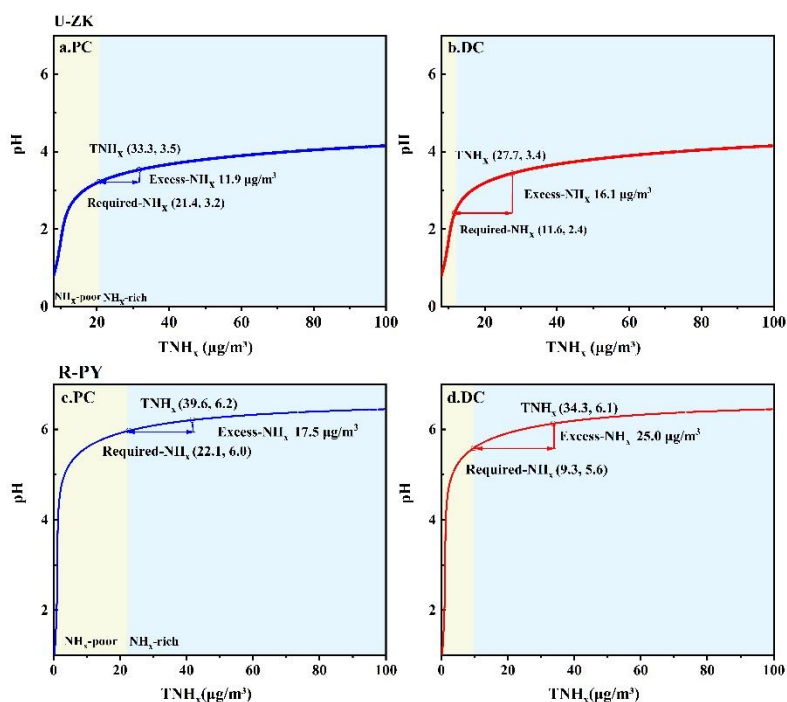

677

678 Figure 6. Particle pH corresponds to increasing  $\text{TNH}_x$  at U-ZK and R-PY sites to

679 examine the effects of major indicators of  $\text{NH}_3$  (i.e.,  $\text{TNH}_x$ , Required- $\text{NH}_x$ , and Excess-

680  $\text{NH}_x$ ) on aerosol acidity. Particle pH was calculated by using a wide range of  $\text{TNH}_x$

681 ( $25\text{--}130\ \mu\text{g}/\text{m}^3$ ) and average values of other parameters in PC and DC of U-ZK and R-

682 PY sites. The concentrations of  $\text{TNH}_x$ , Required- $\text{NH}_x$ , and Excess- $\text{NH}_x$  with

683 corresponding pH values are marked by a hollow box, hollow circle, and arrow

684 respectively. The yellow and blue background colors correspond to the  $\text{NH}_x$ -poor and

685  $\text{NH}_x$ -rich, respectively.

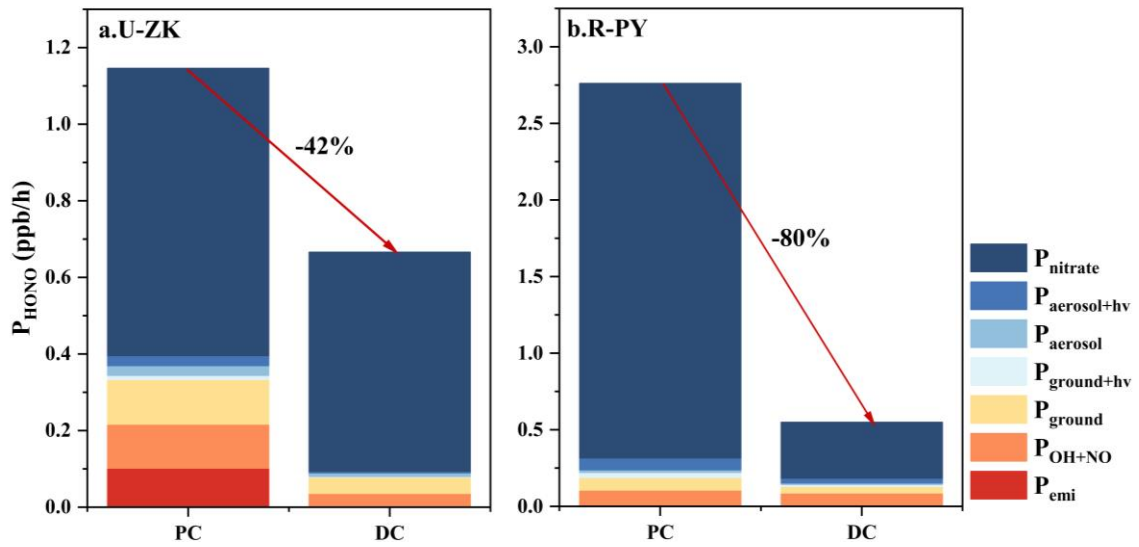

686

687 Figure 7. Comparison of HONO sources at a. U-ZK and b. R-PY sites before (PC) and

688 during (DC) the COVID-19 outbreak. The calculation method can be found in Text S4.

689

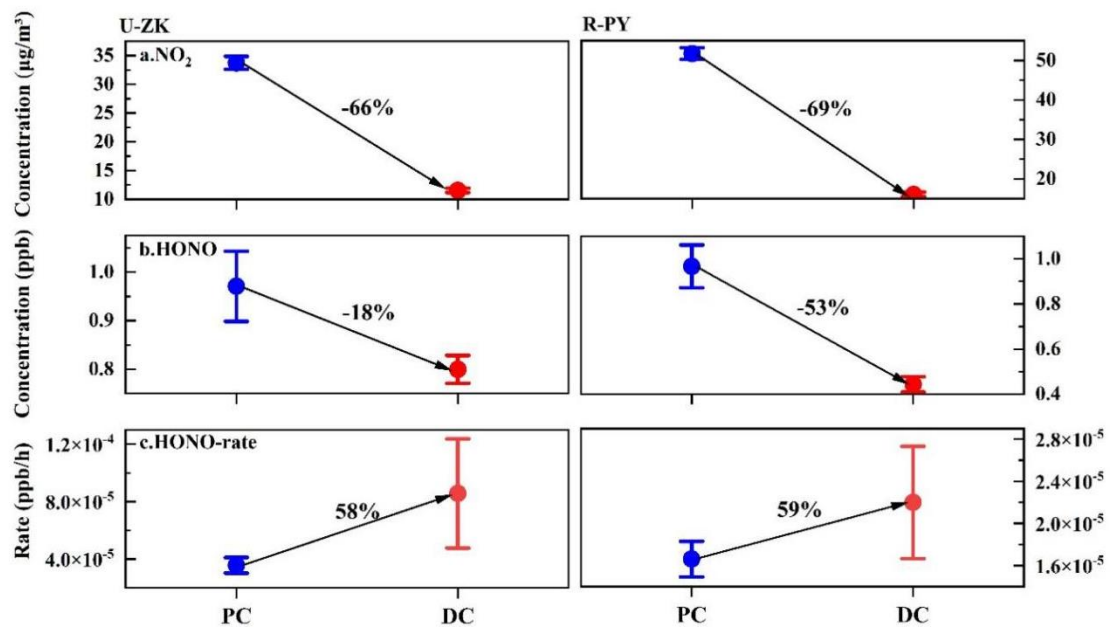

690

691 Figure 8. Decline ratios of a.  $\text{NO}_2$ , b. HONO concentration, and c. HONO production

692 rate at U-ZK and R-PY sites before (PC) and during (DC) the COVID-19 outbreak. The

693 center point represents the mean value, and the upper and lower whiskers represent the

694 95% confidence interval of the mean.

695 **Table:**

696 Table 1. Changes in concentrations (mean  $\pm$  standard deviation) of  $\text{NH}_3$ ,  $\text{NH}_4^+$ , and  
 697  $\text{TNH}_x$  at ten sites during entire periods (Average), before (PC), and during (DC) the  
 698 COVID-19 outbreak.

| Sites | Substances      | Average ( $\mu\text{g}/\text{m}^3$ ) | PC ( $\mu\text{g}/\text{m}^3$ ) | DC ( $\mu\text{g}/\text{m}^3$ ) |
|-------|-----------------|--------------------------------------|---------------------------------|---------------------------------|
| U-SMX | $\text{NH}_3$   | $13.8 \pm 10.8$                      | $12.6 \pm 10.1$                 | $14.5 \pm 11.1$                 |
|       | $\text{NH}_4^+$ | $10.9 \pm 7.2$                       | $14.2 \pm 7.2$                  | $8.8 \pm 6.5$                   |
|       | $\text{TNH}_x$  | $22.9 \pm 14.1$                      | $24.9 \pm 14.5$                 | $21.7 \pm 13.8$                 |
| U-ZK  | $\text{NH}_3$   | $15.6 \pm 8.3$                       | $12.7 \pm 6.5$                  | $17.4 \pm 8.8$                  |
|       | $\text{NH}_4^+$ | $13.6 \pm 9.3$                       | $19.1 \pm 8.4$                  | $10.3 \pm 8.1$                  |
|       | $\text{TNH}_x$  | $28.6 \pm 13.7$                      | $30.9 \pm 12.8$                 | $27.1 \pm 14.0$                 |
| U-ZMD | $\text{NH}_3$   | $13.1 \pm 8.4$                       | $11.6 \pm 8.2$                  | $14.0 \pm 8.4$                  |
|       | $\text{NH}_4^+$ | $13.9 \pm 9.8$                       | $19.6 \pm 10.3$                 | $10.3 \pm 7.5$                  |
|       | $\text{TNH}_x$  | $25.7 \pm 14.6$                      | $30.3 \pm 15.1$                 | $22.8 \pm 13.5$                 |
| U-XY  | $\text{NH}_3$   | $7.0 \pm 4.3$                        | $5.7 \pm 4.0$                   | $7.9 \pm 4.3$                   |
|       | $\text{NH}_4^+$ | $11.0 \pm 7.7$                       | $15.4 \pm 7.6$                  | $8.3 \pm 6.5$                   |
|       | $\text{TNH}_x$  | $17.6 \pm 9.8$                       | $20.6 \pm 10.1$                 | $15.7 \pm 9.2$                  |
| R-AY  | $\text{NH}_3$   | $19.0 \pm 8.4$                       | $17.9 \pm 8.3$                  | $19.7 \pm 8.4$                  |
|       | $\text{NH}_4^+$ | $19.3 \pm 12.9$                      | $26.4 \pm 13.7$                 | $15.0 \pm 10.3$                 |
|       | $\text{TNH}_x$  | $36.6 \pm 18.2$                      | $41.7 \pm 20.4$                 | $33.4 \pm 16.0$                 |
| R-XX  | $\text{NH}_3$   | $21.7 \pm 10.2$                      | $18.1 \pm 9.3$                  | $23.8 \pm 10.1$                 |
|       | $\text{NH}_4^+$ | $15.9 \pm 10.4$                      | $20.6 \pm 11.0$                 | $13.0 \pm 8.8$                  |
|       | $\text{TNH}_x$  | $34.9 \pm 17.0$                      | $35.1 \pm 18.8$                 | $34.8 \pm 15.8$                 |
| R-PY  | $\text{NH}_3$   | $19.8 \pm 9.4$                       | $16.8 \pm 8.1$                  | $21.7 \pm 9.6$                  |
|       | $\text{NH}_4^+$ | $17.4 \pm 11.8$                      | $25.3 \pm 12.6$                 | $12.4 \pm 8.0$                  |
|       | $\text{TNH}_x$  | $35.2 \pm 17.8$                      | $39.4 \pm 19.8$                 | $32.6 \pm 15.7$                 |
| R-JZ  | $\text{NH}_3$   | $25.3 \pm 11.5$                      | $24.1 \pm 11.5$                 | $25.9 \pm 11.4$                 |
|       | $\text{NH}_4^+$ | $17.3 \pm 11.3$                      | $22.7 \pm 11.6$                 | $14.2 \pm 9.9$                  |
|       | $\text{TNH}_x$  | $40.8 \pm 20.1$                      | $42.9 \pm 22.8$                 | $33.5 \pm 18.2$                 |
| R-SQ  | $\text{NH}_3$   | $15.0 \pm 7.9$                       | $10.3 \pm 5.2$                  | $17.7 \pm 7.9$                  |
|       | $\text{NH}_4^+$ | $13.4 \pm 8.5$                       | $18.9 \pm 8.6$                  | $10.3 \pm 6.7$                  |
|       | $\text{TNH}_x$  | $26.3 \pm 13.2$                      | $25.5 \pm 14.0$                 | $26.8 \pm 12.7$                 |
| R-NY  | $\text{NH}_3$   | $5.5 \pm 3.1$                        | $4.3 \pm 2.7$                   | $6.2 \pm 3.2$                   |
|       | $\text{NH}_4^+$ | $10.2 \pm 6.9$                       | $13.3 \pm 7.2$                  | $8.4 \pm 6.1$                   |
|       | $\text{TNH}_x$  | $14.8 \pm 8.5$                       | $16.0 \pm 9.5$                  | $14.1 \pm 7.8$                  |

699

# 1 Supplement materials:

## 2 Text S1 Detailed description of the aerosol and gas monitor.

3 The aerosol and gas monitor (MARGA, Metrohm, Switzerland) was used to analyze  
4 the hourly water-soluble ions ( $\text{Na}^+$ ,  $\text{NH}_4^+$ ,  $\text{K}^+$ ,  $\text{Mg}^{2+}$ ,  $\text{Ca}^{2+}$ ,  $\text{Cl}^-$ ,  $\text{NO}_3^-$ , and  $\text{SO}_4^{2-}$ ) in  
5  $\text{PM}_{2.5}$ , as well as gaseous species ( $\text{NH}_3$ ,  $\text{HNO}_3$ ,  $\text{HCl}$ , and  $\text{HONO}$ ) at ten sampling sites.  
6 The atmospheric sample passes through a  $\text{PM}_{2.5}$  cut-off head, and both particles and  
7 gases enter a wet rotating dissolution device for diffusion. Subsequently, the particles  
8 in the sample undergo hygroscopic growth and condensation in an aerosol  
9 supersaturated vapor generator, followed by collection and ion chromatographic  
10 analysis. The gases in the sample are oxidized by  $\text{H}_2\text{O}_2$  in the dissolution device,  
11 absorbed into a liquid solvent, and then entered the gas sample collection chamber for  
12 ion chromatographic quantification. During this process, the sample is extracted  
13 through a liquid diffusion filter, where interfering acidic and alkaline gases are removed.  
14 To achieve high collection efficiency, the airflow containing loaded ions then enters an  
15 aerosol supersaturated collector until the particles can be injected into the ion  
16 chromatograph. The ion chromatography system utilizes either suppressor or non-  
17 suppressor conductivity detection methods for ion analysis. Before running the samples,  
18 the ion chromatograph system needs to be calibrated using standard solutions. By  
19 comparing the data obtained from the sample with the data obtained from known  
20 standard solutions, the identification and quantification of sample ions can be

21 performed. The data acquisition system generates chromatograms, and the  
22 chromatography software further converts each peak in the chromatogram into sample  
23 concentrations and outputs the results.

#### 24 **QA/QC**

25 The instrument underwent daily checks and maintenance, which typically involved  
26 ensuring the stability of the internal standard response and maintaining a relative error  
27 within  $\pm 10\%$  between the measured and theoretical concentrations of the internal  
28 standard. The system's data acquisition and transmission were carefully examined,  
29 along with monitoring the instrument's status information and collected data. This  
30 included checking parameters such as sampling flow rate, chromatographic column  
31 pressure, column temperature, conductivity, target compound peak retention time, and  
32 peak width to ensure their normal functioning. Regular replacement of consumables  
33 used by the instrument was carried out at predetermined intervals and frequencies.  
34 Additionally, standard curve measurements and calibration were performed in each  
35 season to guarantee the accuracy of the instrument's data. Calibration curve verification  
36 was performed at least once per quarter. A standard series containing at least 6  
37 calibration points, including zero concentration, was prepared using standard solutions.  
38 The concentration range of the calibration curve was set according to the actual  
39 environmental concentration levels and determined by manual injection. The obtained  
40 calibration curve had a linear correlation coefficient ( $r$ ) of  $\geq 0.995$ . If this requirement  
41 was not met, the rationality of the internal standard solution concentration settings



42 would be checked. When key components such as the quantitative loop,  
43 chromatographic column, or suppressor are replaced, a new calibration curve will be  
44 promptly established. After establishing the new calibration curve, the sample sequence  
45 in the analysis software would be updated. The minimum detection limit was  
46 determined as follows:  $0.002 \mu\text{g}/\text{m}^3$  ( $\text{Cl}^-$ ),  $0.081 \mu\text{g}/\text{m}^3$  ( $\text{NH}_4^+$ ),  $0.02 \mu\text{g}/\text{m}^3$  ( $\text{NO}_3^-$ ),  $0.06$   
47  $\mu\text{g}/\text{m}^3$  ( $\text{SO}_4^{2-}$ ),  $0.002 \mu\text{g}/\text{m}^3$  ( $\text{Na}^+$ ),  $0.08 \mu\text{g}/\text{m}^3$  ( $\text{K}^+$ ),  $0.06 \mu\text{g}/\text{m}^3$  ( $\text{Ca}^{2+}$ ) and  $0.007 \mu\text{g}/\text{m}^3$   
48 ( $\text{Mg}^{2+}$ ). According to the research about the uncertainties in MARGA measurements,  
49 such as a 20% uncertainty for MARGA measurements (Song et al., 2018), an error of  
50 10% for detecting  $\text{SO}_4^{2-}$ ,  $\text{NO}_3^-$ , and  $\text{HNO}_3$ , and 15% for  $\text{NH}_3$  and  $\text{NH}_4^+$  (Rumsey et al.,  
51 2014), we set the uncertainties of 20% for  $\text{NH}_3$  and  $\text{NH}_4^+$ , 10% for other components.  
52 Due to the complex conditions encountered during the actual sampling process,  
53 including variations in calibration slopes, sampling volumes, solvent concentrations,  
54 temperature, atmospheric pressure, and sampling flow rates at different sampling points,  
55 the assumed values mentioned above may not accurately reflect the actual situation.

## 56 **Text S2 HONO measurement**

57 The HONO monitoring method adopted in MARGA is the wet-flow diffusion tube  
58 method (WEDD) in the diffusion tube method (Zellweger, 1999; Takeuchi et al, 2013),  
59 which is a common method for measuring HONO in wet chemistry and has high  
60 absorption efficiency. The device adopts a vertical setting, through the diffusion tube,  
61 the air in the atmosphere is pulled upward from the bottom, and the absorbent liquid is  
62 transported to the top of the diffusion tube through the air pump. When flowing under  
63 the action of gravity, a thin absorbent liquid film will be generated on the inner surface  
64 of the tube by the tension. The absorbent liquid film will absorb HONO, and the  
65 solution at the bottom of the diffusion tube will be sucked out through the air pump.  
66 Then it is sent to the ion chromatography for analysis. The integration time of the  
67 sample mainly depends on the running time of the ion chromatography, which is about  
68 5-30 min (Zellweger, 1999; Takeuchi et al, 2013). Based on the original, some scholars  
69 developed the flow injection-chemiluminescence method and used it together with  
70 WEDD for the measurement of HONO. The detection limit is about  $0.03 \mu\text{g}/\text{m}^3$   
71 (Mikuska et al., 2008; Zhao et al., 2010). In addition, HONO observations measured  
72 with this AIM-IC system agree well with HONO observations measured with the other  
73 systems (VandenBoer et al., 2014). Therefore, it is feasible to measure HONO using  
74 this instrument.

75 **Text S3 Detailed description of the NO<sub>2</sub>, SO<sub>2</sub> and carbon analyzer.**

76 The NO<sub>2</sub> analyzer utilized the chemiluminescence technique to measure the  
77 concentration of NO<sub>2</sub> in the air. This involved converting NO<sub>2</sub> to NO using a  
78 molybdenum converter, and then quantifying the NO concentration. The principle  
79 behind the SO<sub>2</sub> analyzer involved measuring the amount of ultraviolet light emitted  
80 during the decay of high-energy state SO<sub>2</sub>. This emitted light was used to calculate the  
81 concentration of SO<sub>2</sub>.

82 The carbon analyzer principle is primarily based on the NIOSH-5040 method, which  
83 involves analyzing the thermal optical transmittance of quartz filter samples. It employs  
84 a calibrated non-dispersive infrared sensor to detect the evolving carbon. Under  
85 controlled conditions with inert helium gas, carbon formed during a gradually  
86 increasing temperature gradient is referred to as OC, while carbon evolved under a  
87 mixture of 90% helium.

88 **Text S4 Sources of HONO**

89 **4.1 Direct emission**

90 HONO can be released directly into the atmosphere through vehicle exhaust  
91 (Burling et al., 2010; Veres et al., 2010). The lifetime of HONO in the atmosphere is  
92 relatively short, so vehicle emissions significantly contribute to urban atmospheric  
93 HONO (Chen et al., 2023; Liu et al., 2021a). Considering that there has been a

94 significant reduction in vehicle emissions in urban areas during DC. Additionally, the  
95 R-PY site is far from roads. Thus, vehicle emissions may not be the primary source of  
96 HONO for the U-ZK site during DC and R-PY sites during entire periods. To further  
97 validate the above conclusions, the conditional bivariate probability function diagrams  
98 of NO<sub>2</sub> at U-ZK and R-PY sites during PC and DC are depicted in Figure S2. NO<sub>2</sub>  
99 predominantly originated from long-distance transport at the U-ZK site during DC and  
100 the R-PY site during both PC and DC. Consequently, vehicle emissions are only  
101 calculated for the U-ZK site during the PC.

102 Here we use the HONO/NO<sub>x</sub> ratio to estimate HONO concentration, which is  
103 generally considered to be the vehicle emission factor (Kramer et al., 2020; Hao et al.,  
104 2020; Yu et al., 2022) for HONO. The calculation formula is as follows:

$$105 \quad [HONO_{emi}] = 0.8\% \times [NO_x] \quad (1)$$

106 where [HONO<sub>emi</sub>] and [NO<sub>x</sub>] represent the HONO concentration emitted by vehicles  
107 and the observed NO<sub>x</sub> concentration, respectively. Regarding previous studies (Table  
108 S3), 0.8% was selected as the vehicle emission factor, considering differences in vehicle  
109 type, fuel composition, and other factors (Kramer et al., 2020; Hao et al., 2020; Huang  
110 et al., 2017).

#### 111 4.2 Homogeneous reaction of NO and •OH

112 The reaction between NO and •OH is the primary gas-phase reaction source of  
113 HONO at high NO concentrations, and the production rate contribution (P<sub>OH+NO</sub>) for this

114 reaction can be calculated as:

$$115 \quad P_{\text{OH+NO}} = k_{\text{OH+NO}}[\text{OH}][\text{NO}] \quad (2)$$

116 where  $k_{\text{OH+NO}}$  ( $7.2 \times 10^{-12} \text{ cm}^3 \text{ molecule}^{-1} \text{ s}^{-1}$ ) is the rate constant for the reactions at  
117 298K (Li et al., 2012). •OH concentration was simulated according to the empirical  
118 model (Hu et al., 2022; Wang et al., 2025):

$$119 \quad [\text{OH}] = 4.1 \times 10^9 \times \frac{J(\text{O}^1\text{D}) \times J(\text{NO}_2) \times (140 \times [\text{NO}_2] + 1) + [\text{HONO}] \times J(\text{HONO})}{0.41 \times [\text{NO}_2]^2 + 1.7 \times [\text{NO}_2] + 1 + [\text{NO}] \times k_{\text{NO+OH}} + [\text{HONO}] \times k_{\text{NO+OH}}} \quad (3)$$

120 where,  $J(\text{O}^1\text{D})$ ,  $J(\text{NO}_2)$ , and  $J(\text{HONO})$  are the photolysis rates calculated using the  
121 TUV model (v5.2; available at <http://cprm.acom.ucar.edu/Models/TUV/>). The cloud  
122 optical depth value for the TUV model was adjusted so that the predicted UVB radiation  
123 intensity matched the observations (Lyu et al., 2019; Wang et al., 2022b). The calculated  
124 •OH concentration varied from  $0.1 \times 10^6$  to  $4 \times 10^6$  molecule/cm<sup>3</sup> at U-ZK and  $0.1 \times$   
125  $10^6$  to  $5 \times 10^6$  molecule/cm<sup>3</sup> at R-PY, which was comparable to the levels in other cities  
126 of North China (Li et al., 2018; Fuchs et al., 2017; Yang et al., 2017). Since there is no  
127 photolysis at night, the •OH concentration was assumed to be  $0.8 \times 10^6$  molecule/cm<sup>3</sup>  
128 (Wang et al., 2022).

## 129 4.3 Heterogeneous conversion of NO<sub>2</sub> to HONO

### 130 4.3.1 Heterogeneous dark reactions

131 The heterogeneous conversion of NO<sub>2</sub> to HONO on the ground ( $P_{\text{ground}}$ ) and on the  
132 aerosol surface ( $P_{\text{aerosol}}$ ) was calculated based on parameters obtained from experiments  
133 or observations.

134

$$P_{\text{ground}} = \frac{1}{8} \gamma_1 \times [\text{NO}_2] \times C_{\text{NO}_2} \times \frac{S_g}{V} \quad (4)$$

135

$$P_{\text{aerosol}} = \frac{1}{4} \gamma_2 \times [\text{NO}_2] \times C_{\text{NO}_2} \times \frac{S_a}{V} \quad (5)$$

136

$$\frac{S_g}{V} = \frac{1}{\text{MLH}} \quad (6)$$

137

$$C_{\text{NO}_2} = \sqrt{\frac{8RT}{\pi M}} \quad (7)$$

138 where  $C_{\text{NO}_2}$  is the average molecular velocity of  $\text{NO}_2$  molecule ( $\text{m s}^{-1}$ );  $R$  is the ideal139 gas constant;  $T$  is the temperature (K);  $M$  is the molecular weight of  $\text{NO}_2$  ( $\text{kg mol}^{-1}$ );

140 MLH is the height of the mixed layer, which is determined to be 50 m due to HONO

141 formation on the ground level and its short lifetime (Liu et al., 2020b);  $S_a/V$  is the

142 surface area to volume ratio of aerosol, estimated by Su et al. (Su et al., 2008).

143 

### 4.3.2 Heterogeneous photo-enhanced reactions

144 The heterogeneous photo-enhanced reactions of  $\text{NO}_2$  on the surface of the ground145 ( $P_{\text{ground}+h\nu}$ ) and the surface of the aerosol ( $P_{\text{aerosol}+h\nu}$ ) were calculated following (Zhang

146 et al., 2020a):

147

$$P_{\text{ground}+h\nu} = \frac{1}{8} \times C_{\text{NO}_2} \times \frac{1}{\text{MLH}} \times \gamma_1 \times \frac{J_{\text{NO}_2}}{J_{\text{NO}_2,\text{noon}}} \times [\text{NO}_2] \quad (8)$$

148

$$P_{\text{aerosol}+h\nu} = \frac{1}{4} \times C_{\text{NO}_2} \times \frac{S_a}{V} \times \gamma_2 \times \frac{J_{\text{NO}_2}}{J_{\text{NO}_2,\text{noon}}} \times [\text{NO}_2] \quad (9)$$

149 where  $J_{\text{NO}_2}$  and  $J_{\text{NO}_2,\text{noon}}$  are the photolysis rate of  $\text{NO}_2$  and the photolysis rate of  $\text{NO}_2$ 

150 at noon during the day, respectively.

151  $\gamma_1$  and  $\gamma_2$  are the absorption coefficient of  $\text{NO}_2$  on the ground and aerosol surface,

152 respectively, which is assumed to be  $4 \times 10^{-6}$  (Yu et al., 2022; Zhang et al., 2021; Zhang  
 153 et al., 2020a). Moreover, we discuss the uncertainties based on the recommended values  
 154 of  $2 \times 10^{-6}$ – $1 \times 10^{-5}$  as upper and lower bounds (Chen et al., 2023; VandenBoer et al.,  
 155 2013; Wong et al., 2011). Results show (Figure S3) that the uncertainties for  $P_{\text{ground}}$ ,  
 156  $P_{\text{aerosol}}$ ,  $P_{\text{ground+hv}}$ , and  $P_{\text{aerosol+hv}}$  are  $-50\%$  to  $150\%$ ,  $-50\%$  to  $151\%$ ,  $-20\%$  to  $120\%$ , and  
 157  $-50\%$  to  $121\%$  at the U-ZK, respectively. At the R-PY, the uncertainties for  $P_{\text{ground}}$ ,  
 158  $P_{\text{aerosol}}$ ,  $P_{\text{ground+hv}}$ , and  $P_{\text{aerosol+hv}}$  are  $-50\%$  to  $150\%$ ,  $-50\%$  to  $151\%$ ,  $-20\%$  to  $120\%$ , and  
 159  $-50\%$  to  $121\%$ , respectively.

#### 160 4.4 Nitrate photolysis

161 The nitrate photolysis ( $P_{\text{nitrate}}$ ) was calculated based on the measured nitrate  
 162 concentration ( $\text{NO}_3^-$ ) from  $\text{PM}_{2.5}$  and nitrate photolysis rate ( $J_{\text{nitrate} \rightarrow \text{HONO}}$ ):

$$163 \quad P_{\text{nitrate}} = J_{\text{nitrate} \rightarrow \text{HONO}} \times [\text{NO}_3^-] \quad (10)$$

164 where the  $J_{\text{nitrate} \rightarrow \text{HONO}}$  was simulated by normalizing UV values, when the Zenit Angle  
 165 is  $0^\circ$ ,  $J_{\text{nitrate} \rightarrow \text{HONO}}$  varied within the range of  $1.22 \times 10^{-5}$  to  $4.84 \times 10^{-4} \text{ s}^{-1}$ , with an average  
 166 value of  $8.24 \times 10^{-5} \text{ s}^{-1}$  (Bao et al., 2018).

#### 167 Text S5 Estimation of HONO formation rate

168 The redox reaction of  $\text{NO}_2$  with  $\text{SO}_2$  ( $\text{R}_1$ ) is considered a crucial potential source of  
 169 high concentrations of HONO in Northern China (Wang et al., 2016b; Cheng, 2016):

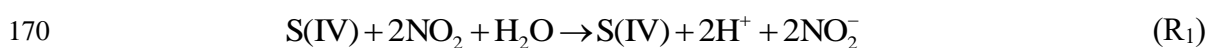

171 The rate expression for the reaction was estimated to:

$$172 \quad d[\text{S(VI)}]/dt = k_1[\text{NO}_2][\text{S(VI)}], \quad (11)$$

173 where the  $k_1 = (1.4 \times 10^5 + 1.24 \times 10^7)/2 \text{ M}^{-1}\text{s}^{-1}$  for the pH range  $< 5$ ;

174  $k_1 = (23.25 \times (\text{pH} - 5) + 1.4 + 124)/2 \times 10^5 \text{ M}^{-1}\text{s}^{-1}$  for the pH range  $5 < \text{pH} < 5.3$ ;

175  $k_1 = (23.25 \times (\text{pH} - 5) + 1.4 + 12.6 \times (\text{pH} - 5.3) + 124)/2 \times 10^5 \text{ M}^{-1}\text{s}^{-1}$  for the pH range  $5.3 <$

176  $\text{pH} < 5.8$ ;

177  $k_1 = (12.6 \times (\text{pH} - 5.3) + 124 + 20)/2 \times 10^5 \text{ M}^{-1}\text{s}^{-1}$  for the pH range  $5.8 < \text{pH} < 8.7$ ;

178 and  $k_1 = (2 \times 10^6 + 1.67 \times 10^7)/2 \text{ M}^{-1}\text{s}^{-1}$  for the pH range  $\text{pH} > 8.7$ . (Seinfeld et al., 1998)

179 In the above calculation formulas, the concentration of gas in the liquid is determined

180 by Henry's constant ( $H^*$ ). The calculation formula is in Table S4.  $\text{SO}_2$  has a dissociation

181 equilibrium in the solution, producing  $\text{HSO}_3^-$  and  $\text{SO}_3^{2-}$ . The ionization constants ( $K$ )

182 are shown in the following Table S5. The  $H^*$  and  $K$  are temperature-dependent. The

183 values are given in Tables S4 and S5 under the condition of 298K, converted to the

184 value under the actual temperature using the following calculation formula:

$$185 \quad H(T) \text{ or } K(T) = H(T_{298\text{K}}) \text{ or } K(T_{298\text{K}}) \exp \left[ -\frac{\Delta H_{298\text{K}}}{R} \left( \frac{1}{T} - \frac{1}{298\text{K}} \right) \right] \quad (12)$$

186 where  $H(T)$ 、 $K(T)$ 、 $H(T_{298\text{K}})$ , and  $K(T_{298\text{K}})$  represent the  $H^*$  and  $K$  at actual temperature

187 and 298 K, respectively.

188 Influences of ionic strength on  $R_1$  were not considered because of the high values

189 predicted by the ISORROPIA-II model during the sampling periods (Cheng et al.,

190 2016). To evaluate the effects of mass transport, the formulation of a standard resistance

191 model was adopted:



192 
$$\frac{1}{R_{H, \text{aq}}} = \frac{1}{R_{\text{aq}}} + \frac{1}{J_{\text{aq}, \text{lim}}} \quad (13)$$

193 where  $R_{H, \text{aq}}$  is the sulfate production rate,  $R_{\text{aq}}$  is the aqueous-phase reaction rate and  
 194  $J_{\text{aq}, \text{lim}}$  is the limiting mass transfer rate. which could be calculated by the formulas as  
 195 follows:

196 
$$J_{\text{aq}, \text{lim}} = \min\{J_{\text{aq}}(\text{SO}_2), J_{\text{aq}}(\text{X})\} \quad (14)$$

197 
$$J_{\text{aq}}(\text{X}) = k_{\text{MT}}(\text{X}) \cdot [\text{X}] \quad (15)$$

198 where  $[\text{X}]$  refers to the aqueous-phase concentrations of  $\text{SO}_2$  or the oxidants  $\text{O}_{\text{xi}}$   
 199 calculated by the equation in Table S4. The mass transfer rate coefficient  $k_{\text{MT}}(\text{X})$  ( $\text{s}^{-1}$ )  
 200 can be calculated by:

201 
$$k_{\text{MT}} = \left[ \frac{R_p^2}{3D_g} + \frac{4R_p}{3\alpha v} \right]^{-1} \quad (16)$$

202 where  $R_p$  is the aerosol radius,  $D_g$  is the gas-phase molecular diffusion coefficient ( $0.2$   
 203  $\text{cm}^2 \text{ s}^{-1}$  at  $293\text{K}$ ),  $v$  is the mean molecular speed of  $\text{X}$  ( $3 \times 10^4 \text{ cm s}^{-1}$ ), and  $\alpha$  is the mass  
 204 accommodation of  $\text{X}$  on the droplet surface, and we adopted values of  $0.11$  and  $2\text{E}^{-4}$  for  
 205  $\text{SO}_2$  and  $\text{NO}_2$ , respectively referring to Cheng et al. (Cheng, 2016).

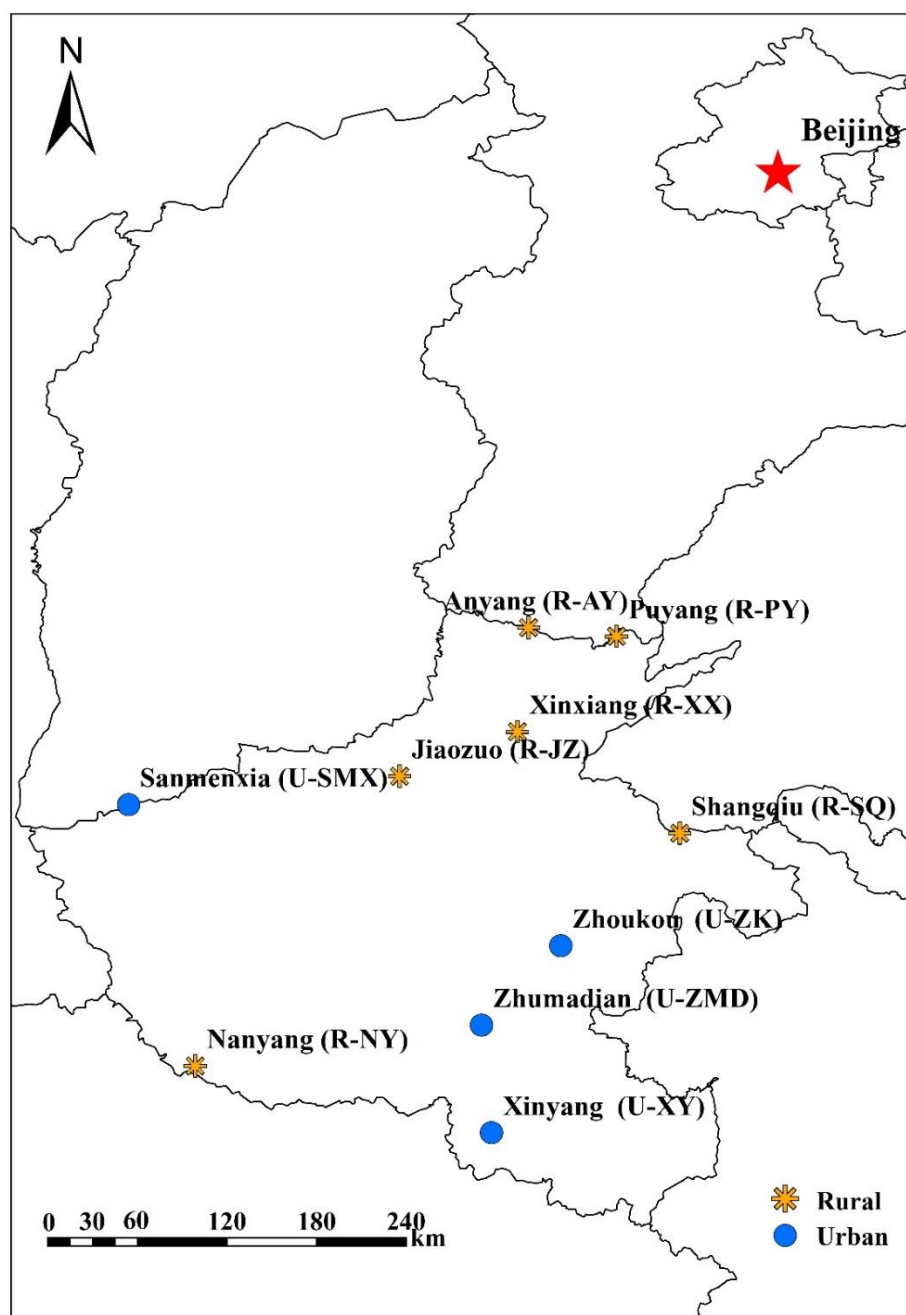

207

208 Figure S1. Sampling point map in Henan Province, China. © 2019 National Geomatics

209 Center of China. i.e., urban sites at Sanmenxia (U-SMX), Zhoukou (U-ZK), Zhuamdian

210 (U-ZMD) and Xinyang (U-XY), rural sites at Anyang (R-AY), Xinxiang (R-XX),

211 Puyang (R-PY), Jiaozuo(R-JZ), Shangqiu (R-SQ) and Nanyang (R-NY). All rights

212 reserved.

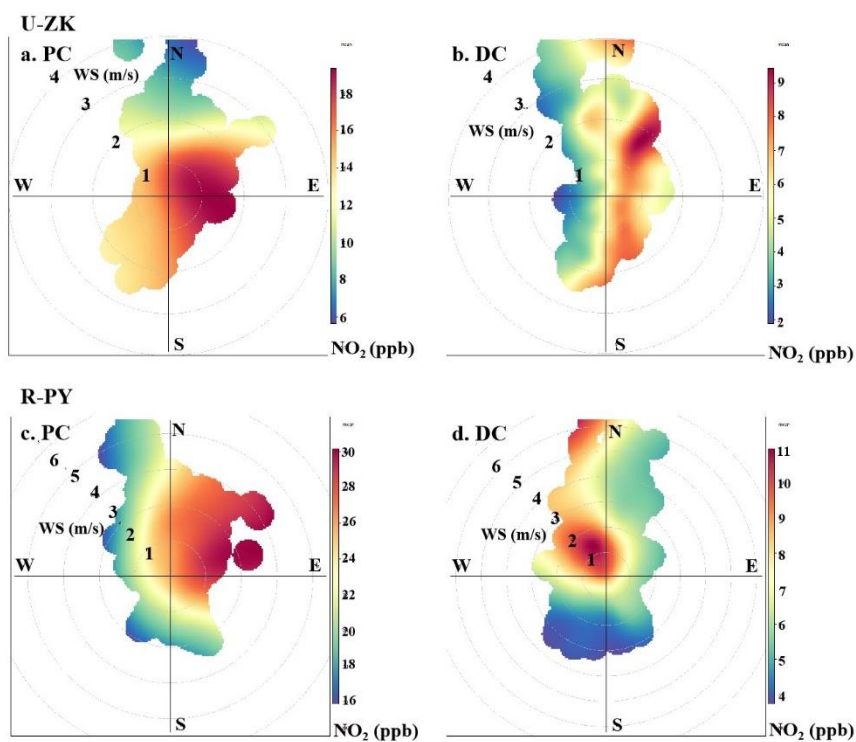

214

215 **Figure S2. Result of conditional bivariate probability function plots: NO<sub>2</sub> at U-ZK and**216 **R-PY sites before (PC) and during (DC) the COVID-19 outbreak. The color scale bar**217 **represents NO<sub>2</sub> concentration.**

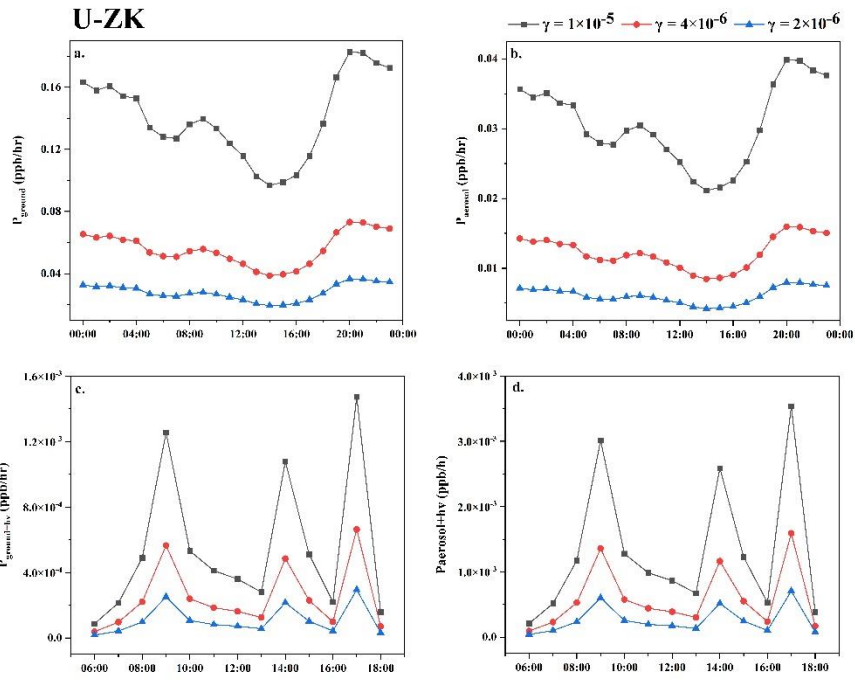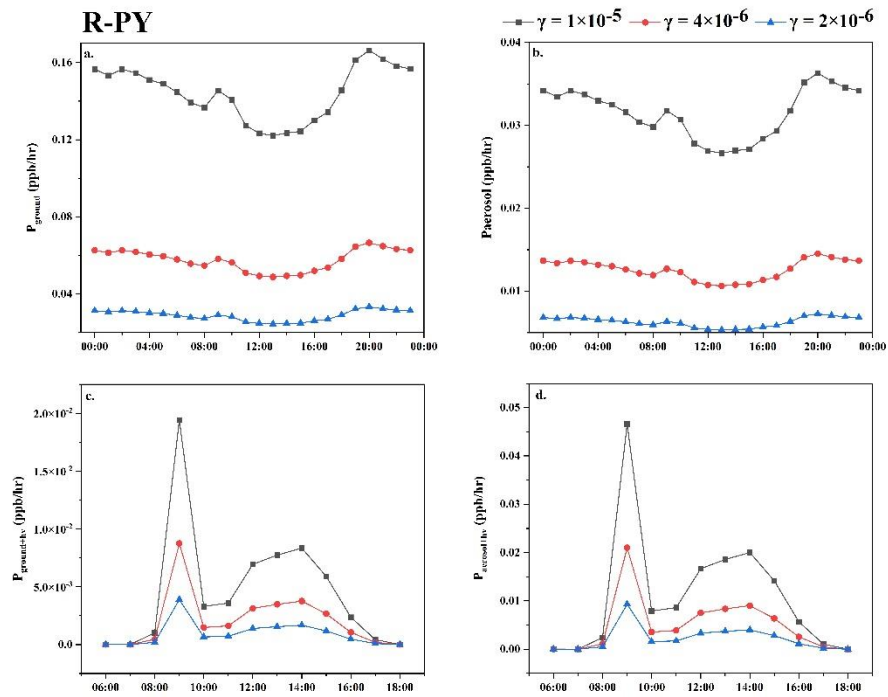

218

219

220 **Figure S3. HONO production rate using different uptake rates of NO<sub>2</sub> at the U-ZK**

221 **and R-PY sites before (PC) and during (DC) the COVID-19 outbreak. (a)P<sub>ground</sub>, (b)**

222 **P<sub>aerosol</sub>, (c) P<sub>ground+hv</sub>, and (d) P<sub>aerosol+hv</sub>**

223

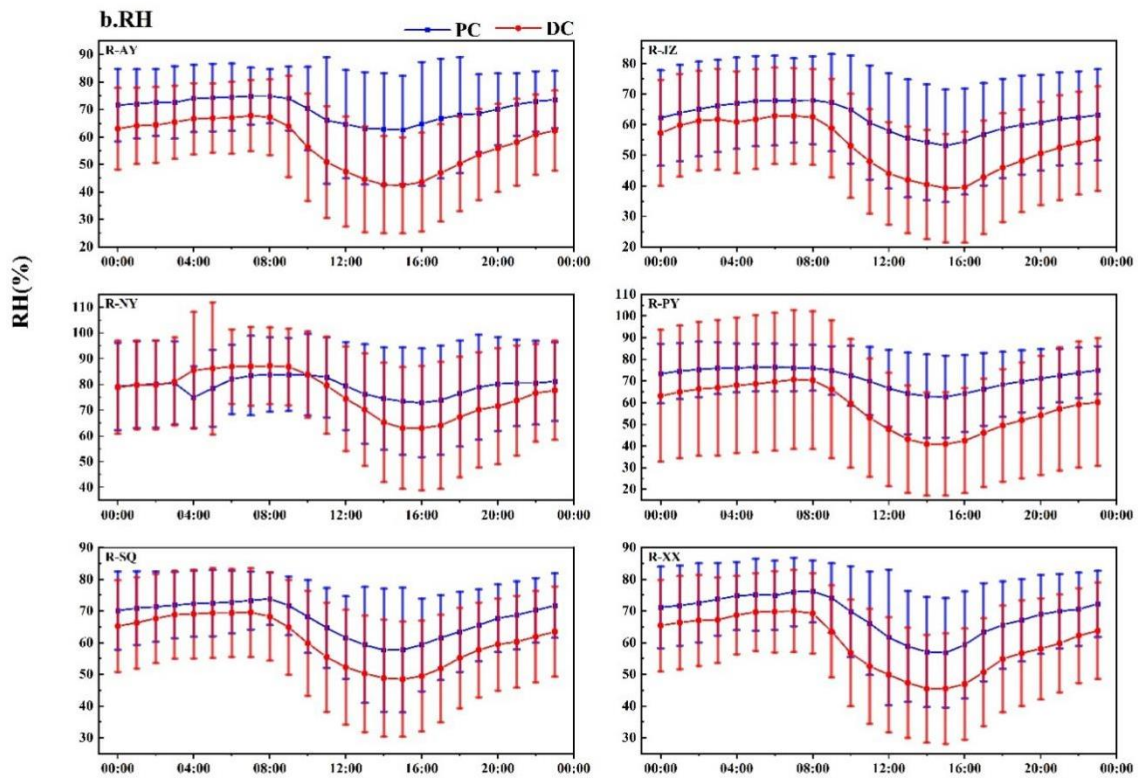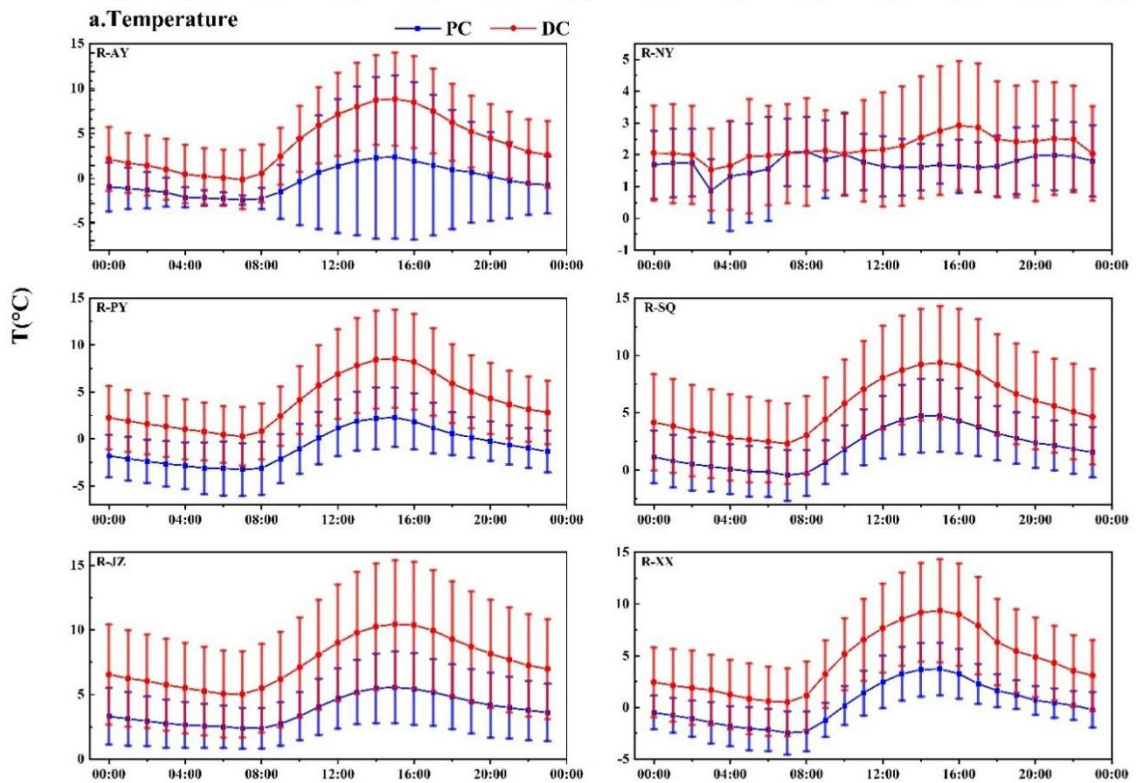

227 Figure S4. Daily changes in temperature and relative humidity (RH) in rural sites  
 228 before (PC) and during (DC) the COVID-19 outbreak, the error bar represents the  
 229 standard deviation. The upper and lower whiskers represent the standard deviation.

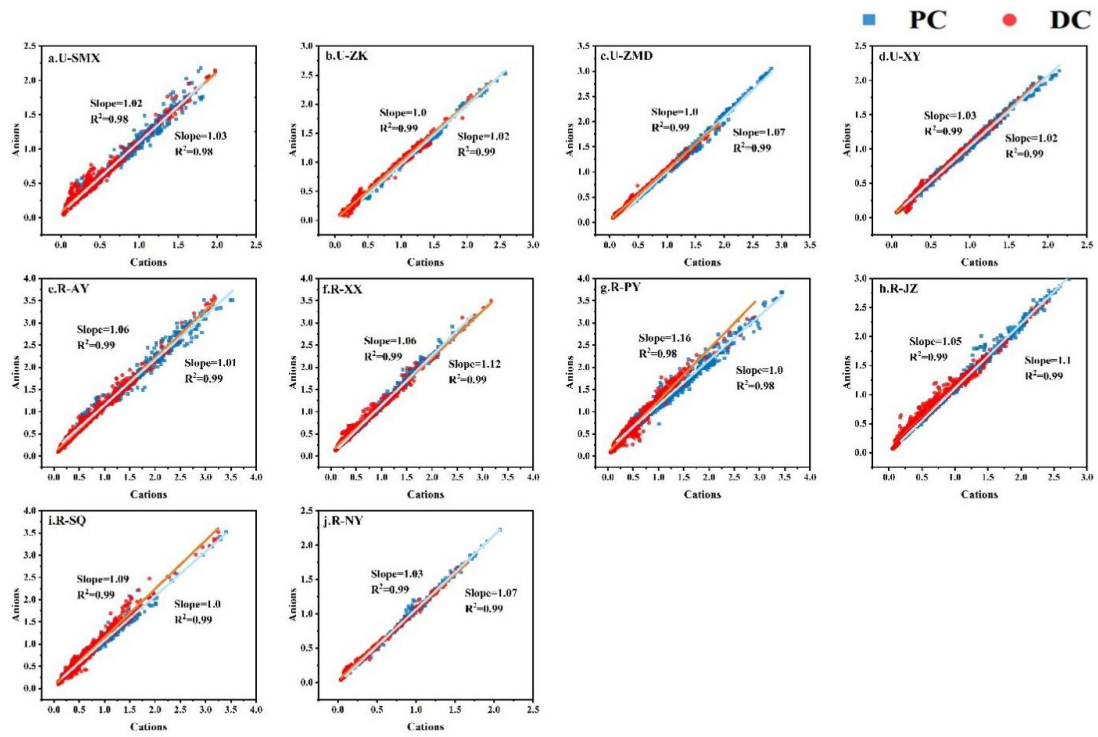

230

231 Figure S5. The equilibrium state of anions and cations at ten sites before (PC) and

232 during (DC) the COVID-19 outbreak.

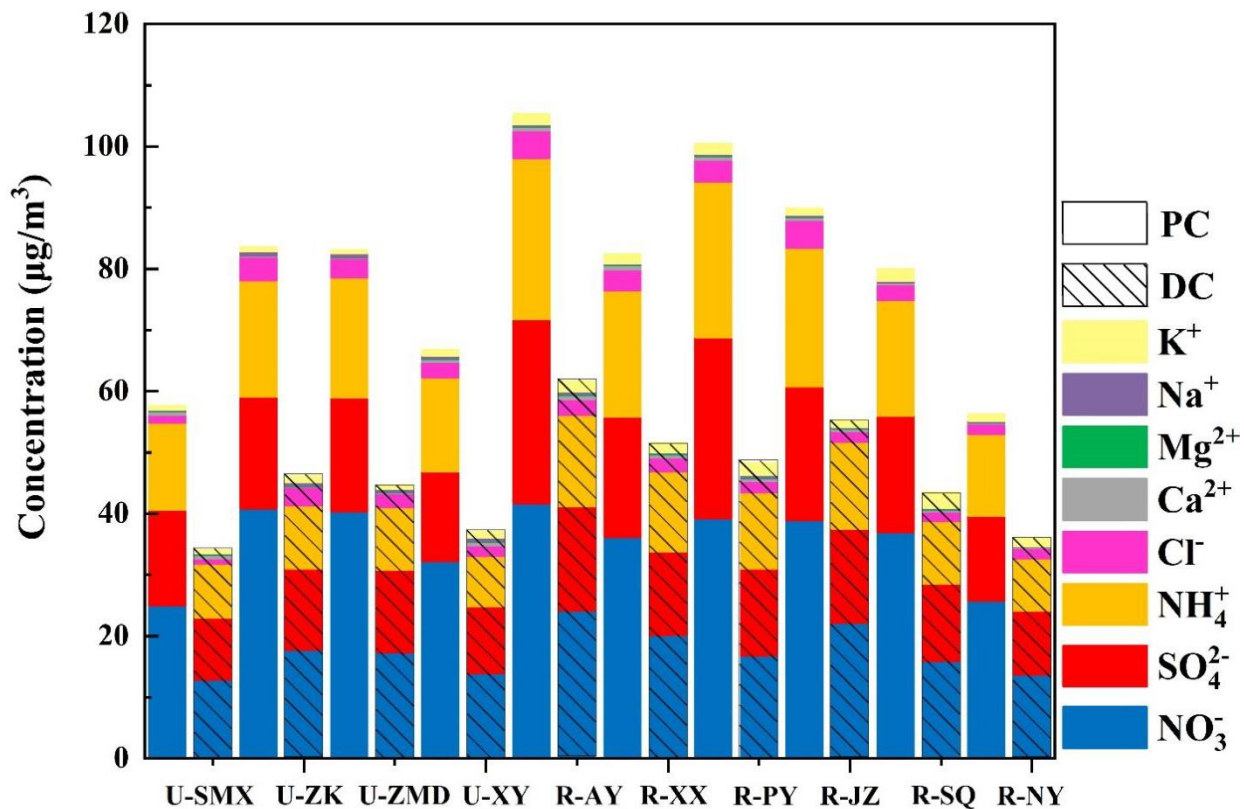

233

234 Figure S6. Concentrations of the water-soluble ions at the ten sites before (PC) and

235 during (DC) the COVID-19 outbreak.



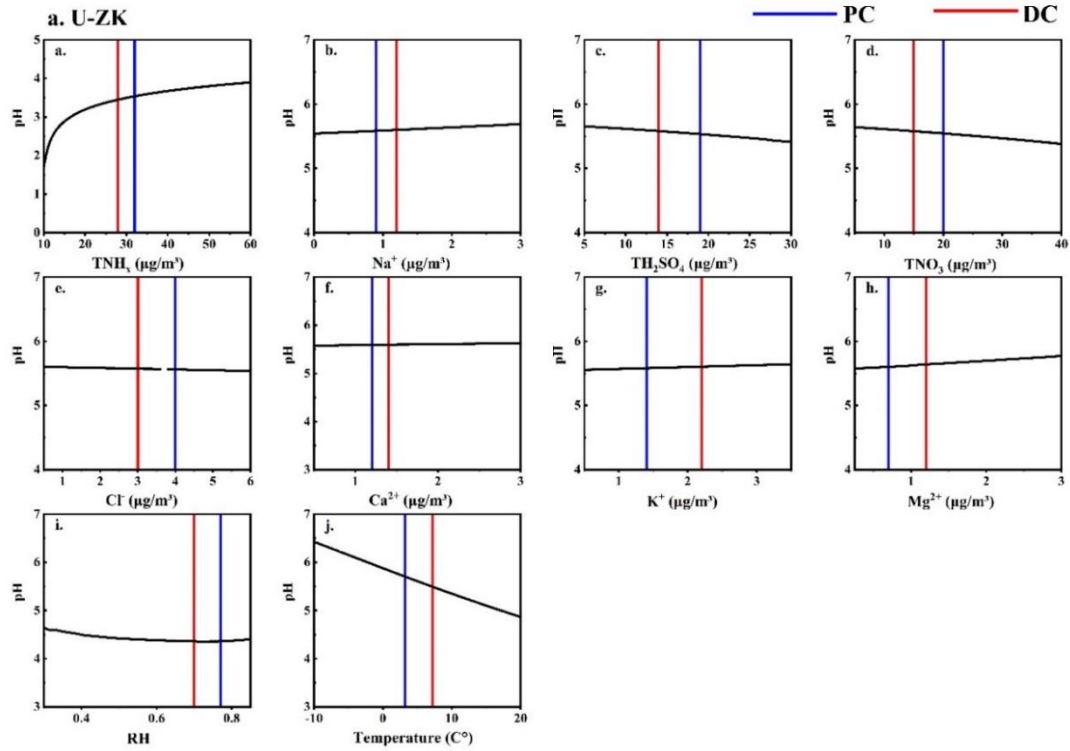

236

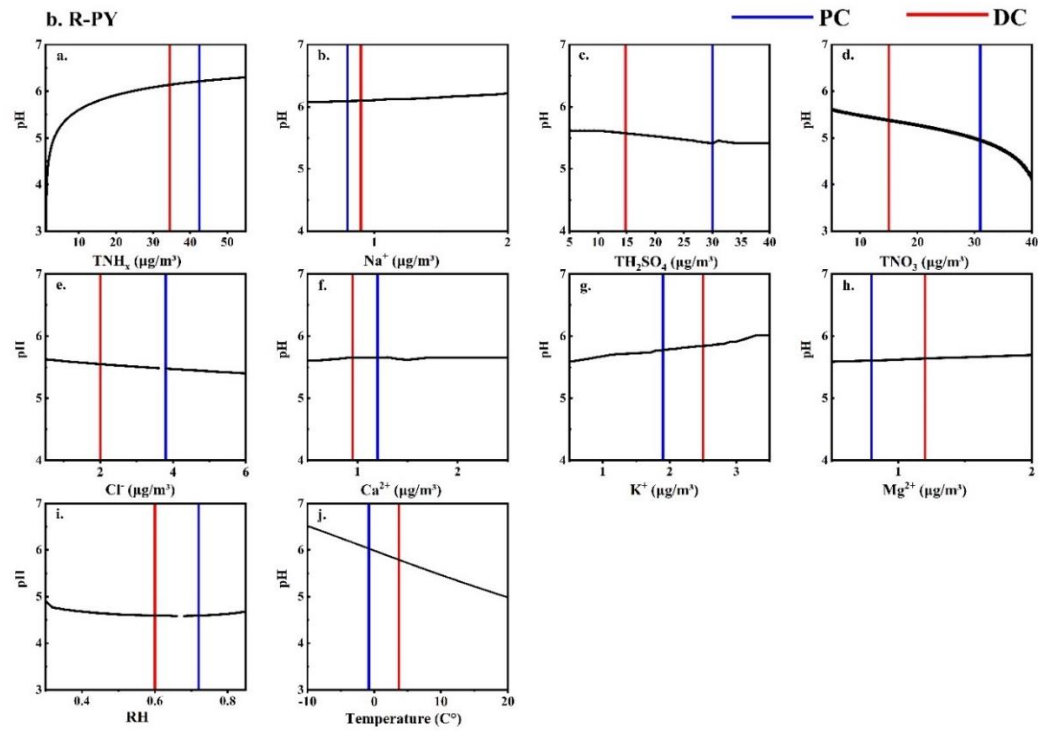

237

238 Figure S7. Sensitivity tests of pH to each factor. The vertical bar represents the mean  
 239 values before (PC) and during (DC) the COVID-19 outbreak. A given range for a  
 240 variable (i.e.,  $TNH_x$ ) with corresponding average values of other parameters (i.e.,  
 241  $TH_2SO_4$ ,  $TNO_3$ ,  $TCl$ ,  $TNa$ ,  $K^+$ ,  $Ca^{2+}$ ,  $Mg^{2+}$ ,  $T$ , and  $RH$ ) was simulated to compare its  
 242 effects on pH.



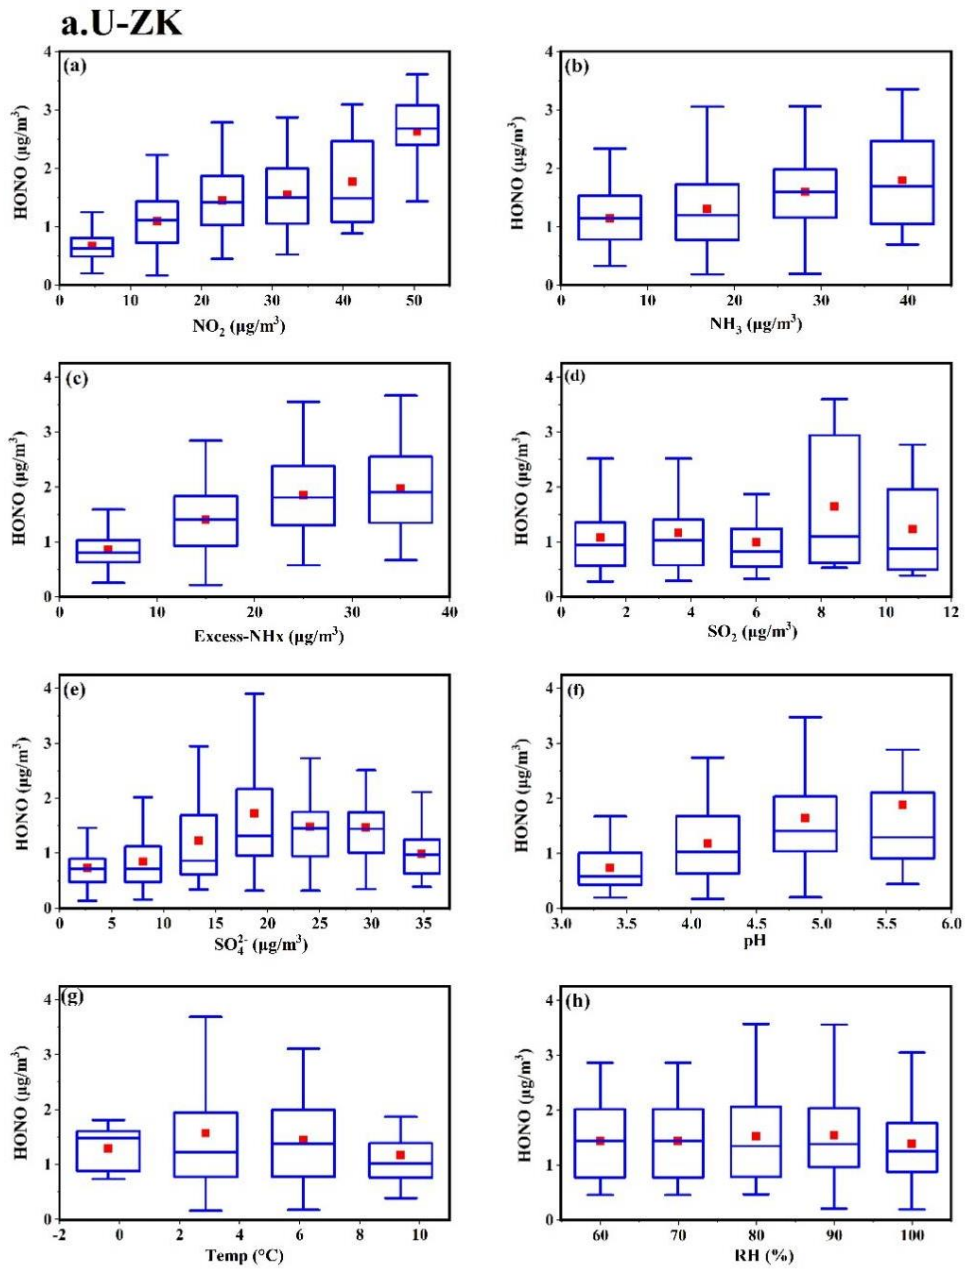

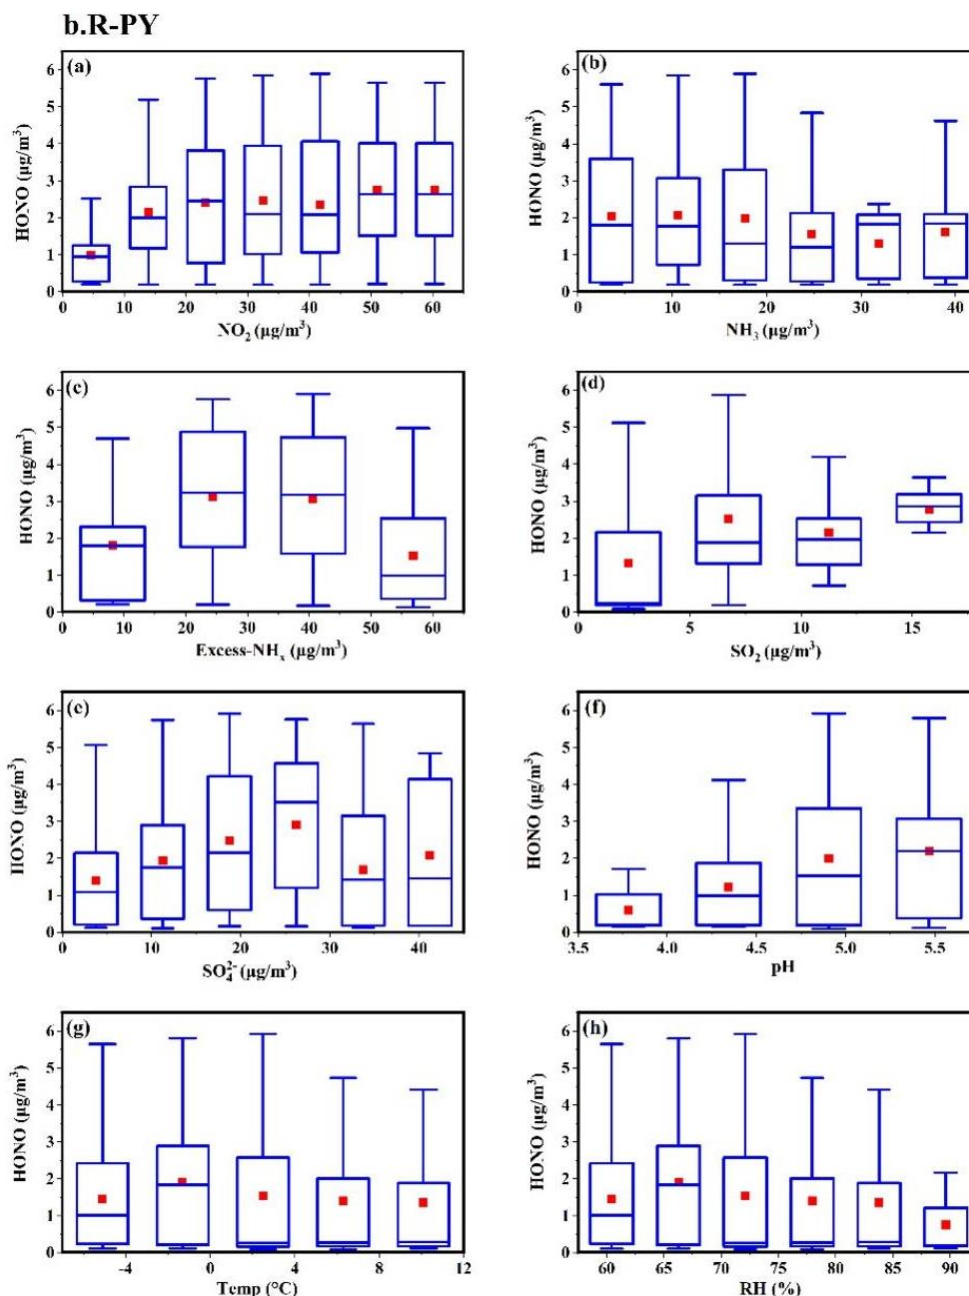

245

246 Figure S8. Relationship between HONO and main influencing factors during (DC) the

247 COVID-19 outbreak at U-ZK and R-PY sites. In each box, the top, middle, and bottom

248 lines represent the 75, 50, and 25 percentiles of statistical data, respectively; the upper

249 and lower whiskers represent the 90 and 10 percentiles of statistical data, respectively.

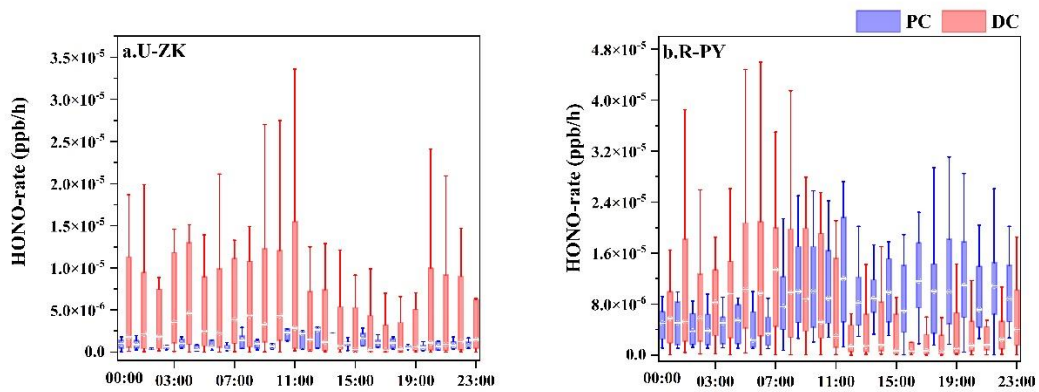

250

251 Figure. S9. HONO production rate through  $R_1$  at U-ZK and R-PY sites before (PC) and

252 during (DC) the COVID-19 outbreak. In each box, the top, middle, and bottom lines

253 represent the 75, 50, and 25 percentiles of statistical data, respectively; the upper and

254 lower whiskers represent the 90 and 10 percentiles of statistical data, respectively.

255

256

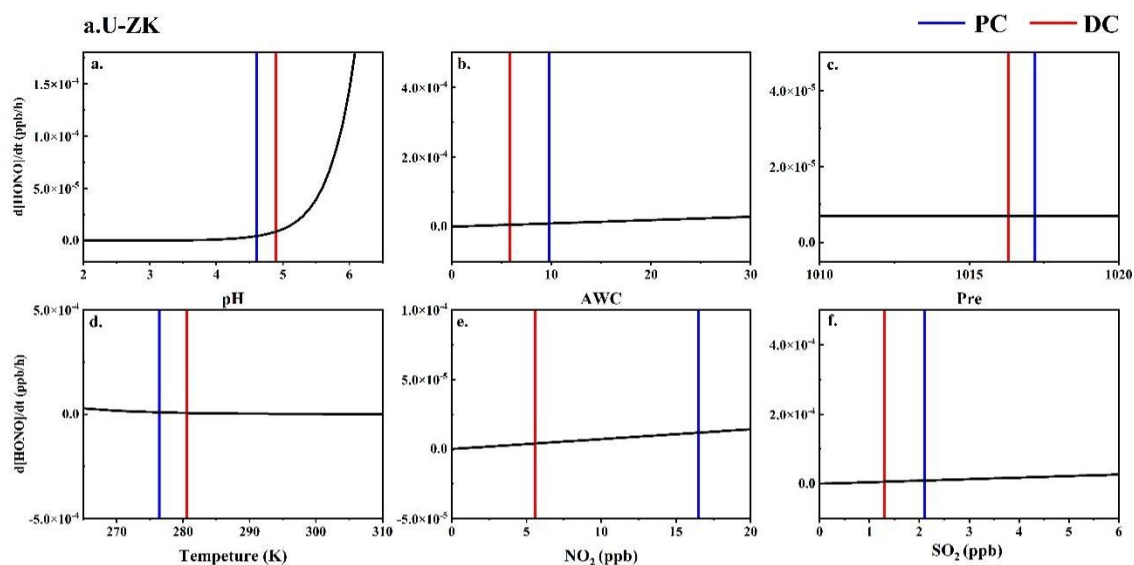

257

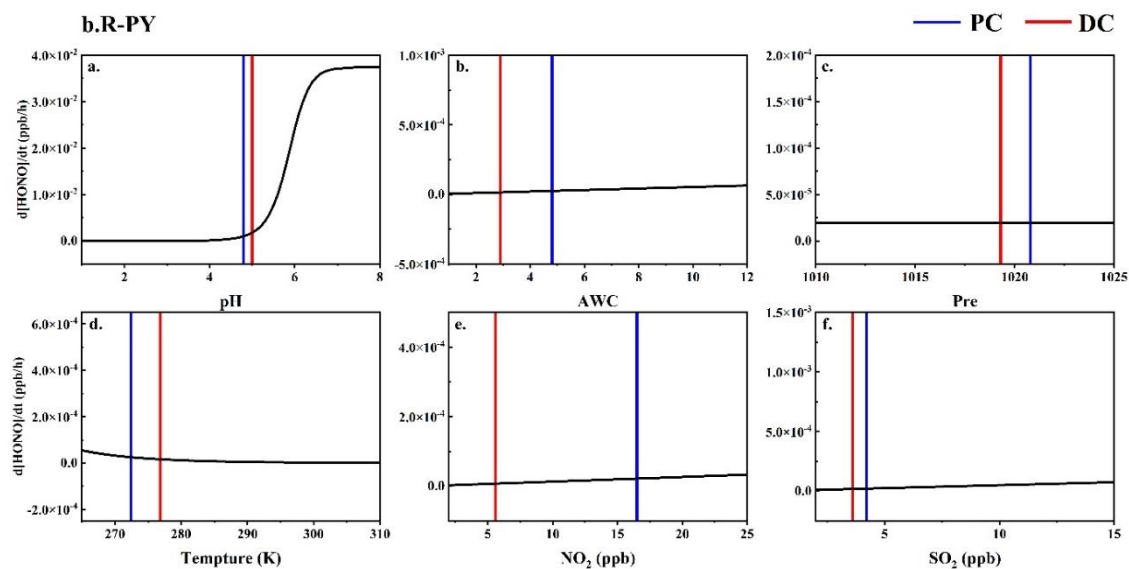

258

259 Figure S10. Sensitivity of HONO product rate to each factor. The vertical bar represents  
 260 the mean values before (PC) and during (DC) the COVID-19 outbreak. The real-time  
 261 measured values of a variable and the average values of other parameters were input  
 262 into the production rate of the  $R_1$  reaction.

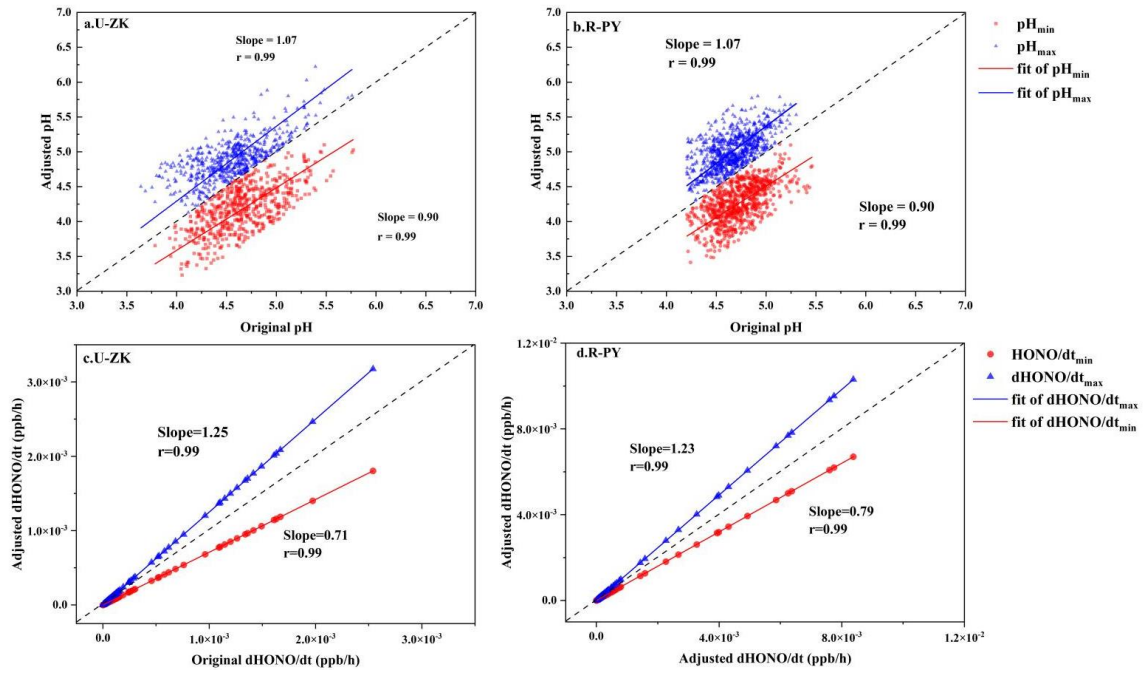

263

264 Figure S11. pH and  $R_1$  uncertainties at the U-ZK and R-PY sites are based on two  
 265 extreme scenarios of sensitivity to measurement uncertainty.

266

267 **Tables**

268

269

270

271

Table S1. Descriptions of the ten sampling sites in Henan Province, China.

| Observation sites | Classifications | Abbreviations | Coordinates         | Locations                                                                | Surrounding environment                  |
|-------------------|-----------------|---------------|---------------------|--------------------------------------------------------------------------|------------------------------------------|
| Sanmenxia         | Urban site      | U-SMX         | 34.79 °N, 111.16 °E | Sanmenxia Environmental Protection Bureau                                | Roads, residential areas                 |
| Zhoukou           | Urban site      | U-ZK          | 33.65° N, 114.65° E | Chuanhui District People's Government                                    | Roads, residential areas                 |
| Zhumadian         | Urban site      | U-ZMD         | 33.01° N, 114.01° E | Huanghuai College                                                        | Roads, residential areas, shopping malls |
| Xinyang           | Urban site      | U-XY          | 32.14° N, 114.09° E | Xinyang Museum                                                           | Roads, residential areas, shopping malls |
| Anyang            | Rural site      | R-AY          | 36.22°N, 114.39° E  | Baizhuang Town Xindian North Street China Resources Gas (Andan Station)  | Highways, villages, farmland             |
| Xinxiang          | Rural site      | R-XX          | 35.38° N, 114.30° E | Banzao Township Central School in Yanjin County                          | Villages, farmland                       |
| Puyang            | Rural site      | R-PY          | 36.15° N, 115.10° E | Nanle County Longwang Temple Station                                     | Villages, farmland                       |
| Jiaozuo           | Rural site      | R-JZ          | 35.02° N, 113.35° E | The Second River Bureau of Jiefeng Village, Beiguo Township, Wuxi County | Villages, farmland                       |
| Shangqiu          | Rural site      | R-SQ          | 34.56° N, 115.61° E | Liangyuan Huanghe Gudao National Forest Park                             | Highways, villages, farmland             |
| Nanyang           | Rural site      | R-NY          | 32.68° N, 111.70° E | Nanyang Tangshan Park                                                    | Villages, farmland                       |

272

273

Table S2. The value of  $\rho_s$  in other studies.

| Observation site | Period       | $\rho_s$ (g/cm <sup>3</sup> ) | Reference                  |
|------------------|--------------|-------------------------------|----------------------------|
| Beijing          | Dec 2016     | 1.4                           | (Liu et al., 2017)         |
| Tianjin          | Dec-Jun 2015 | 1.3                           | (Shi et al., 2017)         |
| Xi'an            | Nov-Dec 2012 | 1.4                           | (Guo et al., 2017)         |
| Hohhot           | Winter 2015  | 1.35                          | (Wang et al., 2019)        |
| Northeastern USA | Feb-Mar 2015 | 1.4                           | (Guo et al., 2016)         |
| Crete, Greece    | Aug-Nov 2012 | 1.35                          | (Bougiatioti et al., 2016) |
| Alabama, USA     | Jun-Jul 2013 | 1.4                           | (Guo et al., 2015)         |
| Georgia, USA     | Aug-Oct 2016 | 1.4                           | (Nah et al., 2018)         |

274

275

Table S3. Summary of vehicle emission factors.

| Observation site | Period | Emission factor (%) | Reference                     |
|------------------|--------|---------------------|-------------------------------|
| Beijing          | 2020   | 0.79                | (Meng et al., 2020)           |
| Hong Kong        | 2015   | 0.4–1.8             | (Yun et al., 2017)            |
| Hong Kong        | 2011   | 0.5–1.6             | (Xu et al., 2015)             |
| Kiesberg Tunnel  | 2001   | 0.8                 | (Kleffmann et al., 2003)      |
| Kiesberg Tunnel  | 1997   | 0.3–0.8             | (Kurtenbach and Wiesen, 2001) |
| Guangzhou        | 2019   | 1.31                | (Li et al., 2021b)            |

276

277

Table S4. Constants for calculating the apparent Henry's constant ( $H^*$ ).

| Equilibrium                                | H (M atm <sup>-1</sup> ) at 298K | $-\Delta H_{298K}/R$ (K) |
|--------------------------------------------|----------------------------------|--------------------------|
| SO <sub>2</sub> (g) ↔ SO <sub>2</sub> (aq) | 1.23                             | 3145.3                   |
| NO <sub>2</sub> (g) ↔ NO <sub>2</sub> (aq) | 1.00E-02                         | 2516.2                   |

278

279

Table S5. Constants for calculating the ionization constants (K).

| Equilibrium                                                                        | K (M) at 298K | $-\Delta H_{298K}/R$ (K) |
|------------------------------------------------------------------------------------|---------------|--------------------------|
| SO <sub>2</sub> ·H <sub>2</sub> O ↔ H <sup>+</sup> + HSO <sub>3</sub> <sup>-</sup> | 1.30E-02      | 1960                     |
| HSO <sub>3</sub> <sup>-</sup> ↔ H <sup>+</sup> + SO <sub>3</sub> <sup>2-</sup>     | 6.60E-08      | 1500                     |

280

281 Table S6. Comparisons of NH<sub>3</sub> concentrations (mean ± standard deviation) (µg/m<sup>3</sup>)  
 282 from studies in other cities.

| Sampling sites      | Seasons | Years         | NH <sub>3</sub><br>(µg/m <sup>3</sup> ) | Sites | References                |
|---------------------|---------|---------------|-----------------------------------------|-------|---------------------------|
| Delhi, India        | Winter  | 2013–<br>2015 | 19.2 ± 3.5                              | Urban | (Saraswati et al., 2019)  |
| Osaka, Japan        | Winter  | 2015          | 1.5 ± 0.7                               | Urban | (Huy et al., 2017)        |
| Toronto, Canada     | Winter  | 2007          | 0.8 ± 0.5                               | Urban | (Hu et al., 2014)         |
| Kanpur, India       | Winter  | 2007          | 21.7 ± 5.8                              | Urban | (Behera and Sharma, 2010) |
| Nanjing             | Winter  | 2014          | 6.7                                     | Urban | (Wang et al., 2016b)      |
| Yangtze River Delta | Winter  | 2019          | 9.3 ± 4.0                               | Urban | (Wang et al., 2021)       |
| Shanghai            | Winter  | 2014          | 2.8 ± 1.0                               | Urban | (Wang et al., 2018b)      |
| Tianjin             | Winter  | 2015          | 12.0                                    | Urban | (Shi et al., 2019)        |
| Xi'an               | Winter  | 2012          | 17.5 ± 9.1                              | Urban | (Wang et al., 2016a)      |
| Fujian              | Winter  | 2016          | 12.8 ± 4.8                              | Urban | (Wu et al., 2017)         |
| Beijing             | Winter  | 2015          | 15.1 ± 2.9                              | Urban | (Wang et al., 2016a)      |
| Beijing             | Winter  | 2017          | 13.1 ± 1.6                              | Urban | (Zhang et al., 2020b)     |
| Beijing             | Winter  | 2020          | 19.9 ± 3.8                              | Urban | (Zhang et al., 2020b)     |
| Taoyuan             | Winter  | 2017–<br>2018 | 1.7 ± 1.9                               | Urban | (Duan et al., 2021)       |
| Zhengzhou           | Winter  | 2018          | 19.0 ± 4.0                              | Rural | (Wang et al., 2020)       |
| Quzhou              | Winter  | 2019          | 29.5 ± 2.2                              | Rural | (Feng et al., 2022)       |
| Gucheng             | Winter  | 2016          | 9.3                                     | Rural | (Xu et al., 2019)         |
| Chongming           | Winter  | 2019–<br>2020 | 9.3 ± 4.0                               | Rural | (Lv et al., 2022)         |
| Shanglan            | Winter  | 2017–<br>2018 | 2.5 ± 2.6                               | Rural | (Duan et al., 2021)       |

283



284

285 Table S7. The concentration (mean  $\pm$  standard deviation) of relative humidity (RH),  
 286 temperature (T),  $\epsilon(\text{NH}_4^+)$  at the ten sites before (PC) and during (DC) the COVID-19  
 287 outbreak.

| Sites | Substances                | Total           | PC              | DC              |
|-------|---------------------------|-----------------|-----------------|-----------------|
| U-SMX | RH (%)                    | 54.8 $\pm$ 18.0 | 60.6 $\pm$ 16.5 | 51.2 $\pm$ 18.0 |
|       | T ( $^{\circ}\text{C}$ )  | 5.6 $\pm$ 4.2   | 3.1 $\pm$ 2.1   | 7.0 $\pm$ 4.4   |
|       | $\epsilon(\text{NH}_4^+)$ | 0.43 $\pm$ 0.20 | 0.54 $\pm$ 0.18 | 0.36 $\pm$ 0.18 |
| U-ZK  | RH (%)                    | 70.1 $\pm$ 21.9 | 73.6 $\pm$ 14.5 | 69.4 $\pm$ 22.4 |
|       | T ( $^{\circ}\text{C}$ )  | 6.4 $\pm$ 4.3   | 3.8 $\pm$ 2.3   | 7.0 $\pm$ 4.5   |
|       | $\epsilon(\text{NH}_4^+)$ | 0.43 $\pm$ 0.20 | 0.59 $\pm$ 0.14 | 0.32 $\pm$ 0.17 |
| U-ZMD | RH (%)                    | 74.9 $\pm$ 23.3 | 84.4 $\pm$ 17.8 | 68.9 $\pm$ 24.4 |
|       | T ( $^{\circ}\text{C}$ )  | 5.6 $\pm$ 4.6   | 2.9 $\pm$ 2.7   | 7.4 $\pm$ 4.8   |
|       | $\epsilon(\text{NH}_4^+)$ | 0.48 $\pm$ 0.21 | 0.62 $\pm$ 0.17 | 0.38 $\pm$ 0.18 |
| U-XY  | RH (%)                    | 77.0 $\pm$ 22.1 | 86.7 $\pm$ 13.3 | 74.3 $\pm$ 23.3 |
|       | T ( $^{\circ}\text{C}$ )  | 7.7 $\pm$ 4.5   | 4.7 $\pm$ 2.2   | 8.5 $\pm$ 4.6   |
|       | $\epsilon(\text{NH}_4^+)$ | 0.55 $\pm$ 0.21 | 0.71 $\pm$ 0.14 | 0.45 $\pm$ 0.18 |
| R-AY  | RH (%)                    | 62.2 $\pm$ 17.9 | 70.1 $\pm$ 14.9 | 57.2 $\pm$ 17.8 |
|       | T ( $^{\circ}\text{C}$ )  | 2.6 $\pm$ 0.9   | -0.2 $\pm$ 2.5  | 4.4 $\pm$ 4.7   |
|       | $\epsilon(\text{NH}_4^+)$ | 0.46 $\pm$ 0.17 | 0.57 $\pm$ 0.15 | 0.39 $\pm$ 0.14 |
| R-XX  | RH (%)                    | 63.0 $\pm$ 17.0 | 68.7 $\pm$ 14.6 | 59.5 $\pm$ 17.5 |
|       | T ( $^{\circ}\text{C}$ )  | 2.9 $\pm$ 4.6   | 0.3 $\pm$ 2.8   | 4.4 $\pm$ 4.8   |
|       | $\epsilon(\text{NH}_4^+)$ | 0.40 $\pm$ 0.17 | 0.52 $\pm$ 0.16 | 0.35 $\pm$ 0.14 |
| R-PY  | RH (%)                    | 63.6 $\pm$ 18.0 | 71.5 $\pm$ 14.6 | 57.6 $\pm$ 18.0 |
|       | T ( $^{\circ}\text{C}$ )  | 1.7 $\pm$ 4.8   | -0.8 $\pm$ 3.2  | 3.6 $\pm$ 4.9   |
|       | $\epsilon(\text{NH}_4^+)$ | 0.43 $\pm$ 0.17 | 0.58 $\pm$ 0.13 | 0.34 $\pm$ 0.13 |
| R-JZ  | RH (%)                    | 56.3 $\pm$ 18.5 | 62.0 $\pm$ 16.7 | 52.8 $\pm$ 18.7 |
|       | T ( $^{\circ}\text{C}$ )  | 4.1 $\pm$ 4.4   | 1.7 $\pm$ 2.6   | 5.6 $\pm$ 4.7   |
|       | $\epsilon(\text{NH}_4^+)$ | 0.37 $\pm$ 0.14 | 0.46 $\pm$ 0.13 | 0.32 $\pm$ 0.13 |
| R-SQ  | RH (%)                    | 63.2 $\pm$ 15.6 | 67.5 $\pm$ 12.6 | 60.5 $\pm$ 17.0 |
|       | T ( $^{\circ}\text{C}$ )  | 4.2 $\pm$ 4.5   | 2.0 $\pm$ 2.9   | 5.6 $\pm$ 4.7   |
|       | $\epsilon(\text{NH}_4^+)$ | 0.45 $\pm$ 0.19 | 0.63 $\pm$ 0.12 | 0.35 $\pm$ 0.14 |
| R-NY  | RH (%)                    | 75.9 $\pm$ 19.1 | 79.3 $\pm$ 17.7 | 73.9 $\pm$ 19.6 |
|       | T ( $^{\circ}\text{C}$ )  | 5.7 $\pm$ 3.8   | 3.6 $\pm$ 2.6   | 6.9 $\pm$ 3.9   |
|       | $\epsilon(\text{NH}_4^+)$ | 0.59 $\pm$ 0.19 | 0.73 $\pm$ 0.12 | 0.52 $\pm$ 0.18 |

288

289 Table S8. The concentration (mean  $\pm$  standard deviation) of required ammonia  
 290 (Required-NH<sub>x</sub>) and excess ammonia (Excess-NH<sub>x</sub>) at the ten sites before (PC) and  
 291 during (DC) the COVID-19 outbreak.

| Sites | Substances                            | Total ( $\mu\text{g}/\text{m}^3$ ) | PC ( $\mu\text{g}/\text{m}^3$ ) | DC ( $\mu\text{g}/\text{m}^3$ ) |
|-------|---------------------------------------|------------------------------------|---------------------------------|---------------------------------|
| U-SMX | Required-NH <sub>4</sub> <sup>+</sup> | 9.1 $\pm$ 7.1                      | 12.7 $\pm$ 7.1                  | 7.0 $\pm$ 6.2                   |
|       | Excess-NH <sub>4</sub> <sup>+</sup>   | 14.7 $\pm$ 11.2                    | 13.6 $\pm$ 10.4                 | 15.3 $\pm$ 11.6                 |
| U-ZK  | Required-NH <sub>4</sub> <sup>+</sup> | 15.2 $\pm$ 9.6                     | 21.4 $\pm$ 8.6                  | 11.6 $\pm$ 8.4                  |
|       | Excess-NH <sub>4</sub> <sup>+</sup>   | 14.6 $\pm$ 8.3                     | 11.9 $\pm$ 6.0                  | 16.1 $\pm$ 9.0                  |
| U-ZMD | Required-NH <sub>4</sub> <sup>+</sup> | 13.9 $\pm$ 9.8                     | 19.4 $\pm$ 9.8                  | 10.4 $\pm$ 8.0                  |
|       | Excess-NH <sub>4</sub> <sup>+</sup>   | 12.8 $\pm$ 8.7                     | 11.6 $\pm$ 8.2                  | 13.6 $\pm$ 8.8                  |
| U-XY  | Required-NH <sub>4</sub> <sup>+</sup> | 10.2 $\pm$ 7.5                     | 14.6 $\pm$ 7.3                  | 7.4 $\pm$ 6.2                   |
|       | Excess-NH <sub>4</sub> <sup>+</sup>   | 7.8 $\pm$ 4.6                      | 6.5 $\pm$ 4.4                   | 8.7 $\pm$ 4.5                   |
| R-AY  | Required-NH <sub>4</sub> <sup>+</sup> | 17.1 $\pm$ 12.4                    | 23.9 $\pm$ 13.4                 | 12.8 $\pm$ 9.5                  |
|       | Excess-NH <sub>4</sub> <sup>+</sup>   | 21.2 $\pm$ 9.4                     | 20.2 $\pm$ 9.2                  | 21.9 $\pm$ 9.4                  |
| R-XX  | Required-NH <sub>4</sub> <sup>+</sup> | 13.5 $\pm$ 9.6                     | 18.0 $\pm$ 9.8                  | 10.7 $\pm$ 8.2                  |
|       | Excess-NH <sub>4</sub> <sup>+</sup>   | 23.3 $\pm$ 11.4                    | 19.6 $\pm$ 10.8                 | 25.6 $\pm$ 11.2                 |
| R-PY  | Required-NH <sub>4</sub> <sup>+</sup> | 13.8 $\pm$ 11.0                    | 22.1 $\pm$ 12.5                 | 9.3 $\pm$ 6.6                   |
|       | Excess-NH <sub>4</sub> <sup>+</sup>   | 22.3 $\pm$ 10.8                    | 17.5 $\pm$ 8.6                  | 25.0 $\pm$ 11.0                 |
| R-JZ  | Required-NH <sub>4</sub> <sup>+</sup> | 15.4 $\pm$ 10.4                    | 20.3 $\pm$ 10.6                 | 12.5 $\pm$ 9.1                  |
|       | Excess-NH <sub>4</sub> <sup>+</sup>   | 27.5 $\pm$ 12.9                    | 26.0 $\pm$ 13.1                 | 28.4 $\pm$ 12.7                 |
| R-SQ  | Required-NH <sub>4</sub> <sup>+</sup> | 13.2 $\pm$ 9.1                     | 19.1 $\pm$ 8.9                  | 9.9 $\pm$ 7.3                   |
|       | Excess-NH <sub>4</sub> <sup>+</sup>   | 15.1 $\pm$ 8.6                     | 10.1 $\pm$ 5.4                  | 17.9 $\pm$ 8.7                  |
| R-NY  | Required-NH <sub>4</sub> <sup>+</sup> | 9.9 $\pm$ 6.6                      | 13.0 $\pm$ 6.9                  | 8.1 $\pm$ 5.8                   |
|       | Excess-NH <sub>4</sub> <sup>+</sup>   | 6.0 $\pm$ 3.6                      | 4.4 $\pm$ 3.3                   | 6.9 $\pm$ 3.4                   |

292

293

Table S9. Comparison of the particle pH values in this study (PC/DC) and other sites

294

(mean or mean  $\pm$  standard).

|          | Sites     | Periods           | pH                          | References          |
|----------|-----------|-------------------|-----------------------------|---------------------|
| Urban    | Sanmenxia | Jan–Feb 2020      | 4.6 $\pm$ 0.5/4.8 $\pm$ 0.9 | This study          |
|          | Zhoukou   | Jan–Feb 2020      | 4.6 $\pm$ 0.6/5.1 $\pm$ 0.4 |                     |
|          | Zhumadian | Jan–Feb 2020      | 4.6 $\pm$ 0.3/4.8 $\pm$ 1.2 |                     |
|          | Xinyang   | Jan–Feb 2020      | 4.2 $\pm$ 0.3/4.6 $\pm$ 1.3 |                     |
| Rural    | Anyang    | Jan–Feb 2020      | 4.5 $\pm$ 0.4/4.6 $\pm$ 0.8 |                     |
|          | Xinxiang  | Jan–Feb 2020      | 4.8 $\pm$ 0.5/4.9 $\pm$ 0.9 |                     |
|          | Puyang    | Jan–Feb 2020      | 4.8 $\pm$ 0.3/5.1 $\pm$ 0.9 |                     |
|          | Jiaozuo   | Jan–Feb 2020      | 4.9 $\pm$ 0.5/5.1 $\pm$ 0.8 |                     |
|          | Shangqiu  | Jan–Feb 2020      | 4.5 $\pm$ 0.3/4.7 $\pm$ 0.8 |                     |
|          | Nanyang   | Jan–Feb 2020      | 4.2 $\pm$ 0.5/4.4 $\pm$ 0.7 |                     |
| Urban    | Beijing   | Jan–Feb 2015      | 4.5                         | (Guo et al., 2017)  |
|          | Beijing   | Dec 2016          | 4.3 $\pm$ 0.4               | (Liu et al., 2017)  |
|          | Beijing   | Feb 2017          | 4.5 $\pm$ 0.7               | (Ding et al., 2019) |
|          | Tianjin   | Dec–Jun 2015      | 4.9 $\pm$ 1.4               | (Shi et al., 2017)  |
|          | Tianjin   | Aug 2015          | 3.4 $\pm$ 0.5               | (Shi et al., 2019)  |
|          | Hohhot    | Winter            | 5.7                         | (Wang et al., 2019) |
|          | Mt. Tai   | Summer            | 2.9 $\pm$ 0.5               | (Liu et al., 2021b) |
|          | Taoyuan   | Nov 2017–Jan 2018 | 5.1 $\pm$ 1.0               | (Duan et al., 2021) |
|          | Zhengzhou | Jan 2018          | 4.5                         | (Wang et al., 2020) |
|          | Anyang    | Jan 2018          | 4.8                         | (Wang et al., 2020) |
| Mountain | Mt. Tai   | Summer            | 3.6 $\pm$ 0.7               | (Liu et al., 2021b) |
| Rural    | Shanglan  | Nov 2017–Jan 2018 | 5.5 $\pm$ 1.1               | (Duan et al., 2021) |

295

296 **References**

- 297 Behera, S. N., and Sharma, M.: Investigating the potential role of ammonia in ion  
298 chemistry of fine particulate matter formation for an urban environment, *Sci. Total*  
299 *Environ.*, 408, 3569–3575, <https://doi.org/10.1016/j.scitotenv.2010.04.017>, 2010.
- 300 Bougiatioti, A., Nikolaou, P., Stavroulas, I., Kouvarakis, G., Weber, R., Nenes, A.,  
301 Kanakidou, M., and Mihalopoulos, N.: Particle water and pH in the eastern  
302 Mediterranean: source variability and implications for nutrient availability, *Atmos.*  
303 *Chem. Phys.*, 16, 4579–4591, <https://doi.org/10.5194/acp-16-4579-2016>, 2016.
- 304 Burling, I. R., Yokelson, R. J., Griffith, D. W. T., Johnson, T. J., Veres, P., Roberts, J.  
305 M., Warneke, C., Urbanski, S. P., Reardon, J., Weise, D. R., Hao, W. M., and de  
306 Gouw, J.: Laboratory measurements of trace gas emissions from biomass burning  
307 of fuel types from the southeastern and southwestern United States, *Atmos. Chem.*  
308 *Phys.*, 10, 11115–11130, <https://doi.org/10.5194/acp-10-11115-2010>, 2010.
- 309 Chen, D., Zhou, L., Liu, S., Lian, C., Wang, W., Liu, H., Li, C., Liu, Y., Luo, L., Xiao,  
310 K., Chen, Y., Qiu, Y., Tan, Q., Ge, M., and Yang, F.: Primary sources of HONO  
311 vary during the daytime: Insights based on a field campaign, *Sci. Total Environ.*,  
312 903, <https://doi.org/10.1016/j.scitotenv.2023.166605>, 2023.
- 313 Cheng, Y., Zheng, G., Wei, C., Mu, Q., Zheng, B., Wang, Z., Gao, M., Z., Q., He, K.,  
314 Carmichael, G., Pöschl, U., and Su, and H.: Reactive nitrogen chemistry in aerosol  
315 water as a source of sulfate during haze events in China, *Sci. Adv.* 2, e1601530.,  
316 <https://doi.org/10.1126/sciadv.1601530>, 2019.
- 317 Ding, J., Zhao, P., Su, J., Dong, Q., Du, X., and Zhang, Y.: Aerosol pH and its driving  
318 factors in Beijing, *Atmos. Chem. Phys.* 19, 7939–7954,  
319 <https://doi.org/10.5194/acp-19-7939-2019>, 2019.
- 320 Duan, X., Yan, Y., Peng, L., Xie, K., Hu, D., Li, R., and Wang, C.: Role of ammonia in

321 secondary inorganic aerosols formation at an ammonia-rich city in winter in North  
322 China: A comparative study among industry, urban, and rural sites, *Environ.*  
323 *Pollut.*, 291, 118151, <https://doi.org/10.1016/j.envpol.2021.118151>, 2021.

324 Feng, S., Xu, W., Cheng, M., Ma, Y., Wu, L., Kang, J., Wang, K., Tang, A., Collett, J.  
325 L., Fang, Y., Goulding, K., Liu, X., and Zhang, F.: Overlooked nonagricultural and  
326 wintertime agricultural NH<sub>3</sub> emissions in Quzhou county, North China Plain:  
327 evidence from <sup>15</sup>N-Stable Isotopes. *Environ. Sci. Technol. Lett.* 9, 127–133,  
328 <https://doi.org/10.1021/acs.estlett.1c00935>, 2022.

329 Fuchs, H., Tan, Z., Lu, K., Bohn, B., Broch, S., Brown, S. S., Dong, H., Gomm, S.,  
330 Häsel, R., He, L., Hofzumahaus, A., Holland, F., Li, X., Liu, Y., Lu, S., Min, K.-  
331 E., Rohrer, F., Shao, M., Wang, B., Wang, M., Wu, Y., Zeng, L., Zhang, Y., Wahner,  
332 A., and Zhang, Y.: OH reactivity at a rural site (Wangdu) in the North China Plain:  
333 contributions from OH reactants and experimental OH budget, *Atmos. Chem.*  
334 *Phys.*, 17, 645–661, <https://doi.org/10.5194/acp-17-645-2017>, 2017.

335 Guo, H., Xu, L., Bougiatioti, A., Cerully, K. M., Capps, S. L., Hite, J. R., Carlton, A.  
336 G., Lee, S. H., Bergin, M. H., Ng, N. L., Nenes, A., and Weber, R. J.: Fine-particle  
337 water and pH in the southeastern United States, *Atmos. Chem. Phys.*, 15, 5211–  
338 5228, <https://doi.org/10.5194/acp-15-5211-2015>, 2015.

339 Guo, H., Sullivan, A. P., Campuzano-Jost, P., Schroder, J. C., Lopez-Hilfiker, F. D.,  
340 Dibb, J. E., Jimenez, J. L., Thornton, J. A., Brown, S. S., Nenes, A., and Weber, R.  
341 J.: Fine particle pH and the partitioning of nitric acid during winter in the  
342 northeastern United States, *J. Geophys. Res.: Atmos.*, 121,  
343 <https://doi.org/10.1002/2016jd025311>, 2016.

344 Guo, H., Weber, R. J., and Nenes, A.: High levels of ammonia do not raise fine particle  
345 pH sufficiently to yield nitrogen oxide-dominated sulfate production, *Sci. Rep.*, 7,  
346 12109, <https://doi.org/10.1038/s41598-017-11704-0>, 2017.

347 Hao, Q., Jiang, N., Zhang, R., Yang, L., and Li, S.: Characteristics, sources, and

348 reactions of nitrous acid during winter at an urban site in the Central Plains  
349 Economic Region in China, *Atmos. Chem. Phys.* 20, 7087–7102,  
350 <https://doi.org/10.5194/acp-20-7087-2020>, 2020.

351 Hu, B., Duan, J., Hong, Y., Xu, L., Li, M., Bian, Y., Qin, M., Fang, W., Xie, P., and  
352 Chen, J.: Exploration of the atmospheric chemistry of nitrous acid in a coastal city  
353 of southeastern China: results from measurements across four seasons, *Atmos.*  
354 *Chem. Phys.*, 22, 371–393, <https://doi.org/10.5194/acp-22-371-2022>, 2022.

355 Hu, Q., Zhang, L., Evans, G. J., and Yao, X.: Variability of atmospheric ammonia  
356 related to potential emission sources in downtown Toronto, Canada, *Atmos.*  
357 *Environ.* 99, 365–373, <https://doi.org/10.1016/j.atmosenv.2014.10.006>, 2014.

358 Huang, R., Yang, L., Cao, J., Wang, Q., Tie, X., Ho, K., Shen, Z., Zhang, R., Li, G.,  
359 Zhu, C., Zhang, N., Dai, W., Zhou, J., Liu, S., Chen, Y., Chen, J., and O'Dowd, C.  
360 D.: Concentration and sources of atmospheric nitrous acid (HONO) at an urban  
361 site in Western China, *Sci. Total. Environ.* 02, 165–172.  
362 <https://doi.org/10.1016/j.scitotenv.2017.02.166>, 2017.

363 Huy, D. H., Thanh, L. T., Hien, T. T., Noro, K., and Takenaka, N.: Characteristics of  
364 ammonia gas and fine particulate ammonium from two distinct urban areas: Osaka,  
365 Japan, and Ho Chi Minh City, Vietnam, *Environ Environ. Sci. Pollut. Res. Int.* 24,  
366 8147–8163, <https://doi.org/10.1007/s11356-017-8496-5>, 2017.

367 Kleffmann, J., Kurtenbach, R., Lörzer, J., Wiesen, P., Kalthoff, N., Vogel, B., and Vogel,  
368 H.: Measured and simulated vertical profiles of nitrous acid—Part I: Field  
369 measurements, *Atmos. Environ.*, 37, 2949–2955, [https://doi.org/10.1016/s1352-](https://doi.org/10.1016/s1352-2310(03)00242-5)  
370 [2310\(03\)00242-5](https://doi.org/10.1016/s1352-2310(03)00242-5), 2003.

371 Kramer, L. J., Crilley, L. R., Adams, T. J., Ball, S. M., Pope, F. D., and Bloss, W. J.:  
372 Nitrous acid (HONO) emissions under real-world driving conditions from vehicles  
373 in a UK road tunnel, *Atmos. Chem. Phys.* 20, 5231–5248,  
374 <https://doi.org/10.5194/acp-20-5231-2020>, 2020.

375 Kurtenbach, R., Becker, K.H., Gomes, J.A.G., Kleffmann, J., Lorzer, J.C., Spittler, M.,  
376 510, and Wiesen, P., Ackermann, R., Geyer, A., Platt, U.: Investigations of  
377 emissions and heterogeneous formation of HONO in a road traffic tunnel, *Atmos.*  
378 *Environ.*, 35, 3385-3394, [https://doi.org/10.1016/S1352-2310\(01\)00138-8](https://doi.org/10.1016/S1352-2310(01)00138-8), 2001.

379 Li, D., Xue, L., Wen, L., Wang, X., Chen, T., Mellouki, A., Chen, J., and Wang, W.:  
380 Characteristics and sources of nitrous acid in an urban atmosphere of northern  
381 China: Results from 1-yr continuous observations, *Atmos. Environ.*, 182, 296–306,  
382 <https://doi.org/10.1016/j.atmosenv.2018.03.033>, 2018.

383 Li, S., Song, W., Zhan, H., Zhang, Y., Zhang, X., Li, W., Tong, S., Pei, C., Wang, Y.,  
384 Chen, Y., Huang, Z., Zhang, R., Zhu, M., Fang, H., Wu, Z., Wang, J., Luo, S., Fu,  
385 X., Xiao, S., Huang, X., Zeng, J., Zhang, H., Chen, D., Gligorovski, S., Ge, M.,  
386 George, C., and Wang, X.: Contribution of vehicle emission and NO<sub>2</sub> surface  
387 conversion to nitrous acid (HONO) in urban environments: Implications from tests  
388 in a tunnel, *Environ Sci Technol*, 55, 15616–15624,  
389 <https://doi.org/10.1021/acs.est.1c00405>, 2021.

390 Li, X., Brauers, T., Haseler, R., Bohn, B., Fuchs, H., Hofzumahaus, A., Holland, F., Lou,  
391 S., Lu, K.D., Rohrer, F., Hu, M., Zeng, L.M., Zhang, Y.H., Garland, R.M., Su, H.,  
392 Nowak, A., Wiedensohler, A., Takegawa, N., Shao, M., and Wahner, A.: Exploring  
393 the atmospheric chemistry of nitrous acid (HONO) at a rural site in Southern China.  
394 *Atmos. Chem. Phys.* 12, 1497–1513, 2012.

395 Liu, J., Liu, Z., Ma, Z., Yang, S., Yao, D., Zhao, S., Hu, B., Tang, G., Sun, J., Cheng,  
396 M., Xu, Z., and Wang, Y.: Detailed budget analysis of HONO in Beijing, China:  
397 Implication on atmosphere oxidation capacity in polluted megacity, *Atmos.*  
398 *Environ.*, 244, <https://doi.org/10.1016/j.atmosenv.2020.117957>, 2021a.

399 Liu, M., Song, Y., Zhou, T., Xu, Z., Yan, C., Zheng, M., Wu, Z., Hu, M., Wu, Y., and  
400 Zhu, T.: Fine particle pH during severe haze episodes in northern China, *Geophys.*  
401 *Res. Lett.* 44, 5213–5221, <https://doi.org/10.1002/2017gl073210>, 2017.

402 Liu, P., Zhao, X., Zhang, C., Chen, H., Wang, J., Xue, L., Chen, J., and Mu, Y.: Fine  
403 particle pH and its influencing factors during summer at Mt. Tai: Comparison  
404 between mountain and urban sites, *Atmos. Environ.*, 261,  
405 <https://doi.org/10.1016/j.atmosenv.2021.118607>, 2021.

406 Liu, Y., Ni, S., Jiang, T., Xing, S., Zhang, Y., Bao, X., Feng, Z., Fan, X., Zhang, L., and  
407 Feng, H.: Influence of Chinese New Year overlapping COVID-19 lockdown on  
408 HONO sources in Shijiazhuang, *Sci Total Environ*, 745, 141025,  
409 <https://doi.org/10.1016/j.scitotenv.2020.141025>, 2020.

410 Lv, S., Wang, F., Wu, C., Chen, Y., Liu, S., Zhang, S., Li, D., Du, W., Zhang, F., Wang,  
411 H., Huang, C., Fu, Q., Duan, Y., and Wang, G.: Gas-to-aerosol phase partitioning  
412 of atmospheric water-soluble organic compounds at a rural site in China: an  
413 enhancing effect of NH<sub>3</sub> on SOA formation. *Environ. Sci. Technol.* 56, 3915–3924,  
414 <https://doi.org/10.1021/acs.est.1c06855>, 2022.

415 Lyu, X., Wang, N., Guo, H., Xue, L., Jiang, F., Zeren, Y., Cheng, H., Cai, Z., Han, L.,  
416 and Zhou, Y.: Causes of a continuous summertime O<sub>3</sub> pollution event in Jinan, a  
417 central city in the North China Plain, *Atmos. Chem. Phys.*, 19, 3025–3042,  
418 <https://doi.org/10.5194/acp-19-3025-2019>, 2019.

419 Meng, F., Qin, M., Tang, K., Duan, J., Fang, W., Liang, S., Ye, K., Xie, P., Sun, Y., Xie,  
420 C., Ye, C., Fu, P., Liu, J., and Liu, W.: High-resolution vertical distribution and  
421 sources of HONO and NO<sub>2</sub> in the nocturnal boundary layer in urban Beijing, China,  
422 *Atmos. Chem. Phys.*, 20, 5071–5092, <https://doi.org/10.5194/acp-20-5071-2020>,  
423 2020.

424 Mikuska, P., Motyka, K., and Vecera, Z.: Determination of nitrous acid in air using wet  
425 effluent diffusion denuder–FIA technique, *Talanta*; 77, 635–641,  
426 <https://doi.org/10.1016/j.talanta.2008.07.008>, 2008.

427 Nah, T., Guo, H., Sullivan, A. P., Chen, Y., Tanner, D. J., Nenes, A., Russell, A., Ng, N.  
428 L., Huey, L. G., and Weber, R. J.: Characterization of aerosol composition, aerosol



429 acidity, and organic acid partitioning at an agriculturally intensive rural  
430 southeastern US site, *Atmos. Chem. Phys.*, 18, 11471–11491,  
431 <https://doi.org/10.5194/acp-18-11471-2018>, 2018.

432 Rumsey, I. C., Cowen, K. A., Walker, J. T., Kelly, T. J., Hanft, E. A., Mishoe, K., Rogers,  
433 C., Proost, R., Beachley, G. M., Lear, G., Frelink, T., and Otjes, R. P.: An  
434 assessment of the performance of the Monitor for aerosols and gases in ambient  
435 air (MARGA): a semi-continuous method for soluble compounds. *Atmos. Chem.*  
436 *and Phys.* 14, 5639–5658, <https://doi.org/10.5194/acp-14-5639-2014>, 2014.

437 Saraswati, Sharma, S. K., Saxena, M., and Mandal, T. K.: Characteristics of gaseous  
438 and particulate ammonia and their role in the formation of secondary inorganic  
439 particulate matter at Delhi, India, *Atmos. Res.* 218, 34–49,  
440 <https://doi.org/10.1016/j.atmosres.2018.11.010>, 2019.

441 Seinfeld, J. H., Pandis, S. N., and Noone, K. J.: Atmospheric chemistry and physics:  
442 from air pollution to climate change. *Phys. Today* 51, 88–90,  
443 <https://doi.org/10.1063/1.882420>, 1998.

444 Shi, G., Xu, J., Peng, X., Xiao, Z., Chen, K., Tian, Y., Guan, X., Feng, Y., Yu, H., Nenes,  
445 A., and Russell, A. G.: pH of pH of aerosols in a polluted atmosphere: source  
446 contributions to highly acidic aerosol. *Environ. Sci. Technol.* 51, 4289–4296,  
447 <https://doi.org/10.1021/acs.est.6b05736>, 2017.

448 Shi, G., Xu, J., Peng, X., Xiao, Z., Chen, K., Tian, Y., Guan, X., Feng, Y., Yu, H., Nenes,  
449 A., and Russell, A. G.: pH of pH of aerosols in a polluted atmosphere: source  
450 contributions to highly acidic aerosol. *Environ. Sci. Technol.* 51, 4289–4296,  
451 <https://doi.org/10.1021/acs.est.6b05736>, 2017.

452 Shi, G., Xu, J., Shi, X., Liu, B., Bi, X., Xiao, Z., Chen, K., Wen, J., Dong, S., Tian, Y.,  
453 Feng, Y., Yu, H., Song, S., Zhao, Q., Gao, J., and Russell, A. G.: Aerosol pH  
454 dynamics during haze periods in an urban environment in China: use of detailed,  
455 hourly, speciated observations to study the role of ammonia availability and

456 secondary aerosol formation and urban environment. *J. Geophys. Res. Atmos.* 124,  
457 9730–9742, <https://doi.org/10.1029/2018jd029976>, 2019.

458 Song, S., Gao, M., Xu, W., Shao, J., Shi, G., Wang, S., Wang, Y., Sun, Y., and McElroy,  
459 M. B.: Fine-particle pH for Beijing winter haze as inferred from different  
460 thermodynamic equilibrium models, *Atmos. Chem. Phys.* 18, 7423–7438,  
461 <https://doi.org/10.5194/acp-18-7423-2018>, 2018.

462 Su, H., Cheng, Y. F., Cheng, P., Zhang, Y. H., Dong, S., Zeng, L. M., Wang, X., Slanina,  
463 J., Shao, M., and Wiedensohler, A.: Observation of nighttime nitrous acid (HONO)  
464 formation at a non-urban site during PRIDE-PRD2004 in China, *Atmos. Environ.*,  
465 42, 6219–6232, <https://doi.org/10.1016/j.atmosenv.2008.04.006>, 2008.

466 Takeuchi M, M. Y., Tsunoda H, Tanaka H.: Atmospheric acid gases in tokushima, Japan,  
467 monitored with parallel plate wet denuder coupled ion chromatograph. *Anal. Sci.*  
468 29, 165–168, <https://doi.org/10.2116/analsci.29.165>, 2013.

469 VandenBoer, T. C., Brown, S. S., Murphy, J. G., Keene, W. C., Young, C. J., Pszenny,  
470 A. A. P., Kim, S., Warneke, C., de Gouw, J. A., Maben, J. R., Wagner, N. L., Riedel,  
471 T. P., Thornton, J. A., Wolfe, D. E., Dubé, W. P., Öztürk, F., Brock, C. A., Grossberg,  
472 N., Lefer, B., Lerner, B., Middlebrook, A. M., and Roberts, J. M.: Understanding  
473 the role of the ground surface in HONO vertical structure: High resolution vertical  
474 profiles during NACHTT-11, *J. Geophys. Res.: Atmos.*, [https://doi.org/](https://doi.org/10.1002/jgrd.50721)  
475 [10.1002/jgrd.50721](https://doi.org/10.1002/jgrd.50721), 2013.

476 VandenBoer, T. C., Markovic, M. Z., Sanders, J. E., Ren, X., Pusede, S. E., Browne, E.  
477 C., Cohen, R. C., Zhang, L., Thomas, J., Brune, W. H., and Murphy, J. G.:  
478 Evidence for a nitrous acid (HONO) reservoir at the ground surface in Bakersfield,  
479 CA, during CalNex 2010. *J. Geophys. Res.: Atmos.* 119, 9093–9106,  
480 <https://doi.org/10.1002/2013jd020971>, 2014.

481 Veres, P., Roberts, J. M., Burling, I. R., Warneke, C., de Gouw, J., and Yokelson, R. J.:  
482 **Measurements of gas-phase inorganic and organic acids from biomass fires by**

483 negative-ion proton-transfer chemical-ionization mass spectrometry., *J. Geophys.*  
484 *Res.: Atmos.*, 115, D23302, <https://doi.org/10.1029/2010jd014033>, 2010.

485 Wang, G., Zhang, R., Gomez, M. E., Yang, L., Levy Zamora, M., Hu, M., Lin, Y., Peng,  
486 J., Guo, S., Meng, J., Li, J., Cheng, C., Hu, T., Ren, Y., Wang, Y., Gao, J., Cao, J.,  
487 An, Z., Zhou, W., Li, G., Wang, J., Tian, P., Marrero-Ortiz, W., Secret, J., Du, Z.,  
488 Zheng, J., Shang, D., Zeng, L., Shao, M., Wang, W., Huang, Y., Wang, Y., Zhu, Y.,  
489 Li, Y., Hu, J., Pan, B., Cai, L., Cheng, Y., Ji, Y., Zhang, F., Rosenfeld, D., Liss, P.  
490 S., Duce, R. A., Kolb, C. E., and Molina, M. J.: Persistent sulfate formation from  
491 London Fog to Chinese haze. *Proc. Natl. Acad. of Sci. U. S. A.* 113, 13630–13635,  
492 <https://doi.org/10.1073/pnas.1616540113>, 2016a.

493 Wang, H., Ding, J., Xu, J., Wen, J., Han, J., Wang, K., Shi, G., Feng, Y., Ivey, C. E.,  
494 Wang, Y., Nenes, A., Zhao, Q., and Russell, A. G.: Aerosols in an arid environment:  
495 the role of aerosol water content, particulate acidity, precursors, and relative  
496 humidity on secondary inorganic aerosols. *Sci. Total Environ.* 646, 564–572,  
497 <https://doi.org/10.1016/j.scitotenv.2018.07.321>, 2019.

498 Wang, M., Wang, S., Zhang, R., Yuan, M., Xu, Y., Shang, L., Song, X., Zhang, X., and  
499 Zhang, Y.: Exploring the HONO source during the COVID-19 pandemic in a  
500 megacity in China, *J. Environ. Sci.*, 149, 616–627,  
501 <https://doi.org/10.1016/j.jes.2023.12.021>, 2025.

502 Wang, R., Ye, X., Liu, Y., Li, H., Yang, X., Chen, J., Gao, W., and Yin, Z.:  
503 Characteristics of atmospheric ammonia and its relationship with vehicle  
504 emissions in a megacity in China, *Atmos. Environ.* 182, 97–104,  
505 <https://doi.org/10.1016/j.atmosenv.2018.03.047>, 2018.

506 Wang, S., Wang, L., Li, Y., Wang, C., Wang, W., Yin, S., and Zhang, R.: Effect of  
507 ammonia on fine-particle pH in agricultural regions of China: comparison between  
508 urban and rural sites, *Atmos. Chem. Phys.* 20, 2719–2734,  
509 <https://doi.org/10.5194/acp-20-2719-2020>, 2020.

510 Wang, W., Wang, S., Xu, J., Zhou, R., Shi, C., and Zhou, B.: Gas-phase ammonia and  
511 PM<sub>2.5</sub> ammonium in a busy traffic area of Nanjing, China, *Environ. Sci. Pollut.*  
512 *Res. Int.*, 23, 1691–1702, <https://doi.org/10.1007/s11356-015-5397-3>, 2016b.

513 Wang, X., Yin, S., Zhang, R., Yuan, M., and Ying, Q.: Assessment of summertime O<sub>3</sub>  
514 formation and the O<sub>3</sub>-NO<sub>x</sub>-VOC sensitivity in Zhengzhou, China using an  
515 observation-based model. *Sci. Total Environ.* 813, 152449,  
516 <https://doi.org/10.1016/j.scitotenv.2021.152449>, 2022.

517 Wang, Y., Zhu, S., Ma, J., Shen, J., Wang, P., Wang, P., and Zhang, H.: Enhanced  
518 atmospheric oxidation capacity and associated ozone increases during COVID-19  
519 lockdown in the Yangtze River Delta, *Sci. Total Environ.*, 768, 144796,  
520 <https://doi.org/10.1016/j.scitotenv.2020.144796>, 2021.

521 Wong, K. W., Oh, H. J., Lefer, B. L., Rappenglück, B., and Stutz, J.: Vertical profiles  
522 of nitrous acid in the nocturnal urban atmosphere of Houston, TX, *Atmos. Chem.*  
523 *Phys.*, 11, 3595–3609, <https://doi.org/10.5194/acp-11-3595-2011>, 2011.

524 Wu, S., Zhang, Y., Schwab, J., Li, Y., Liu, Y., and Yuan, C.: High-resolution ammonia  
525 emissions inventories in Fujian, China, 2009–2015, *Atmos. Environ.*, 162, 100–  
526 114, <https://doi.org/10.1016/j.atmosenv.2017.04.027>, 2017.

527 Xu, W., Kuang, Y., Zhao, C., Tao, J., Zhao, G., Bian, Y., Yang, W., Yu, Y., Shen, C.,  
528 Liang, L., Zhang, G., Lin, W., and Xu, X.: NH<sub>3</sub>-promoted hydrolysis of NO<sub>2</sub>  
529 induces explosive growth in HONO, *Atmos. Chem. Phys.* 19, 10557–10570,  
530 <https://doi.org/10.5194/acp-19-10557-2019>, 2019.

531 Xu, Z., Wang, T., Wu, J., Xue, L., Chan, J., Zha, Q., Zhou, S., Louie, P. K. K., and Luk,  
532 C. W. Y.: Nitrous acid (HONO) in a polluted subtropical atmosphere: Seasonal  
533 variability, direct vehicle emissions and heterogeneous production at ground  
534 surface, *Atmos. Environ.*, 106, 100–109,  
535 <https://doi.org/10.1016/j.atmosenv.2015.01.061>, 2015.

536 Yang, Y., Shao, M., Keβel, S., Li, Y., Lu, K., Lu, S., Williams, J., Zhang, Y., Zeng, L.,

537 Nölscher, A. C., Wu, Y., Wang, X., and Zheng, J.: How the OH reactivity affects  
538 the ozone production efficiency: case studies in Beijing and Heshan, China, *Atmos.*  
539 *Chem. Phys.*, 17, 7127–7142, <https://doi.org/10.5194/acp-17-7127-2017>, 2017.

540 Yu, Y., Cheng, P., Li, H., Yang, W., Han, B., Song, W., Hu, W., Wang, X., Yuan, B.,  
541 Shao, M., Huang, Z., Li, Z., Zheng, J., Wang, H., and Yu, X.: Budget of nitrous  
542 acid (HONO) at an urban site in the fall season of Guangzhou, China, *Atmos.*  
543 *Chem. Phys.*, 22, 8951–8971, <https://doi.org/10.5194/acp-22-8951-2022>, 2022.

544 Yun, H., Wang, Z., Zha, Q., Wang, W., Xue, L., Zhang, L., Li, Q., Cui, L., Lee, S., Poon,  
545 S. C. N., and Wang, T.: Nitrous acid in a street canyon environment: Sources and  
546 contributions to local oxidation capacity, *Atmos. Environ.*, 167, 223–234,  
547 <https://doi.org/10.1016/j.atmosenv.2017.08.018>, 2017.

548 Zellweger, M. A., P.Hofer,U.Baltensperger.: NO<sub>y</sub> speciation with a combined wet  
549 effluent diffusion denuder–aerosol collector coupled to ion chromatography,  
550 *Atmos. Environ.*, 33, 1131–1140, [https://doi.org/10.1016/s1352-2310\(98\)00295-7](https://doi.org/10.1016/s1352-2310(98)00295-7),  
551 1999.

552 Zhang, S., Sarwar, G., Xing, J., Chu, B., Xue, C., Sarav, A., Ding, D., Zheng, H., Mu,  
553 Y., Duan, F., Ma, T., and He, H.: Improving the representation of HONO chemistry  
554 in CMAQ and examining its impact on haze over China, *Atmos. Chem. Phys.*, 21,  
555 15809–15826, <https://doi.org/10.5194/acp-21-15809-2021>, 2021.

556 Zhang, W., Tong, S., Jia, C., Wang, L., Liu, B., Tang, G., Ji, D., Hu, B., Liu, Z., Li, W.,  
557 Wang, Z., Liu, Y., Wang, Y., and Ge, M.: Different HONO sources for three layers  
558 at the urban area of Beijing. *Environ. Sci. Technol.* 54, 12870–12880,  
559 <https://doi.org/10.1021/acs.est.0c02146>, 2020a.

560 Zhang, Y., Liu, X., Fang, Y., Liu, D., Tang, A., and Collett, J. L.: Atmospheric ammonia  
561 in Beijing during the COVID-19 outbreak: concentrations, sources, and  
562 implications. *Environ. Sci. Technol. Lett.* 8, 32–38,  
563 <https://doi.org/10.1021/acs.estlett.0c00756>, 2020b.

564 Zhao, Y., Zhang, N., Wei, Q., Han, Y., Mao, K., Cai, Y., and Li, R.: Flow injection  
565 chemiluminescence method in analytical chemistry., *Spectrosc. Spectra. Anal.*, 30,  
566 2512–2517., <https://doi.org/11-2200/O4WCNKI>, 2010.
